# Supplementary material for: Somatic copy number alteration and fragmentation analysis in circulating tumor DNA for cancer screening and treatment monitoring in colorectal cancer patients
Source: J Hematol Oncol. 2022 Sep 2;15:125. doi: 10.1186/s13045-022-01342-z (PMC9438339; doi:10.1186/s13045-022-01342-z)
Supplement: Supplementary file 2 — Additional file 2: Data required to reproduce the results shown in Tables S2–S8. [file 13045_2022_1342_MOESM2_ESM.xlsx]

## Sheet: Supplementary Table 2
Supplementary Table 2: Sample characteristics
Sample_Type	LB_Nr	SampleID	Gender	Age	UICC	UICC_Add	R-Class	clinical.data.indicating.presence.of.tumor..PET.SCAN..MRI..CT.	Course	staging	sampling time	Therapy_S	Therapy_C	Days	Tumor	Site	Metastasis	Microsatellites	Material	Peak (bp)	cfDNA per ml plasma (ng/ml)	Plasma_Vol_ml	Pool	Average alignment coverage over genome	Number of alignment records	Number of filtered records (total)	Average alignment coverage over genome (90 to 150 bp)	Number of alignment records (90 to 150 bp)	CEA (ng/ml)	Smoking	ddPCR	Gene	SNV	Gene_2	SNV	Gene_3	SNV	Gene_4	CNV	SV	LOB	LOD	LOQ	TE_LOQ	TE_LOQ_10	TE_10_100	Cop_µl_SNV	Cop_µl_WT	Fract_Ab
CRC	LB-CRC-01	LB-CRC-01-P-01	m	84	II	A	R0	yes	before	diagnosis	baseline	Surgery	NA	-3	NA	NA	NA	MSI-H	Plasma	162	33.796	7.5	LB_WGS-SP-05	5.67	199667660	18505739	1.03	33040780	0.77697	NA	no	NA	NA	NA	NA	NA	NA	NA	NA	NA	NA	NA	NA	NA	NA	NA	NA	NA	NA
CRC	LB-CRC-01	LB-CRC-01-P-02	m	84	II	A	R0	no	after	remission	post_surgery_1	Surgery	NA	3	NA	NA	NA	MSI-H	Plasma	165	23.0868	7.5	LB_WGS-SP-05	6.12	217938045	21778448	0.95	30516738	1.37631	NA	no	NA	NA	NA	NA	NA	NA	NA	NA	NA	NA	NA	NA	NA	NA	NA	NA	NA	NA
CRC	LB-CRC-01	LB-CRC-01-P-03	m	84	II	A	R0	NA	after	remission	post_surgery_1	Surgery	NA	36	NA	NA	NA	MSI-H	Plasma	167	17.2044	7.5	LB_WGS-SP-05	5.12	182146598	18047897	0.75	24007086	0.809148	NA	no	NA	NA	NA	NA	NA	NA	NA	NA	NA	NA	NA	NA	NA	NA	NA	NA	NA	NA
CRC	LB-CRC-01	LB-CRC-01-S-01	m	84	II	A	R0	no	before			Surgery	NA	-3	NA	NA	NA	MSI-H	Sputum				LB_WGS-SP-06	0.86	47662829	19198944			NA	NA	no	NA	NA	NA	NA	NA	NA	NA	NA	NA	NA	NA	NA	NA	NA	NA	NA	NA	NA
CRC	LB-CRC-01	LB-CRC-01-T-01	m	84	II	A	R0		NA	NA	NA	Surgery	NA	NA	NA	NA	NA	MSI-H	FFPE				LB_WGS-SP-06	1.04	42870765	6887805			NA	NA	no	NA	NA	NA	NA	NA	NA	NA	NA	NA	NA	NA	NA	NA	NA	NA	NA	NA	NA
CRC	LB-CRC-04	LB-CRC-04-P-01	f	42	IV	NA	NA	no	before	diagnosis	baseline	NA	Chemo	0	NA	NA	Liver, Peritoneum	MSS	Plasma	168	9.3004	7.5	LB_WGS-SP-05	6.1	213767555	18725140	1.01	32416474	0.761655	NA	no	NA	NA	NA	NA	NA	NA	NA	NA	NA	NA	NA	NA	NA	NA	NA	NA	NA	NA
CRC	LB-CRC-04	LB-CRC-04-S-01	f	42	IV	NA	NA	yes	NA			NA	Chemo	0	NA	NA	Liver, Peritoneum	MSS	Sputum				LB_WGS-SP-06	0.69	31338822	8284385			NA	NA	no	NA	NA	NA	NA	NA	NA	NA	NA	NA	NA	NA	NA	NA	NA	NA	NA	NA	NA
CRC	LB-CRC-04	LB-CRC-04-T-01	f	42	IV	NA	NA		NA			NA	Chemo	NA	NA	NA	Liver, Peritoneum	MSS	FFPE				LB_WGS-SP-06	0.95	57435716	22056257			NA	NA	no	NA	NA	NA	NA	NA	NA	NA	NA	NA	NA	NA	NA	NA	NA	NA	NA	NA	NA
CRC	LB-CRC-07	LB-CRC-07-P-02	f	69	II	A	R0	yes	after	remission	post_surgery_1	Surgery	Chemo	3	Karzinom	Colon ascendens	NA	MSI	Plasma	166	13	NA	LB_WGS-SP-02	5.49	199607698	24067110	0.78	24809254	1.23	former smoker	yes	BRAF	p.V600E	NA	NA			NA	NA	NA	0.02	0.4	0.52	0.5236	0.3632	0.1489	0	255.32	0
CRC	LB-CRC-07	LB-CRC-07-P-06	f	69	II	A	R0	yes	after	remission	post_surgery_2	Surgery	Chemo	303	Karzinom	Colon ascendens	Liver	MSI	Plasma	175	4.51	7	LB_WGS-SP-02	5.67	200477814	19252808	0.7	22412011	1.82	former smoker	yes	BRAF	p.V600E	NA	NA			NA	NA	NA	0.02	0.4	0.52	0.5236	0.3632	0.1489	0.05	85.57	0.06
CRC	LB-CRC-07	LB-CRC-07-P-08	f	69	II	A	R0	no	after	partial_remission	chemo_1	Surgery	Chemo	584	Karzinom	Colon ascendens	Liver	MSI	Plasma	167	51.29	4	LB_WGS-SP-02	6.65	236519769	23836348	1.18	37685539	1.31	former smoker	yes	BRAF	p.V600E	NA	NA			NA	NA	NA	0.02	0.4	0.52	0.5236	0.3632	0.1489	0.23786	372.925	0.0637417
CRC	LB-CRC-07	LB-CRC-07-P-09	f	69	II	A	R0	yes	after	partial_remission	chemo_1	Surgery	Chemo	616	Karzinom	Colon ascendens	Liver	MSI	Plasma	171	14.42	6.5	LB_WGS-SP-02	7.96	293392921	36617647	1.11	35967177	0.7	former smoker	yes	BRAF	p.V600E	NA	NA			NA	NA	NA	0.02	0.4	0.52	0.5236	0.3632	0.1489	0.0527152	345.57	0.0152522
CRC	LB-CRC-07	LB-CRC-07-P-10	f	69	II	A	R0	yes	after	stable_disease	chemo_1	Surgery	Chemo	644	Karzinom	Colon ascendens	Liver	MSI	Plasma	168	26.92	4.5	LB_WGS-SP-02	7.6	271817065	29000498	1.06	34029590	0.79	former smoker	yes	BRAF	p.V600E	NA	NA			NA	NA	NA	0.02	0.4	0.52	0.5236	0.3632	0.1489	0	227.397	0
CRC	LB-CRC-07	LB-CRC-07-P-11	f	69	II	A	R0	no	after	stable_disease	chemo_1	Surgery	Chemo	672	Karzinom	Colon ascendens	Liver	MSI	Plasma	165	25.91	3.5	LB_WGS-SP-02	7.43	264493856	27094124	1.05	33480113	0.88	former smoker	yes	BRAF	p.V600E	NA	NA			NA	NA	NA	0.02	0.4	0.52	0.5236	0.3632	0.1489	0	180.626	0
CRC	LB-CRC-07	LB-CRC-07-P-12	f	69	II	A	R0	yes	after	stable_disease	chemo_1	Surgery	Chemo	696	Karzinom	Colon ascendens	Liver	MSI	Plasma	155	129.66	7.5	LB_WGS-SP-02	6.56	230324890	20564096	0.79	25174225	0.63	former smoker	yes	BRAF	p.V600E	NA	NA			NA	NA	NA	0.02	0.4	0.52	0.5236	0.3632	0.1489	0	445.136	0
CRC	LB-CRC-07	LB-CRC-07-P-13	f	69	II	A	R0	yes	after	stable_disease	chemo_1	Surgery	Chemo	704	Karzinom	Colon ascendens	Liver	MSI	Plasma	173	171.26	7.5	LB_WGS-SP-02	7.07	252733053	26540091	0.81	25765458	0.76	former smoker	yes	BRAF	p.V600E	NA	NA			NA	NA	NA	0.02	0.4	0.52	0.5236	0.3632	0.1489	0	167.42	0
CRC	LB-CRC-07	LB-CRC-07-P-14	f	69	II	A	R0	no	after	stable_disease	chemo_1	Surgery	Chemo	758	Karzinom	Colon ascendens	Liver	MSI	Plasma	173	57.71	6.5	LB_WGS-SP-02	5.24	191665779	23698619	1.09	34897210	0.82	former smoker	yes	BRAF	p.V600E	NA	NA			NA	NA	NA	0.02	0.4	0.52	0.5236	0.3632	0.1489	0.03	448.31	0.01
CRC	LB-CRC-07	LB-CRC-07-P-15	f	69	II	A	R0	yes	after	stable_disease	CIP_1	Surgery	Chemo	799	Karzinom	Colon ascendens	Liver	MSI	Plasma	168	89.43	5	LB_WGS-SP-02	6.99	247584718	23516883	1.6	51110565	0.41	former smoker	no	BRAF	p.V600E	NA	NA			NA	NA	NA	NA	NA	NA	NA	NA	NA	NA	NA	NA
CRC	LB-CRC-07	LB-CRC-07-P-16	f	69	II	A	R0	yes	after	stable_disease	CIP_1	Surgery	Chemo	822	Karzinom	Colon ascendens	Liver	MSI	Plasma	168	16.23	7.5	LB_WGS-SP-02	6.97	268547344	38063978	1.41	46346950	0.29	former smoker	yes	BRAF	p.V600E	NA	NA			NA	NA	NA	0.02	0.4	0.52	0.5236	0.3632	0.1489	0	322.037	0
CRC	LB-CRC-07	LB-CRC-07-P-17	f	69	II	A	R0	yes	after	stable_disease	CIP_1	Surgery	Chemo	862	Karzinom	Colon ascendens	Liver	MSI	Plasma	168	8.292	7.5	LB_WGS-SP-02	13.08	473737669	54448159	1.65	52964213	0.7	former smoker	no	BRAF	p.V600E	NA	NA			NA	NA	NA	NA	NA	NA	NA	NA	NA	NA	NA	NA
CRC	LB-CRC-07	LB-CRC-07-P-18	f	69	II	A	R0	yes	after	stable_disease	CIP_1	Surgery	Chemo	893	Karzinom	Colon ascendens	Liver	MSI	Plasma	167	14.7536	7.5	LB_WGS-SP-02	15.31	553463076	61343871	2.19	70620907	3.32	former smoker	no	BRAF	p.V600E	NA	NA			NA	NA	NA	NA	NA	NA	NA	NA	NA	NA	NA	NA
CRC	LB-CRC-07	LB-CRC-07-P-19	f	69	II	A	R0		after	stable_disease	CIP_1	Surgery	Chemo	946	Karzinom	Colon ascendens	Liver	MSI	Plasma	172	2.5248	7.5	LB_WGS-SP-02	11.89	418110776	38504780	1.03	33008503	0.7	former smoker	no	BRAF	p.V600E	NA	NA			NA	NA	NA	NA	NA	NA	NA	NA	NA	NA	NA	NA
CRC	LB-CRC-07	LB-CRC-07-P-20	f	69	II	A	R0		after	stable_disease	CIP_1	Surgery	Chemo	1004	Karzinom	Colon ascendens	Liver	MSI	Plasma	171	1.656	7.5	LB_WGS-SP-02	13.03	457087268	40606117	1.33	42467038	0.58	former smoker	no	BRAF	p.V600E	NA	NA			NA	NA	NA	NA	NA	NA	NA	NA	NA	NA	NA	NA
CRC	LB-CRC-07	LB-CRC-07-P-21	f	69	II	A	R0		after	stable_disease	CIP_1	Surgery	Chemo	1065	Karzinom	Colon ascendens	Liver	MSI	Plasma	173	1.9344	7.5	LB_WGS-SP-02	8.38	296627721	28466049	0.93	29935307	0.59	former smoker	no	BRAF	p.V600E	NA	NA			NA	NA	NA	NA	NA	NA	NA	NA	NA	NA	NA	NA
CRC	LB-CRC-07	LB-CRC-07-S-01	f	69	II	A	R0	NA	after			Surgery	Chemo	NA	Karzinom	Colon ascendens	NA	MSI	Sputum	NA	NA	NA	LB_WGS-SP-01	1.3	47335963	4877108			NA	former smoker	no	BRAF	p.V600E	NA	NA			NA	NA	NA	NA	NA	NA	NA	NA	NA	NA	NA	NA
CRC	LB-CRC-07	LB-CRC-07-T-01	f	69	II	A	NA	NA	NA			Surgery	Chemo	NA	Karzinom	Colon ascendens	NA	MSI	FFPE	NA	NA	NA	LB_WGS-SP-01	1.65	62418865	8334121			NA	former smoker	yes	BRAF	p.V600E	NA	NA			NA	NA	NA	0.02	0.4	0.52	0.5236	0.3632	0.1489	39.7	376.52	9.54
CRC	LB-CRC-08	LB-CRC-08-P-01	m	39	IV	C	lokoregionär R0	yes	before	diagnosis	baseline	Surgery	Chemo	-1	Adenokarzinom	Sigma	Liver, Peritoneum, Lung	MSS	Plasma	168	22.41	7.5	LB_WGS-SP-02	3.36	119135470	11405953	0.71	22798989	0.33	non-smoker	no	TP53	c.961A>T (NM_000546.5), p.K321*	NA	NA			FGFR2	10q26.13 (8.3x Amp)	TBL1XR1(Ex1)-PIK3CA(Ex2) Fusion	NA	NA	NA	NA	NA	NA	NA	NA	NA
CRC	LB-CRC-08	LB-CRC-08-P-02	m	39	IV	C	lokoregionär R0	NA	during	therapy	post_surgery_1	Surgery	Chemo	3	Adenokarzinom	Sigma	Liver, Peritoneum, Lung	MSS	Plasma	175	41.562	3	LB_WGS-SP-02	6.96	248975973	26289690	0.94	30002799	0.19	non-smoker	no	TP53	c.961A>T (NM_000546.5), p.K321*	NA	NA			FGFR2	10q26.13 (8.3x Amp)	TBL1XR1(Ex1)-PIK3CA(Ex2) Fusion	NA	NA	NA	NA	NA	NA	NA	NA	NA
CRC	LB-CRC-08	LB-CRC-08-P-03	m	39	IV	C	lokoregionär R0	NA	during	therapy	post_surgery_1	Surgery	Chemo	34	Adenokarzinom	Sigma	Liver, Peritoneum, Lung	MSS	Plasma	162	26.4768	7.5	LB_WGS-SP-02	10.52	374609986	38106216	1.97	62903798	1.28	non-smoker	no	TP53	c.961A>T (NM_000546.5), p.K321*	NA	NA			FGFR2	10q26.13 (8.3x Amp)	TBL1XR1(Ex1)-PIK3CA(Ex2) Fusion	NA	NA	NA	NA	NA	NA	NA	NA	NA
CRC	LB-CRC-08	LB-CRC-08-P-04	m	39	IV	C	lokoregionär R0	NA	during	therapy	chemo_1	Surgery	Chemo	85	Adenokarzinom	Sigma	Liver, Peritoneum, Lung	MSS	Plasma	164	16.1992	7.5	LB_WGS-SP-02	10.95	387656982	37956337	1.78	56839735	4.76	non-smoker	no	TP53	c.961A>T (NM_000546.5), p.K321*	NA	NA			FGFR2	10q26.13 (8.3x Amp)	TBL1XR1(Ex1)-PIK3CA(Ex2) Fusion	NA	NA	NA	NA	NA	NA	NA	NA	NA
CRC	LB-CRC-08	LB-CRC-08-P-05	m	39	IV	C	lokoregionär R0	NA	during	progressive_disease	chemo_2	Surgery	Chemo	181	Adenokarzinom	Sigma	Liver, Peritoneum, Lung	MSS	Plasma	165	5.8288	7.5	LB_WGS-SP-02	10.13	358438225	34767401	1.86	59460438	3.6	non-smoker	no	TP53	c.961A>T (NM_000546.5), p.K321*	NA	NA			FGFR2	10q26.13 (8.3x Amp)	TBL1XR1(Ex1)-PIK3CA(Ex2) Fusion	NA	NA	NA	NA	NA	NA	NA	NA	NA
CRC	LB-CRC-08	LB-CRC-08-P-06	m	39	IV	C	lokoregionär R0	yes	during	progressive_disease	pal_chemo	Surgery	Chemo	352	Adenokarzinom	Sigma	Liver, Peritoneum, Lung	MSS	Plasma	159	31.482	7	LB_WGS-SP-02	9.76	346737696	34418418	2.29	73244206	20.88	non-smoker	no	TP53	c.961A>T (NM_000546.5), p.K321*	NA	NA			FGFR2	10q26.13 (8.3x Amp)	TBL1XR1(Ex1)-PIK3CA(Ex2) Fusion	NA	NA	NA	NA	NA	NA	NA	NA	NA
CRC	LB-CRC-08	LB-CRC-08-P-07	m	39	IV	C	lokoregionär R0	NA	during	progressive_disease	pal_chemo	Surgery	Chemo	370	Adenokarzinom	Sigma	Liver, Peritoneum, Lung	MSS	Plasma	160	191.772	3	LB_WGS-SP-03	4.56	160065207	14592659	1.04	33132247	35.21	non-smoker	no	TP53	c.961A>T (NM_000546.5), p.K321*	NA	NA			FGFR2	10q26.13 (8.3x Amp)	TBL1XR1(Ex1)-PIK3CA(Ex2) Fusion	NA	NA	NA	NA	NA	NA	NA	NA	NA
CRC	LB-CRC-08	LB-CRC-08-S-01	m	39	IV	C	lokoregionär R0	yes	before			Surgery	Chemo	-1	Adenokarzinom	Sigma	Liver, Peritoneum, Lung	MSS	Sputum	NA	NA	NA	LB_WGS-SP-01	1.09	46262599	9625559	NA	NA	NA	non-smoker	no	TP53	c.961A>T (NM_000546.5), p.K321*	NA	NA			FGFR2	10q26.13 (8.3x Amp)	TBL1XR1(Ex1)-PIK3CA(Ex2) Fusion	NA	NA	NA	NA	NA	NA	NA	NA	NA
CRC	LB-CRC-08	LB-CRC-08-T-01	m	39	IV	C	lokoregionär R0	yes	NA			Surgery	Chemo	NA	Adenokarzinom	Sigma	Liver, Peritoneum, Lung	MSS	FFPE	NA	NA	NA	LB_WGS-SP-01	1.28	47727764	5751364			NA	non-smoker	no	TP53	c.961A>T (NM_000546.5), p.K321*	NA	NA			FGFR2	10q26.13 (8.3x Amp)	TBL1XR1(Ex1)-PIK3CA(Ex2) Fusion	NA	NA	NA	NA	NA	NA	NA	NA	NA
CRC	LB-CRC-13	LB-CRC-13-P-01	m	56	IV	B	R0 (lokal)	yes	before	diagnosis	baseline	Surgery	Chemo	0	NA	NA	NA	NA	Plasma	168	2.5452	7.5	LB_WGS-SP-05	5.43	189803779	16527822	0.89	28358577	0.388349	NA	no	NA	NA	NA	NA	NA	NA	NA	NA	NA	NA	NA	NA	NA	NA	NA	NA	NA	NA
CRC	LB-CRC-13	LB-CRC-13-P-02	m	56	IV	B	R0 (lokal)	no	during	therapy	post_surgery_1	Surgery	Chemo	6	NA	NA	NA	NA	Plasma	171	4.3732	7.5	LB_WGS-SP-05	5.14	180649736	16523084	0.72	23074510	0.249158	NA	no	NA	NA	NA	NA	NA	NA	NA	NA	NA	NA	NA	NA	NA	NA	NA	NA	NA	NA
CRC	LB-CRC-13	LB-CRC-13-S-01	m	56	IV	B	R0 (lokal)	yes	NA			Surgery	Chemo	0	NA	NA	NA	NA	Sputum				LB_WGS-SP-06	0.84	35619365	6537335			NA	NA	no	NA	NA	NA	NA	NA	NA	NA	NA	NA	NA	NA	NA	NA	NA	NA	NA	NA	NA
CRC	LB-CRC-13	LB-CRC-13-T-01	m	56	IV	B	R0 (lokal)	NA	NA			Surgery	Chemo	NA	NA	NA	NA	NA	FFPE				LB_WGS-SP-06	1.29	49327103	5320387			NA	NA	no	NA	NA	NA	NA	NA	NA	NA	NA	NA	NA	NA	NA	NA	NA	NA	NA	NA	NA
CRC	LB-CRC-15	LB-CRC-15-P-01	m	77	II	A	R0	no	before	diagnosis	baseline	Surgery	NA	-1	Adenokarzinom	Colon ascendens	NA	NA	Plasma	169	2.648	6	LB_WGS-SP-03	5.85	205278307	18303913	0.74	23679280	0.03	NA	no	NA	NA	NA	NA			NA	NA	NA	NA	NA	NA	NA	NA	NA	NA	NA	NA
CRC	LB-CRC-15	LB-CRC-15-P-02	m	77	II	A	R0	no	after	remission	post_surgery_1	Surgery	NA	4	Adenokarzinom	Colon ascendens	NA	NA	Plasma	170	15.432	7.5	LB_WGS-SP-03	2.2	77525727	7315137	0.29	9255139	3.8	NA	no	NA	NA	NA	NA			NA	NA	NA	NA	NA	NA	NA	NA	NA	NA	NA	NA
CRC	LB-CRC-15	LB-CRC-15-P-03	m	77	II	A	R0	yes	after	remission	post_surgery_1	Surgery	NA	26	Adenokarzinom	Colon ascendens	NA	NA	Plasma	167	30.4736	7.5	LB_WGS-SP-03	5.96	209877073	19575124	0.82	26052287	0.14	NA	no	NA	NA	NA	NA			NA	NA	NA	NA	NA	NA	NA	NA	NA	NA	NA	NA
CRC	LB-CRC-15	LB-CRC-15-P-04	m	77	II	A	R0	yes	after	remission	post_surgery_1	Surgery	NA	60	Adenokarzinom	Colon ascendens	NA	NA	Plasma	171	5.328	6.5	LB_WGS-SP-03	4.04	144350544	15126663	0.5	16131388	0.03	NA	no	NA	NA	NA	NA			NA	NA	NA	NA	NA	NA	NA	NA	NA	NA	NA	NA
CRC	LB-CRC-15	LB-CRC-15-S-01	m	77	II	A	R0	yes	before			Surgery	NA	-1	Adenokarzinom	Colon ascendens	NA	NA	Sputum			NA	LB_WGS-SP-01	1.07	60942019	24196482			0.57868		no	NA	NA	NA	NA			NA	NA	NA	NA	NA	NA	NA	NA	NA	NA	NA	NA
CRC	LB-CRC-15	LB-CRC-15-T-01	m	77	II	A	R0	no	NA			Surgery	NA	NA	Adenokarzinom	Colon ascendens	NA	NA	FFPE			NA	LB_WGS-SP-01	0.77	28285671	2828155			NA		no	NA	NA	NA	NA			NA	NA	NA	NA	NA	NA	NA	NA	NA	NA	NA	NA
CRC	LB-CRC-17	LB-CRC-17-P-01	f	82	I	NA	R0	no	before	diagnosis	baseline	Surgery	NA	-1	NA	NA	NA	NA	Plasma	164	2.78871	7	LB_WGS-SP-05	4.88	170537329	14610516	0.71	22703346	NA	NA	no	NA	NA	NA	NA	NA	NA	NA	NA	NA	NA	NA	NA	NA	NA	NA	NA	NA	NA
CRC	LB-CRC-17	LB-CRC-17-P-02	f	82	I	NA	R0	no	after	remission	post_surgery_1	Surgery	NA	6	NA	NA	NA	NA	Plasma	167	3.1376	7.5	LB_WGS-SP-05	5.7	199060302	17019680	0.74	23635493	0.780544	NA	no	NA	NA	NA	NA	NA	NA	NA	NA	NA	NA	NA	NA	NA	NA	NA	NA	NA	NA
CRC	LB-CRC-17	LB-CRC-17-S-01	f	82	I	NA	R0	no	NA			Surgery	NA	-1	NA	NA	NA	NA	Sputum				LB_WGS-SP-06	0.66	26053061	4521133			NA	NA	no	NA	NA	NA	NA	NA	NA	NA	NA	NA	NA	NA	NA	NA	NA	NA	NA	NA	NA
CRC	LB-CRC-17	LB-CRC-17-T-01	f	82	I	NA	R0	no	NA			Surgery	NA	NA	NA	NA	NA	NA	FFPE				LB_WGS-SP-06	1.03	37457466	3777554			NA	NA	no	NA	NA	NA	NA	NA	NA	NA	NA	NA	NA	NA	NA	NA	NA	NA	NA	NA	NA
CRC	LB-CRC-20	LB-CRC-20-P-01	m	80	II	A	R0	yes	before	diagnosis	baseline	Surgery	NA	-1	Adenokarzinom	Sigma, Rectum	NA	NA	Plasma	170	3.4176	5	LB_WGS-SP-03	3.42	119592984	10500930	0.39	12577216	0.14	non-smoker	no	NA	NA	NA	NA			NA	NA	NA	NA	NA	NA	NA	NA	NA	NA	NA	NA
CRC	LB-CRC-20	LB-CRC-20-P-02	m	80	II	A	R0	no	after	remission	post_surgery_1	Surgery	NA	5	Adenokarzinom	Sigma, Rectum	NA	NA	Plasma	165	17.3914	7	LB_WGS-SP-03	6.89	245557661	25324579	1.03	32848928	0.234864	non-smoker	no	NA	NA	NA	NA			NA	NA	NA	NA	NA	NA	NA	NA	NA	NA	NA	NA
CRC	LB-CRC-20	LB-CRC-20-P-03	m	80	II	A	R0	yes	after	remission	post_surgery_1	Surgery	NA	33	Adenokarzinom	Sigma, Rectum	NA	NA	Plasma	172	6.20727	5.5	LB_WGS-SP-03	5.21	182213135	15782305	0.53	16839412	2.37	non-smoker	no	NA	NA	NA	NA			NA	NA	NA	NA	NA	NA	NA	NA	NA	NA	NA	NA
CRC	LB-CRC-20	LB-CRC-20-S-01	m	80	II	A	R0	no	before			Surgery	NA	-1	Adenokarzinom	Sigma, Rectum	NA	NA	Sputum	NA	NA	NA	LB_WGS-SP-01	0.87	32789999	3733944			NA	non-smoker	no	NA	NA	NA	NA			NA	NA	NA	NA	NA	NA	NA	NA	NA	NA	NA	NA
CRC	LB-CRC-20	LB-CRC-20-T-01	m	80	II	A	R0	no	NA			Surgery	NA	NA	Adenokarzinom	Sigma, Rectum	NA	NA	FFPE	NA	NA	NA	LB_WGS-SP-01	1.37	51666520	5904950			NA	non-smoker	no	NA	NA	NA	NA			NA	NA	NA	NA	NA	NA	NA	NA	NA	NA	NA	NA
CRC	LB-CRC-21	LB-CRC-21-P-01	f	76	IV	NA	NA	yes	before	diagnosis	baseline	Surgery	Chemo	NA	Adenokarzinom	Colon	Ovary, Liver	NA	Plasma	167	12.86	7.5	LB_WGS-SP-03	5.1	179442958	16470588	0.86	27402298	2.6	non-smoker	no	NA	NA	NA	NA			NA	NA	NA	NA	NA	NA	NA	NA	NA	NA	NA	NA
CRC	LB-CRC-21	LB-CRC-21-P-02	f	76	IV	NA	NA	yes	during	therapy	post_surgery_1	Surgery	Chemo	NA	Adenokarzinom	Colon	Ovary, Liver	NA	Plasma	166	8.4256	7.5	LB_WGS-SP-03	3.18	111758667	10029724	0.44	14022587	2.29	non-smoker	no	NA	NA	NA	NA			NA	NA	NA	NA	NA	NA	NA	NA	NA	NA	NA	NA
CRC	LB-CRC-21	LB-CRC-21-P-03	f	76	IV	NA	NA	yes	during	therapy	chemo_1	Surgery	Chemo	NA	Adenokarzinom	Colon	Ovary, Liver	NA	Plasma	168	7.816	6	LB_WGS-SP-03	4.28	149180473	12667440	0.42	13426666	2.08	non-smoker	no	NA	NA	NA	NA			NA	NA	NA	NA	NA	NA	NA	NA	NA	NA	NA	NA
CRC	LB-CRC-21	LB-CRC-21-S-01	f	76	IV	NA	NA	no	before			Surgery	Chemo	NA	Adenokarzinom	Colon	Ovary, Liver		Sputum	NA	NA	NA	LB_WGS-SP-01	1.01	44994853	11009851			NA	non-smoker	no	NA	NA	NA	NA			NA	NA	NA	NA	NA	NA	NA	NA	NA	NA	NA	NA
CRC	LB-CRC-21	LB-CRC-21-T-01	f	76	IV	NA	NA	yes	NA			Surgery	Chemo	NA	Adenokarzinom	Colon	Ovary, Liver		FFPE	NA	NA	NA	LB_WGS-SP-01	1.42	54469462	7681975			NA	non-smoker	no	NA	NA	NA	NA			NA	NA	NA	NA	NA	NA	NA	NA	NA	NA	NA	NA
CRC	LB-CRC-22	LB-CRC-22-P-01	m	53	III	C	R0	yes	before	diagnosis	baseline	Surgery	Chemo	-1	NA	NA	NA	NA	Plasma	165	3.9036	7.5	LB_WGS-SP-05	5.07	178750372	16735807	0.98	31184253	0.566536	non-smoker	no	NA	NA	NA	NA	NA	NA	NA	NA	NA	NA	NA	NA	NA	NA	NA	NA	NA	NA
CRC	LB-CRC-22	LB-CRC-22-P-02	m	53	III	C	R0	yes		therapy	post_surgery_1	Surgery	Chemo	6	NA	NA	NA	NA	Plasma	169	3.4866	5	LB_WGS-SP-05	6.35	225604150	22673372	1.12	35741559	0.471201	non-smoker	no	NA	NA	NA	NA	NA	NA	NA	NA	NA	NA	NA	NA	NA	NA	NA	NA	NA	NA
CRC	LB-CRC-22	LB-CRC-22-S-01	m	53	III	C	R0	yes	NA			Surgery	Chemo	-1	NA	NA	NA	NA	Sputum				LB_WGS-SP-06	0.66	27220416	4607106			NA	non-smoker	no	NA	NA	NA	NA	NA	NA	NA	NA	NA	NA	NA	NA	NA	NA	NA	NA	NA	NA
CRC	LB-CRC-22	LB-CRC-22-T-01	m	53	III	C	R0	yes	NA			Surgery	Chemo	NA	NA	NA	NA	NA	FFPE				LB_WGS-SP-06	0.71	27909162	4338666			NA	non-smoker	no	NA	NA	NA	NA	NA	NA	NA	NA	NA	NA	NA	NA	NA	NA	NA	NA	NA	NA
CRC	LB-CRC-25	LB-CRC-25-P-02	m	77	III	B	R0	yes	after	therapy	post_surgery_1	Surgery	Chemo	20	Adenokarzinom	Rectum	NA	MSS	Plasma	175	12.41	7	LB_WGS-SP-02	7.87	291572564	38303606	1.52	49004739	4.15	non-smoker	yes	KRAS	p.G13D	NA	NA			NA	NA	NA	0.11	0.26	0.41	0.4627	0.2621	0.1089	0.948092	182.734	0.516158
CRC	LB-CRC-25	LB-CRC-25-S-01	m	77	III	B	NA	yes	before			Surgery	Chemo	NA	Adenokarzinom	Rectum	NA	MSS	Sputum	NA	NA	NA	LB_WGS-SP-01	0.06	43537116	41502861			NA	non-smoker	no	KRAS	p.G13D	NA	NA			NA	NA	NA	NA	NA	NA	NA	NA	NA	NA	NA	NA
CRC	LB-CRC-25	LB-CRC-25-T-01	m	77	III	B	R0	yes	NA			Surgery	Chemo	NA	Adenokarzinom	Rectum	NA	MSS	FFPE	NA	NA	NA	LB_WGS-SP-01	1.23	45621763	5012338			NA	non-smoker	yes	KRAS	p.G13D	NA	NA			NA	NA	NA	0.11	0.26	0.41	0.4627	0.2621	0.1089	13.1	49.92	20.79
CRC	LB-CRC-27	LB-CRC-27-P-01	m	78	IV	A	lokoregionär R0, R2 (Leber)	NA	before	diagnosis	baseline	Surgery	Chemo	-1	Adenokarzinom	Rectum	Liver	NA	Plasma	166	27.05	7	LB_WGS-SP-02	4.87	176982272	20535124	0.84	26984813	1.17	non-smoker	no	NA	NA	NA	NA			NA	NA	NA	NA	NA	NA	NA	NA	NA	NA	NA	NA
CRC	LB-CRC-27	LB-CRC-27-P-02	m	78	IV	A	lokoregionär R0, R2 (Leber)	NA	during	therapy	post_surgery_1	Surgery	Chemo	7	Adenokarzinom	Rectum	Liver	NA	Plasma	168	17.8304	7.5	LB_WGS-SP-03	15.94	571826362	61771643	1.78	56997252	0.71	non-smoker	no	NA	NA	NA	NA			NA	NA	NA	NA	NA	NA	NA	NA	NA	NA	NA	NA
CRC	LB-CRC-27	LB-CRC-27-S-01	m	78	IV	A	lokoregionär R0, R2 (Leber)	NA	before			Surgery	Chemo	0	Adenokarzinom	Rectum	Liver	NA	Sputum			NA	LB_WGS-SP-01	1	37739639	5017759			NA	non-smoker	no	NA	NA	NA	NA			NA	NA	NA	NA	NA	NA	NA	NA	NA	NA	NA	NA
CRC	LB-CRC-27	LB-CRC-27-T-01	m	78	IV	A	lokoregionär R0, R2 (Leber)	NA	NA			Surgery	Chemo	0	Adenokarzinom	Rectum	Liver	NA	FFPE			NA	LB_WGS-SP-01	1.34	49178796	5492528			NA	non-smoker	no	NA	NA	NA	NA			NA	NA	NA	NA	NA	NA	NA	NA	NA	NA	NA	NA
CRC	LB-CRC-28	LB-CRC-28-P-01	w	76	I	NA	R0	NA	before	diagnosis	baseline	Surgery	NA	-2	Adenokarzinom	Colon Transversum	NA	NA	Plasma	169	3.288	5.5	LB_WGS-SP-05	4.99	173671118	14378131	0.38	12097384	0.383011	non-smoker	no	NA	NA	NA	NA	NA	NA	NA	NA	NA	NA	NA	NA	NA	NA	NA	NA	NA	NA
CRC	LB-CRC-28	LB-CRC-28-P-02	w	76	I	NA	R0	NA	after	remission	post_surgery_1	Surgery	NA	7	Adenokarzinom	Colon Transversum	NA	NA	Plasma	167	4.692	5.5	LB_WGS-SP-05	5.54	194331397	17263517	0.68	21702667	0.457477	non-smoker	no	NA	NA	NA	NA	NA	NA	NA	NA	NA	NA	NA	NA	NA	NA	NA	NA	NA	NA
CRC	LB-CRC-28	LB-CRC-28-S-01	w	76	I	NA	R0	NA				Surgery	NA	-2	Adenokarzinom	Colon Transversum	NA	NA	Sputum				LB_WGS-SP-06	0.48	20888188	4770513			NA	non-smoker	no	NA	NA	NA	NA	NA	NA	NA	NA	NA	NA	NA	NA	NA	NA	NA	NA	NA	NA
CRC	LB-CRC-28	LB-CRC-28-T-01	w	76	I	NA	R0	NA				Surgery	NA	NA	Adenokarzinom	Colon Transversum	NA	NA	FFPE				LB_WGS-SP-06	1.22	49632683	9854959			NA	non-smoker	no	NA	NA	NA	NA	NA	NA	NA	NA	NA	NA	NA	NA	NA	NA	NA	NA	NA	NA
CRC	LB-CRC-29	LB-CRC-29-P-01	m	83	III	B	NA	NA	before	diagnosis	baseline	Surgery	Chemo	-2	Adenokarzinom	Colon ascendens	NA	NA	Plasma	174	9.13	7	LB_WGS-SP-02	6.85	251057669	30785522	1.04	33515456	1.92	non-smoker	yes	KRAS	SNVs	NA	NA			NA	NA	NA	0.11	0.26	0.41	0.4627	0.2621	0.1089	0.221094	190.745	0.115777
CRC	LB-CRC-29	LB-CRC-29-P-08	m	83	III	B	R0	no	after	remission	post_chemo_1	Surgery	Chemo	426	Adenokarzinom	Colon ascendens	NA	NA	Plasma	170	2.0208	5	LB_WGS-SP-03	9.55	337876499	32455213	0.98	31300246	1.34866	non-smoker	no	KRAS	SNVs	NA	NA			NA	NA	NA	NA	NA	NA	NA	NA	NA	NA	NA	NA
CRC	LB-CRC-29	LB-CRC-29-P-09	m	83	III	B	R0		after	remission	post_chemo_1	Surgery	Chemo	544	Adenokarzinom	Colon ascendens	NA	NA	Plasma	169	5.52171	3.5	LB_WGS-SP-03	12.38	433541043	38408004	1.24	39511277	0.66	non-smoker	no	KRAS	SNVs	NA	NA			NA	NA	NA	NA	NA	NA	NA	NA	NA	NA	NA	NA
CRC	LB-CRC-29	LB-CRC-29-S-01	m	83	III	B	R0	NA	before			Surgery	Chemo	#REF!	Adenokarzinom	Colon ascendens	NA	NA	Sputum	NA	NA	NA	LB_WGS-SP-01	0.22	8536520	1347887			NA	non-smoker	no	KRAS	SNVs	NA	NA			NA	NA	NA	NA	NA	NA	NA	NA	NA	NA	NA	NA
CRC	LB-CRC-29	LB-CRC-29-T-01	m	83	III	B	R0	NA	NA			Surgery	Chemo	NA	Adenokarzinom	Colon ascendens	NA	NA	FFPE	NA	NA	NA	LB_WGS-SP-01	1.56	66628176	12146386			NA	non-smoker	yes	KRAS	SNVs	NA	NA			NA	NA	NA	0.11	0.26	0.41	0.4627	0.2621	0.1089	9.99997	39.6044	20.1594
CRC	LB-CRC-31	LB-CRC-31-P-01	m	74	II	A	R0	NA	before	diagnosis	baseline	Surgery	NA	0	Adenokarzinom	Colon Transversum	NA	MSS	Plasma	170	2.38292	6.5	LB_WGS-SP-05	6.64	232161694	20324606	0.74	23656114	0.736907	non-smoker	no	NA	NA	NA	NA	NA	NA	NA	NA	NA	NA	NA	NA	NA	NA	NA	NA	NA	NA
CRC	LB-CRC-31	LB-CRC-31-P-02	m	74	II	A	R0	NA	after	remission	post_surgery_1	Surgery	NA	5	Adenokarzinom	Colon Transversum	NA	MSS	Plasma	160	25.2008	7.5	LB_WGS-SP-05	5.94	208105245	18344831	0.79	25374046	0.627601	non-smoker	no	NA	NA	NA	NA	NA	NA	NA	NA	NA	NA	NA	NA	NA	NA	NA	NA	NA	NA
CRC	LB-CRC-31	LB-CRC-31-S-01	m	74	II	A	R0	NA	NA			Surgery	NA	0	Adenokarzinom	Colon Transversum	NA	MSS	Sputum				LB_WGS-SP-06	0.74	32858461	7688550			NA	non-smoker	no	NA	NA	NA	NA	NA	NA	NA	NA	NA	NA	NA	NA	NA	NA	NA	NA	NA	NA
CRC	LB-CRC-31	LB-CRC-31-T-01	m	74	II	A	R0		NA			Surgery	NA	NA	Adenokarzinom	Colon Transversum	NA	MSS	FFPE				LB_WGS-SP-06	0.93	34916173	3966821			NA	non-smoker	no	NA	NA	NA	NA	NA	NA	NA	NA	NA	NA	NA	NA	NA	NA	NA	NA	NA	NA
CRC	LB-CRC-32	LB-CRC-32-P-01	w	73	IV		R1	NA	before	diagnosis	baseline	NA	Chemo	0	Adenokarzinom	Rectum	Liver	MSS	Plasma	161	57.34	7.5	LB_WGS-SP-02	5.47	199344964	23762121	1.83	58481969	58.2642	non-smoker	yes	BRAF	p.V600E	NA	NA			NA	NA	NA	0.02	0.4	0.52	0.5236	0.3632	0.1489	446.144	488.198	47.7496
CRC	LB-CRC-32	LB-CRC-32-P-02	f	73	IV		R1	yes	before	therapy	pal_chemo	NA	Chemo	5	Adenokarzinom	Rectum	Liver	MSS	Plasma	166	47.46	7.5	LB_WGS-SP-02	7.49	279360577	36107364	2.38	76797705	41.4669	non-smoker	yes	BRAF	p.V600E	NA	NA			NA	NA	NA	0.02	0.4	0.52	0.5236	0.3632	0.1489	518.093	699.385	42.5546
CRC	LB-CRC-32	LB-CRC-32-P-03	f	73	IV		R1	yes	before	therapy	pal_chemo	NA	Chemo	20	Adenokarzinom	Rectum	Liver	MSS	Plasma	166	67.31	7.5	LB_WGS-SP-02	7	263237892	36734025	2.3	74131736	>62.5	non-smoker	yes	BRAF	p.V600E	NA	NA			NA	NA	NA	0.02	0.4	0.52	0.5236	0.3632	0.1489	239.257	308.959	43.6428
CRC	LB-CRC-32	LB-CRC-32-P-04	f	73	IV		R1	yes	before	therapy	pal_chemo	NA	Chemo	34	Adenokarzinom	Rectum	Liver	MSS	Plasma	164	16.3	7.5	LB_WGS-SP-02	8.66	316630482	36062836	2.54	81621568	55.7954	non-smoker	yes	BRAF	p.V600E	NA	NA			NA	NA	NA	0.02	0.4	0.52	0.5236	0.3632	0.1489	54.0841	389.596	12.1899
CRC	LB-CRC-32	LB-CRC-32-P-08	f	73	IV		R1	yes	before	therapy	pal_chemo	NA	Chemo	104	Adenokarzinom	Rectum	Liver	MSS	Plasma	156	18.47	7.5	LB_WGS-SP-02	7.97	296568555	39994889	1.44	46138126	1.86	non-smoker	yes	BRAF	p.V600E	NA	NA			NA	NA	NA	0.02	0.4	0.52	0.5236	0.3632	0.1489	0.0288496	122.32	0.0235798
CRC	LB-CRC-32	LB-CRC-32-P-09	f	73	IV		R1	yes	before	therapy	pal_chemo	NA	Chemo	132	Adenokarzinom	Rectum	Liver	MSS	Plasma	168	13.57	7.5	LB_WGS-SP-02	8.18	299942619	37159036	1.83	58575037	1.28	non-smoker	yes	BRAF	p.V600E	NA	NA			NA	NA	NA	0.02	0.4	0.52	0.5236	0.3632	0.1489	0	161.24	0
CRC	LB-CRC-32	LB-CRC-32-P-10	f	73	IV		R1	no	before	therapy	pal_chemo	NA	Chemo	174	Adenokarzinom	Rectum	Liver	MSS	Plasma	177	31.66	7.5	LB_WGS-SP-02	8.3	299258045	33465857	1.5	48004170	1.25	non-smoker	yes	BRAF	p.V600E	NA	NA			NA	NA	NA	0.02	0.4	0.52	0.5236	0.3632	0.1489	0.08	312.58	0.03
CRC	LB-CRC-32	LB-CRC-32-P-11	f	73	IV		R1	no	before	partial_remission	pal_chemo	NA	Chemo	188	Adenokarzinom	Rectum	Liver	MSS	Plasma	171	18.8	6	LB_WGS-SP-02	6.9	260789803	39513055	1.04	33492743	1.35	non-smoker	yes	BRAF	p.V600E	NA	NA			NA	NA	NA	0.02	0.4	0.52	0.5236	0.3632	0.1489	0.0291361	176.285	0.0165251
CRC	LB-CRC-32	LB-CRC-32-P-12	f	73	IV		R1	no	before	partial_remission	pal_chemo	NA	Chemo	195	Adenokarzinom	Rectum	Liver	MSS	Plasma	180	24.61	7.5	LB_WGS-SP-02	5.43	203727362	29643681	0.94	30033340	1.46	non-smoker	yes	BRAF	p.V600E	NA	NA			NA	NA	NA	0.02	0.4	0.52	0.5236	0.3632	0.1489	0.0574406	218.074	0.026333
CRC	LB-CRC-32	LB-CRC-32-P-15	f	73	IV		R1	yes	before	partial_remission	pal_chemo	NA	Chemo	265	Adenokarzinom	Rectum	Liver	MSS	Plasma	169	20.55	7.5	LB_WGS-SP-02	5.24	197362095	28228355	0.78	25238250	0.87	non-smoker	yes	BRAF	p.V600E	NA	NA			NA	NA	NA	0.02	0.4	0.52	0.5236	0.3632	0.1489	0.363806	354.283	0.102582
CRC	LB-CRC-32	LB-CRC-32-P-16	f	73	IV		R1	yes	before	partial_remission	pal_chemo	NA	Chemo	279	Adenokarzinom	Rectum	Liver	MSS	Plasma	173	18.91	7.5	LB_WGS-SP-02	5.09	191048526	25855456	0.74	24069756	1.09	non-smoker	yes	BRAF	p.V600E	NA	NA			NA	NA	NA	0.02	0.4	0.52	0.5236	0.3632	0.1489	0.0735302	316.106	0.0232558
CRC	LB-CRC-32	LB-CRC-32-P-17	f	73	IV		R1	yes	before	partial_remission	pal_chemo	NA	Chemo	258	Adenokarzinom	Rectum	Liver	MSS	Plasma	168	6.572	7.5	LB_WGS-SP-03	3.8	134229690	12950320	0.52	16522763	1.78	non-smoker	no	BRAF	p.V600E	NA	NA			NA	NA	NA	NA	NA	NA	NA	NA	NA	NA	NA	NA
CRC	LB-CRC-32	LB-CRC-32-P-18	f	73	IV		R1	yes	before	partial_remission	pal_chemo	NA	Chemo	272	Adenokarzinom	Rectum	Liver	MSS	Plasma	167	3.7848	7.5	LB_WGS-SP-03	2.58	92779402	9980853	0.36	11539436	2.03	non-smoker	no	BRAF	p.V600E	NA	NA			NA	NA	NA	NA	NA	NA	NA	NA	NA	NA	NA	NA
CRC	LB-CRC-32	LB-CRC-32-P-19	f	73	IV		R1	yes	before	partial_remission	pal_chemo	NA	Chemo	286	Adenokarzinom	Rectum	Liver	MSS	Plasma	167	5.8808	7.5	LB_WGS-SP-03	7.81	274973250	25674601	1.03	32802919	0.93	non-smoker	no	BRAF	p.V600E	NA	NA			NA	NA	NA	NA	NA	NA	NA	NA	NA	NA	NA	NA
CRC	LB-CRC-32	LB-CRC-32-P-20	f	73	IV		R1	yes	before	partial_remission	pal_chemo	NA	Chemo	301	Adenokarzinom	Rectum	Liver	MSS	Plasma	165	8.128	7.5	LB_WGS-SP-03	6.73	235567441	20652840	1.18	37796858	2.74	non-smoker	no	BRAF	p.V600E	NA	NA			NA	NA	NA	NA	NA	NA	NA	NA	NA	NA	NA	NA
CRC	LB-CRC-32	LB-CRC-32-P-21	f	73	IV		R1	no	before	partial_remission	pal_chemo	NA	Chemo	314	Adenokarzinom	Rectum	Liver	MSS	Plasma	169	8.0504	7.5	LB_WGS-SP-03	4.48	157417484	14297820	0.77	24715790	2.29855	non-smoker	no	BRAF	p.V600E	NA	NA			NA	NA	NA	NA	NA	NA	NA	NA	NA	NA	NA	NA
CRC	LB-CRC-32	LB-CRC-32-P-22	f	73	IV		R1	no	before	stable_disease	pal_chemo	NA	Chemo	328	Adenokarzinom	Rectum	Liver	MSS	Plasma	166	7.024	7.5	LB_WGS-SP-03	5.54	194077191	17074625	1.07	34311983	2.07	non-smoker	no	BRAF	p.V600E	NA	NA			NA	NA	NA	NA	NA	NA	NA	NA	NA	NA	NA	NA
CRC	LB-CRC-32	LB-CRC-32-P-23	f	73	IV		R1	yes	before	stable_disease	pal_chemo	NA	Chemo	342	Adenokarzinom	Rectum	Liver	MSS	Plasma	166	7.7656	7.5	LB_WGS-SP-03	4.03	141022882	12375275	0.7	22289115	2.4	non-smoker	no	BRAF	p.V600E	NA	NA			NA	NA	NA	NA	NA	NA	NA	NA	NA	NA	NA	NA
CRC	LB-CRC-32	LB-CRC-32-P-24	f	73	IV		R1		before	stable_disease	pal_chemo	NA	Chemo	370	Adenokarzinom	Rectum	Liver	MSS	Plasma	170	6.1736	7.5	LB_WGS-SP-03	3.29	117048057	11666701	0.56	18094451	2.87	non-smoker	no	BRAF	p.V600E	NA	NA			NA	NA	NA	NA	NA	NA	NA	NA	NA	NA	NA	NA
CRC	LB-CRC-32	LB-CRC-32-P-25	f	73	IV		R1		before	stable_disease	pal_chemo	NA	Chemo	398	Adenokarzinom	Rectum	Liver	MSS	Plasma	163	9.2744	7.5	LB_WGS-SP-03	4.39	153560238	13575121	0.9	28731665	3.42	non-smoker	no	BRAF	p.V600E	NA	NA			NA	NA	NA	NA	NA	NA	NA	NA	NA	NA	NA	NA
CRC	LB-CRC-32	LB-CRC-32-P-26	f	73	IV		R1		before	stable_disease	pal_chemo	NA	Chemo	414	Adenokarzinom	Rectum	Liver	MSS	Plasma	167	11.4848	7.5	LB_WGS-SP-03	4.84	169489814	14863605	0.87	27863311	5.11	non-smoker	no	BRAF	p.V600E	NA	NA			NA	NA	NA	NA	NA	NA	NA	NA	NA	NA	NA	NA
CRC	LB-CRC-32	LB-CRC-32-P-27	f	73	IV		R1		before	stable_disease	pal_chemo	NA	Chemo	482	Adenokarzinom	Rectum	Liver	MSS	Plasma	168	3.6656	7.5	LB_WGS-SP-03	4.41	166362483	22568477	0.99	32243221	10.7814	non-smoker	no	BRAF	p.V600E	NA	NA			NA	NA	NA	NA	NA	NA	NA	NA	NA	NA	NA	NA
CRC	LB-CRC-32	LB-CRC-32-P-28	f	73	IV		R1		before	progressive_disease	pal_chemo	NA	Chemo	495	Adenokarzinom	Rectum	Liver	MSS	Plasma	163	10.9477	7	LB_WGS-SP-03	4.18	147217670	13577389	0.9	28776499	17.8776	non-smoker	no	BRAF	p.V600E	NA	NA			NA	NA	NA	NA	NA	NA	NA	NA	NA	NA	NA	NA
CRC	LB-CRC-32	LB-CRC-32-S-01	f	73	IV		R1	yes	before			NA	Chemo		Adenokarzinom	Rectum	Liver	MSS	Sputum	NA	NA	NA	LB_WGS-SP-01	1.56	62354711	10080049			NA	non-smoker	no	BRAF	p.V600E	NA	NA			NA	NA	NA	NA	NA	NA	NA	NA	NA	NA	NA	NA
CRC	LB-CRC-32	LB-CRC-32-T-01	f	73	IV		R1		before			NA	Chemo	NA	Adenokarzinom	Rectum	Liver	MSS	FFPE	NA	NA	NA	LB_WGS-SP-03	0.99	36675797	4380478				non-smoker	no	BRAF	p.V600E	NA	NA			NA	NA	NA	NA	NA	NA	NA	NA	NA	NA	NA	NA
CRC	LB-CRC-33	LB-CRC-33-P-01	f	55	I	NA	R0	yes	before	diagnosis	baseline	Surgery	NA	0	Adenokarzinom	Rectum	NA	NA	Plasma	172	2.66733	4.5	LB_WGS-SP-05	5.22	181903083	15244232	0.51	16358841	0.231306	non-smoker	no	NA	NA	NA	NA	NA	NA	NA	NA	NA	NA	NA	NA	NA	NA	NA	NA	NA	NA
CRC	LB-CRC-33	LB-CRC-33-S-01	f	55	I	NA	R0	yes				Surgery	NA	0	Adenokarzinom	Rectum	NA	NA	Sputum				LB_WGS-SP-06	0.52	27700316	10610453			NA	non-smoker	no	NA	NA	NA	NA	NA	NA	NA	NA	NA	NA	NA	NA	NA	NA	NA	NA	NA	NA
CRC	LB-CRC-33	LB-CRC-33-T-01	f	55	I	NA	R0	no				Surgery	NA	NA	Adenokarzinom	Rectum	NA	NA	FFPE				LB_WGS-SP-06	1.08	37972523	2944634			NA	non-smoker	no	NA	NA	NA	NA	NA	NA	NA	NA	NA	NA	NA	NA	NA	NA	NA	NA	NA	NA
CRC	LB-CRC-34	LB-CRC-34-P-01	m	63	IV		R1	yes	before	diagnosis	baseline	NA	Chemo	0	Adenokarzinom	Rectum	Liver, Lung	MSS	Plasma	157	140.92	7.5	LB_WGS-SP-02	3.43	123862017	13529101	0.85	27372123	NA	non-smoker	no	NA	NA	NA	NA			NA	NA	NA	NA	NA	NA	NA	NA	NA	NA	NA	NA
CRC	LB-CRC-34	LB-CRC-34-P-02	m	63	IV		R1	yes	during	therapy	pal_chemo	NA	Chemo	14	Adenokarzinom	Rectum	Liver, Lung	MSS	Plasma	165	52.3312	7.5	LB_WGS-SP-03	5.58	198690231	19772556	1.42	45439790	57.134	non-smoker	no	NA	NA	NA	NA			NA	NA	NA	NA	NA	NA	NA	NA	NA	NA	NA	NA
CRC	LB-CRC-34	LB-CRC-34-P-03	m	63	IV		R1	yes	during	therapy	pal_chemo	NA	Chemo	28	Adenokarzinom	Rectum	Liver, Lung	MSS	Plasma	167	3.885	4	LB_WGS-SP-03	5.83	221519176	30579013	0.93	30690559	21.98	non-smoker	no	NA	NA	NA	NA			NA	NA	NA	NA	NA	NA	NA	NA	NA	NA	NA	NA
CRC	LB-CRC-34	LB-CRC-34-P-04	m	63	IV		R1	yes	during	therapy	pal_chemo	NA	Chemo	56	Adenokarzinom	Rectum	Liver, Lung	MSS	Plasma	168	7.8104	7.5	LB_WGS-SP-03	5.69	199602021	17809796	0.81	25731672	3.92	non-smoker	no	NA	NA	NA	NA			NA	NA	NA	NA	NA	NA	NA	NA	NA	NA	NA	NA
CRC	LB-CRC-34	LB-CRC-34-P-05	m	63	IV		R1	no	during	partial_remission	pal_chemo	NA	Chemo	112	Adenokarzinom	Rectum	Liver, Lung	MSS	Plasma	168	5.45314	7	LB_WGS-SP-03	7.93	281071013	27216232	1.18	37953724	0.66	non-smoker	no	NA	NA	NA	NA			NA	NA	NA	NA	NA	NA	NA	NA	NA	NA	NA	NA
CRC	LB-CRC-34	LB-CRC-34-P-06	m	63	IV		R1	yes	during	partial_remission	pal_chemo	NA	Chemo	140	Adenokarzinom	Rectum	Liver, Lung	MSS	Plasma	168	9.3168	7.5	LB_WGS-SP-03	7.13	249545621	22077577	0.96	30751300	0.45	non-smoker	no	NA	NA	NA	NA			NA	NA	NA	NA	NA	NA	NA	NA	NA	NA	NA	NA
CRC	LB-CRC-34	LB-CRC-34-P-07	m	63	IV		R1	yes	during	partial_remission	pal_chemo	NA	Chemo	151	Adenokarzinom	Rectum	Liver, Lung	MSS	Plasma	169	7.683	2	LB_WGS-SP-03	5.41	189268832	16533021	0.55	17443294	0.46	non-smoker	no	NA	NA	NA	NA			NA	NA	NA	NA	NA	NA	NA	NA	NA	NA	NA	NA
CRC	LB-CRC-34	LB-CRC-34-P-08	m	63	IV		R1	no	during	partial_remission	pal_chemo	NA	Chemo	167	Adenokarzinom	Rectum	Liver, Lung	MSS	Plasma	172	9.914	3	LB_WGS-SP-03	11.44	400437737	35225625	1.07	34035814	0.44	non-smoker	no	NA	NA	NA	NA			NA	NA	NA	NA	NA	NA	NA	NA	NA	NA	NA	NA
CRC	LB-CRC-34	LB-CRC-34-P-09	m	63	IV		R1	yes	during	stable_disease	post_chemo_1	NA	Chemo	210	Adenokarzinom	Rectum	Liver, Lung	MSS	Plasma	166	15.4234	3.5	LB_WGS-SP-03	8.03	281722472	25285017	1.53	49010809	2.18	non-smoker	no	NA	NA	NA	NA			NA	NA	NA	NA	NA	NA	NA	NA	NA	NA	NA	NA
CRC	LB-CRC-34	LB-CRC-34-P-10	m	63	IV		R1	yes	during	stable_disease	post_chemo_1	NA	Chemo	231	Adenokarzinom	Rectum	Liver, Lung	MSS	Plasma	165	28.254	5	LB_WGS-SP-03	6.32	222390575	20493934	1.46	46715584	6.51	non-smoker	no	NA	NA	NA	NA			NA	NA	NA	NA	NA	NA	NA	NA	NA	NA	NA	NA
CRC	LB-CRC-34	LB-CRC-34-P-11	m	63	IV		R1	no	during	stable_disease	chemo_2	NA	Chemo	245	Adenokarzinom	Rectum	Liver, Lung	MSS	Plasma	172	5.07867	4.5	LB_WGS-SP-03	5.16	187175317	21350589	0.59	19210812	3.02	non-smoker	no	NA	NA	NA	NA			NA	NA	NA	NA	NA	NA	NA	NA	NA	NA	NA	NA
CRC	LB-CRC-34	LB-CRC-34-P-12	m	63	IV		R1	no	during	stable_disease	chemo_2	NA	Chemo	259	Adenokarzinom	Rectum	Liver, Lung	MSS	Plasma	172	2.239	6	LB_WGS-SP-03	6.36	238936416	32470574	0.79	25906343	1.97	non-smoker	no	NA	NA	NA	NA			NA	NA	NA	NA	NA	NA	NA	NA	NA	NA	NA	NA
CRC	LB-CRC-34	LB-CRC-34-P-13	m	63	IV		R1	yes	during	stable_disease	chemo_2	NA	Chemo	273	Adenokarzinom	Rectum	Liver, Lung	MSS	Plasma	167	6.5352	5	LB_WGS-SP-03	4.1	143963699	12983107	0.58	18454656	2.58	non-smoker	no	NA	NA	NA	NA			NA	NA	NA	NA	NA	NA	NA	NA	NA	NA	NA	NA
CRC	LB-CRC-34	LB-CRC-34-P-14	m	63	IV		R1	yes	during	progressive_disease	chemo_2	NA	Chemo	287	Adenokarzinom	Rectum	Liver, Lung	MSS	Plasma	172	5.61138	6.5	LB_WGS-SP-03	9.34	327127247	29043099	1.05	33515163	3.92	non-smoker	no	NA	NA	NA	NA			NA	NA	NA	NA	NA	NA	NA	NA	NA	NA	NA	NA
CRC	LB-CRC-34	LB-CRC-34-P-15	m	63	IV		R1	no	during	progressive_disease	chemo_3	NA	Chemo	315	Adenokarzinom	Rectum	Liver, Lung	MSS	Plasma	171	3.846	5	LB_WGS-SP-03	7.3	258153828	24782130	0.88	28165675	7.1	non-smoker	no	NA	NA	NA	NA			NA	NA	NA	NA	NA	NA	NA	NA	NA	NA	NA	NA
CRC	LB-CRC-34	LB-CRC-34-S-01	m	63	IV		R1	yes	before			NA	Chemo	NA	Adenokarzinom	Rectum	Liver, Lung	MSS	Sputum			NA	LB_WGS-SP-01	1.3	47596934	5143338			NA	non-smoker	no	NA	NA	NA	NA			NA	NA	NA	NA	NA	NA	NA	NA	NA	NA	NA	NA
CRC	LB-CRC-34	LB-CRC-34-T-01	m	63	IV		R1	yes	during			NA	Chemo	NA	Adenokarzinom	Rectum	Liver, Lung	MSS	FFPE			NA	LB_WGS-SP-01	1.24	43849133	3876109			NA	non-smoker	no	NA	NA	NA	NA			NA	NA	NA	NA	NA	NA	NA	NA	NA	NA	NA	NA
CRC	LB-CRC-35	LB-CRC-35-P-01	m	48	III		R0	yes	before	diagnosis	baseline	Surgery	Chemo	0	Adenokarzinom	Rectum	NA	MSS	Plasma	171	7.7	7.5	LB_WGS-SP-02	3.54	129262318	15957486	0.67	21306842	11.97	non-smoker	no	NA	NA	NA	NA			NA	NA	NA	NA	NA	NA	NA	NA	NA	NA	NA	NA
CRC	LB-CRC-35	LB-CRC-35-P-02	m	48	III		R0	yes	during	therapy	post_surgery_1	Surgery	Chemo	146	Adenokarzinom	Rectum	NA	MSS	Plasma	168	4.5176	7.5	LB_WGS-SP-03	6.68	234513321	21407798	0.76	24267101	0.23	non-smoker	no	NA	NA	NA	NA			NA	NA	NA	NA	NA	NA	NA	NA	NA	NA	NA	NA
CRC	LB-CRC-35	LB-CRC-35-P-03	m	48	III		R0	no	during	therapy	chemo_2	Surgery	Chemo	192	Adenokarzinom	Rectum	NA	MSS	Plasma	175	1.52945	5.5	LB_WGS-SP-03	2	72565589	7727624	0.29	9290863	0.48	non-smoker	no	NA	NA	NA	NA			NA	NA	NA	NA	NA	NA	NA	NA	NA	NA	NA	NA
CRC	LB-CRC-35	LB-CRC-35-P-04	m	48	III		R0	no	during	therapy	chemo_2	Surgery	Chemo	226	Adenokarzinom	Rectum	NA	MSS	Plasma	172	1.9056	7.5	LB_WGS-SP-03	7.57	267632883	25860171	0.83	26457267	0.1	non-smoker	no	NA	NA	NA	NA			NA	NA	NA	NA	NA	NA	NA	NA	NA	NA	NA	NA
CRC	LB-CRC-35	LB-CRC-35-P-05	m	48	III		R0		after	remission	post_chemo_2	Surgery	Chemo	325	Adenokarzinom	Rectum	NA	MSS	Plasma	172	1.3632	5	LB_WGS-SP-03	6.42	225641123	20614690	0.76	24193722	0.91	non-smoker	no	NA	NA	NA	NA			NA	NA	NA	NA	NA	NA	NA	NA	NA	NA	NA	NA
CRC	LB-CRC-35	LB-CRC-35-P-06	m	48	III		R0		after	remission	post_chemo_2	Surgery	Chemo	329	Adenokarzinom	Rectum	NA	MSS	Plasma	173	1.596	6	LB_WGS-SP-03	5.82	204486437	18778805	0.76	24187756	1.14	non-smoker	no	NA	NA	NA	NA			NA	NA	NA	NA	NA	NA	NA	NA	NA	NA	NA	NA
CRC	LB-CRC-35	LB-CRC-35-P-07	m	48	III		R0		after	remission	post_chemo_2	Surgery	Chemo	423	Adenokarzinom	Rectum	NA	MSS	Plasma	169	2.079	4	LB_WGS-SP-03	5.38	188911518	17092917	0.74	23549360	0.54	non-smoker	no	NA	NA	NA	NA			NA	NA	NA	NA	NA	NA	NA	NA	NA	NA	NA	NA
CRC	LB-CRC-35	LB-CRC-35-S-01	m	48	III		R0	no	before			Surgery	Chemo	0	Adenokarzinom	Rectum	NA	MSS	Sputum	NA	NA	NA	LB_WGS-SP-01	1.37	49243430	4824497			NA	non-smoker	no	NA	NA	NA	NA			NA	NA	NA	NA	NA	NA	NA	NA	NA	NA	NA	NA
CRC	LB-CRC-35	LB-CRC-35-T-01	m	48	III		R0	yes	NA			Surgery	Chemo	NA	Adenokarzinom	Rectum	NA	MSS	FFPE	NA	NA	NA	LB_WGS-SP-01	1.4	49616856	4407500			NA	non-smoker	no	NA	NA	NA	NA			NA	NA	NA	NA	NA	NA	NA	NA	NA	NA	NA	NA
CRC	LB-CRC-36	LB-CRC-36-P-01	f	78	IV	A	R0	yes	before	diagnosis	baseline	Surgery	NA	-1	Adenokarzinom	Coecum	Liver	MSI	Plasma	166	19.45	7.5	LB_WGS-SP-03	8.93	311256581	26042102	1.46	46604865	1.71	non-smoker	no	NA	NA	NA	NA			NA	NA	NA	NA	NA	NA	NA	NA	NA	NA	NA	NA
CRC	LB-CRC-36	LB-CRC-36-P-02	f	78	IV	A	R0	yes	after	therapy	post_surgery_1	Surgery	NA	6	Adenokarzinom	Coecum	Liver	MSI	Plasma	169	48.9824	7.5	LB_WGS-SP-03	6.18	232697327	31987073	0.97	31644918	1.27	non-smoker	no	NA	NA	NA	NA			NA	NA	NA	NA	NA	NA	NA	NA	NA	NA	NA	NA
CRC	LB-CRC-36	LB-CRC-36-S-01	f	78	IV	A	R0	yes	before			Surgery	NA	-1	Adenokarzinom	Coecum	Liver	MSI	Sputum	NA	NA	NA	LB_WGS-SP-01	1.08	50667225	14862903			NA	non-smoker	no	NA	NA	NA	NA			NA	NA	NA	NA	NA	NA	NA	NA	NA	NA	NA	NA
CRC	LB-CRC-36	LB-CRC-36-T-01	f	78	IV	A	R0	yes	NA			Surgery	NA	NA	Adenokarzinom	Coecum	Liver	MSI	FFPE	NA	NA	NA	LB_WGS-SP-01	1.09	43546728	7135845			NA	non-smoker	no	NA	NA	NA	NA			NA	NA	NA	NA	NA	NA	NA	NA	NA	NA	NA	NA
CRC	LB-CRC-38	LB-CRC-38-P-01	m	69	IV	C	NA	yes	after	diagnosis	baseline	Surgery	Chemo	-1	Adenokarzinom	Coecum, Colon ascendens	Peritoneum	NA	Plasma	161	20.1	7	LB_WGS-SP-02	6.08	220821545	26009975	1.47	47050810	1.07	non-smoker	yes	BRAF	p.V600E	NA	NA			NA	NA	NA	0.02	0.4	0.52	0.5236	0.3632	0.1489	2.64	324.17	0.81
CRC	LB-CRC-38	LB-CRC-38-P-02	m	69	IV	C	NA	yes	after	therapy	post_surgery_1	Surgery	Chemo	5	Adenokarzinom	Coecum, Colon ascendens	Peritoneum	NA	Plasma	168	47.5	7.5	LB_WGS-SP-02	5.43	205494014	29316037	1.25	40259109	0.92	non-smoker	yes	BRAF	p.V600E	NA	NA			NA	NA	NA	0.02	0.4	0.52	0.5236	0.3632	0.1489	21.53	1050.79	2.01
CRC	LB-CRC-38	LB-CRC-38-P-03	m	69	IV	C	NA	no	after	therapy	post_surgery_1	Surgery	Chemo	29	Adenokarzinom	Coecum, Colon ascendens	Peritoneum	NA	Plasma	163	49.55	5	LB_WGS-SP-02	6	220689774	27821068	1.73	55500918	1.19	non-smoker	yes	BRAF	p.V600E	NA	NA			NA	NA	NA	0.02	0.4	0.52	0.5236	0.3632	0.1489	2.87	427.76	0.67
CRC	LB-CRC-38	LB-CRC-38-P-04	m	69	IV	C	NA	yes	after	therapy	pal_chemo	Surgery	Chemo	85	Adenokarzinom	Coecum, Colon ascendens	Peritoneum	NA	Plasma	177	172.54	7	LB_WGS-SP-02	6.58	245208493	34035319	1.26	40479328	4.35	non-smoker	yes	BRAF	p.V600E	NA	NA			NA	NA	NA	0.02	0.4	0.52	0.5236	0.3632	0.1489	0	274.02	0
CRC	LB-CRC-38	LB-CRC-38-P-05	m	69	IV	C	NA	yes	after	stable_disease	pal_chemo	Surgery	Chemo	139	Adenokarzinom	Coecum, Colon ascendens	Peritoneum	NA	Plasma	171	39.13	4.5	LB_WGS-SP-02	5.51	202740204	26481305	1.03	32940436	1.14	non-smoker	yes	BRAF	p.V600E	NA	NA			NA	NA	NA	0.02	0.4	0.52	0.5236	0.3632	0.1489	0.0309716	267.208	0.0115895
CRC	LB-CRC-38	LB-CRC-38-P-06	m	69	IV	C	NA	yes	after	stable_disease	pal_chemo	Surgery	Chemo	159	Adenokarzinom	Coecum, Colon ascendens	Peritoneum	NA	Plasma	168	30.25	7.5	LB_WGS-SP-02	5.6	214592757	34142288	1.32	42221057	0.83	non-smoker	yes	BRAF	p.V600E	NA	NA			NA	NA	NA	0.02	0.4	0.52	0.5236	0.3632	0.1489	0.0898618	375.896	0.0239003
CRC	LB-CRC-38	LB-CRC-38-P-07	m	69	IV	C	NA	yes	after	stable_disease	pal_chemo	Surgery	Chemo	183	Adenokarzinom	Coecum, Colon ascendens	Peritoneum	NA	Plasma	168	30.28	7	LB_WGS-SP-02	6.43	252321824	45909840	1.27	40694003	0.76	non-smoker	yes	BRAF	p.V600E	NA	NA			NA	NA	NA	0.02	0.4	0.52	0.5236	0.3632	0.1489	0.195346	365.297	0.0534474
CRC	LB-CRC-38	LB-CRC-38-P-08	m	69	IV	C	NA	no	after	stable_disease	pal_chemo	Surgery	Chemo	211	Adenokarzinom	Coecum, Colon ascendens	Peritoneum	NA	Plasma	172	33.83	6	LB_WGS-SP-02	5.46	205146037	30083921	0.94	30225426	0.48	non-smoker	no	BRAF	p.V600E	NA	NA			NA	NA	NA	NA	NA	NA	NA	NA	NA	NA	NA	NA
CRC	LB-CRC-38	LB-CRC-38-P-09	m	69	IV	C	NA	yes	after	stable_disease	pal_chemo	Surgery	Chemo	230	Adenokarzinom	Coecum, Colon ascendens	Peritoneum	NA	Plasma	167	20.118	6	LB_WGS-SP-03	6.15	216159720	19926192	0.73	23471085	1.75	non-smoker	no	BRAF	p.V600E	NA	NA			NA	NA	NA	NA	NA	NA	NA	NA	NA	NA	NA	NA
CRC	LB-CRC-38	LB-CRC-38-P-10	m	69	IV	C	NA	yes	after	stable_disease	pal_chemo	Surgery	Chemo	247	Adenokarzinom	Coecum, Colon ascendens	Peritoneum	NA	Plasma	165	17.44	3	LB_WGS-SP-03	6	211126098	19571686	0.88	27965086	0.45	non-smoker	no	BRAF	p.V600E	NA	NA			NA	NA	NA	NA	NA	NA	NA	NA	NA	NA	NA	NA
CRC	LB-CRC-38	LB-CRC-38-P-11	m	69	IV	C	NA	yes	after	stable_disease	pal_chemo	Surgery	Chemo	288	Adenokarzinom	Coecum, Colon ascendens	Peritoneum	NA	Plasma	168	15.411	6	LB_WGS-SP-03	5.4	189962784	17492472	0.73	23387444	1	non-smoker	no	BRAF	p.V600E	NA	NA			NA	NA	NA	NA	NA	NA	NA	NA	NA	NA	NA	NA
CRC	LB-CRC-38	LB-CRC-38-P-12	m	69	IV	C	NA		after	stable_disease	pal_chemo	Surgery	Chemo	313	Adenokarzinom	Coecum, Colon ascendens	Peritoneum	NA	Plasma	168	15.4509	7	LB_WGS-SP-03	10.65	374231647	34175017	1.42	45525011	0.82	non-smoker	no	BRAF	p.V600E	NA	NA			NA	NA	NA	NA	NA	NA	NA	NA	NA	NA	NA	NA
CRC	LB-CRC-38	LB-CRC-38-P-13	m	69	IV	C	NA		after	stable_disease	pal_chemo	Surgery	Chemo	345	Adenokarzinom	Coecum, Colon ascendens	Peritoneum	NA	Plasma	173	4.51527	5.5	LB_WGS-SP-03	3.08	113506521	13748400	0.33	10741378	0.91	non-smoker	no	BRAF	p.V600E	NA	NA			NA	NA	NA	NA	NA	NA	NA	NA	NA	NA	NA	NA
CRC	LB-CRC-38	LB-CRC-38-P-14	m	69	IV	C	NA		after	stable_disease	pal_chemo	Surgery	Chemo	373	Adenokarzinom	Coecum, Colon ascendens	Peritoneum	NA	Plasma	170	7.243	6	LB_WGS-SP-03	6.99	245646507	22486680	0.8	25687653	0.73	non-smoker	no	BRAF	p.V600E	NA	NA			NA	NA	NA	NA	NA	NA	NA	NA	NA	NA	NA	NA
CRC	LB-CRC-38	LB-CRC-38-P-15	m	69	IV	C	NA		after	stable_disease	pal_chemo	Surgery	Chemo	421	Adenokarzinom	Coecum, Colon ascendens	Peritoneum	NA	Plasma	169	5.602	6	LB_WGS-SP-03	7.94	278799066	25351363	0.8	25539141	0.63	non-smoker	no	BRAF	p.V600E	NA	NA			NA	NA	NA	NA	NA	NA	NA	NA	NA	NA	NA	NA
CRC	LB-CRC-38	LB-CRC-38-P-16	m	69	IV	C	NA		after	stable_disease	pal_chemo	Surgery	Chemo	447	Adenokarzinom	Coecum, Colon ascendens	Peritoneum	NA	Plasma	171	2.892	7.5	LB_WGS-SP-03	5.2	184282792	18041629	0.59	18986219	0.738019	non-smoker	no	BRAF	p.V600E	NA	NA			NA	NA	NA	NA	NA	NA	NA	NA	NA	NA	NA	NA
CRC	LB-CRC-38	LB-CRC-38-S-01	m	69	IV	C	NA	no	after			Surgery	Chemo		Adenokarzinom	Coecum, Colon ascendens	Peritoneum	NA	Sputum	NA	NA	NA	LB_WGS-SP-01	1.18	44692603	5421079			NA	non-smoker	no	BRAF	p.V600E	NA	NA			NA	NA	NA	NA	NA	NA	NA	NA	NA	NA	NA	NA
CRC	LB-CRC-38	LB-CRC-38-T-01	m	69	IV	C	NA	yes	after			Surgery	Chemo	NA	Adenokarzinom	Coecum, Colon ascendens	Peritoneum	NA	FFPE	NA	NA	NA	LB_WGS-SP-01	1.33	46911320	3894644			NA	non-smoker	yes	BRAF	p.V600E	NA	NA			NA	NA	NA	0.02	0.4	0.52	0.5236	0.3632	0.1489	59.699	135.899	30.5212
CRC	LB-CRC-42	LB-CRC-42-P-01	m	83	I		R0	yes	before	diagnosis	baseline	Surgery	NA	-1	Adenokarzinom	Sigma	Liver, Lung	NA	Plasma	171	1.25782	5.5	LB_WGS-SP-03	5.86	208832469	20768764	0.65	20839163	3.54	non-smoker	no	NA	NA	NA	NA			NA	NA	NA	NA	NA	NA	NA	NA	NA	NA	NA	NA
CRC	LB-CRC-42	LB-CRC-42-P-02	m	83	I		R0	yes	after	remission	post_surgery_1	Surgery	NA	5	Adenokarzinom	Sigma	Liver, Lung	NA	Plasma	164	29.704	6	LB_WGS-SP-03	8.65	301711478	25780745	1.19	37983116	4.2	non-smoker	no	NA	NA	NA	NA			NA	NA	NA	NA	NA	NA	NA	NA	NA	NA	NA	NA
CRC	LB-CRC-42	LB-CRC-42-P-03	m	83	I		R0	yes	after	remission	post_surgery_1	Surgery	NA	39	Adenokarzinom	Sigma	Liver, Lung	NA	Plasma	174	1.56873	5.5	LB_WGS-SP-03	6.11	228338233	28821977	0.68	22519264	1.83	non-smoker	no	NA	NA	NA	NA			NA	NA	NA	NA	NA	NA	NA	NA	NA	NA	NA	NA
CRC	LB-CRC-42	LB-CRC-42-S-01	m	83	I		R0	no	before			Surgery	NA	-1	Adenokarzinom	Sigma	Liver, Lung	NA	Sputum	NA	NA	NA	LB_WGS-SP-01	1.03	38774357	4943928			NA	non-smoker	no	NA	NA	NA	NA			NA	NA	NA	NA	NA	NA	NA	NA	NA	NA	NA	NA
CRC	LB-CRC-42	LB-CRC-42-T-01	m	83	I		R0	no	NA			Surgery	NA	NA	Adenokarzinom	Sigma	Liver, Lung	NA	FFPE	NA	NA	NA	LB_WGS-SP-01	1.63	59820910	6636054			NA	non-smoker	no	NA	NA	NA	NA			NA	NA	NA	NA	NA	NA	NA	NA	NA	NA	NA	NA
CRC	LB-CRC-43	LB-CRC-43-P-02	f	70	IV	A	NA	yes	during	therapy	pal_chemo	Surgery	Chemo	26	Adenokarzinom	Sigma	Liver, Lung	MSS	Plasma	172	10.17	7	LB_WGS-SP-02	8.07	313519057	54602628	1.58	50743724	1.31	non-smoker	yes	KRAS	c.34G>T; p.Gly12Cys	ATM	c.9023G>A; p.Arg3008His			NA	NA	NA	0.11	0.26	0.41	0.4627	0.2621	0.1089	0.0498758	105.106	0.0474304
CRC	LB-CRC-43	LB-CRC-43-P-03	f	70	IV	A	NA	yes	during	therapy	pal_chemo	Surgery	Chemo	55	Adenokarzinom	Sigma	Liver, Lung	MSS	Plasma	166	56.87	7.5	LB_WGS-SP-02	5.72	225506091	40378697	1.37	43939577	0.96	non-smoker	yes	KRAS	c.34G>T; p.Gly12Cys	ATM	c.9023G>A; p.Arg3008His			NA	NA	NA	0.11	0.26	0.41	0.4627	0.2621	0.1089	0.286676	744.914	0.0384696
CRC	LB-CRC-43	LB-CRC-43-P-05	f	70	IV	A	NA	yes	during	partial_remission	radiation	Surgery	Chemo	110	Adenokarzinom	Sigma	Liver, Lung	MSS	Plasma	169	92.57	5.5	LB_WGS-SP-02	4.95	178575727	18972315	1.15	36964501	0.33	non-smoker	yes	KRAS	c.34G>T; p.Gly12Cys	ATM	c.9023G>A; p.Arg3008His			NA	NA	NA	0.11	0.26	0.41	0.4627	0.2621	0.1089	0.0642424	165.592	0.0387804
CRC	LB-CRC-43	LB-CRC-43-P-06	f	70	IV	A	NA	no	during	partial_remission	post_surgery_2	Surgery	Chemo	160	Adenokarzinom	Sigma	Liver, Lung	MSS	Plasma	171	5.07867	4.5	LB_WGS-SP-03	6.28	221959094	21431376	0.67	21325031	0.94	non-smoker	no	KRAS	c.34G>T; p.Gly12Cys	ATM	c.9023G>A; p.Arg3008His			NA	NA	NA	NA	NA	NA	NA	NA	NA	NA	NA	NA
CRC	LB-CRC-43	LB-CRC-43-P-07	f	70	IV	A	NA	yes	during	partial_remission	post_surgery_2	Surgery	Chemo	201	Adenokarzinom	Sigma	Liver, Lung	MSS	Plasma	171	5.52646	6.5	LB_WGS-SP-03	5.45	192242203	17795046	0.46	14894002	0.9	non-smoker	no	KRAS	c.34G>T; p.Gly12Cys	ATM	c.9023G>A; p.Arg3008His			NA	NA	NA	NA	NA	NA	NA	NA	NA	NA	NA	NA
CRC	LB-CRC-43	LB-CRC-43-P-08	f	70	IV	A	NA		during	progressive_disease	chemo_2	Surgery	Chemo	278	Adenokarzinom	Sigma	Liver, Lung	MSS	Plasma	167	3.96277	6.5	LB_WGS-SP-03	9.84	344538652	30477120	1.45	46223089	0.8	non-smoker	no	KRAS	c.34G>T; p.Gly12Cys	ATM	c.9023G>A; p.Arg3008His			NA	NA	NA	NA	NA	NA	NA	NA	NA	NA	NA	NA
CRC	LB-CRC-43	LB-CRC-43-P-09	f	70	IV	A	NA		during	progressive_disease	chemo_2	Surgery	Chemo	313	Adenokarzinom	Sigma	Liver, Lung	MSS	Plasma	169	6.0176	7.5	LB_WGS-SP-03	5.96	209333192	18934953	0.71	22609838	0.7	non-smoker	no	KRAS	c.34G>T; p.Gly12Cys	ATM	c.9023G>A; p.Arg3008His			NA	NA	NA	NA	NA	NA	NA	NA	NA	NA	NA	NA
CRC	LB-CRC-43	LB-CRC-43-P-10	f	70	IV	A	NA		during	stable_disease	chemo_2	Surgery	Chemo	212	Adenokarzinom	Sigma	Liver, Lung	MSS	Plasma	167	9.3944	7.5	LB_WGS-SP-03	4.74	165950101	14610441	0.63	20158777	0.91	non-smoker	no	KRAS	c.34G>T; p.Gly12Cys	ATM	c.9023G>A; p.Arg3008His			NA	NA	NA	NA	NA	NA	NA	NA	NA	NA	NA	NA
CRC	LB-CRC-43	LB-CRC-43-S-01	f	70	IV	A	NA	yes	before			Surgery	Chemo	0	Adenokarzinom	Sigma	Liver, Lung	MSS	Sputum	NA	NA	NA	LB_WGS-SP-01	0.91	36467620	6686773			NA	non-smoker	no	KRAS	c.34G>T; p.Gly12Cys	ATM	c.9023G>A; p.Arg3008His			NA	NA	NA	NA	NA	NA	NA	NA	NA	NA	NA	NA
CRC	LB-CRC-43	LB-CRC-43-T-01	f	70	IV	A	NA	no	during			Surgery	Chemo	NA	Adenokarzinom	Sigma	Liver, Lung	MSS	FFPE	NA	NA	NA	LB_WGS-SP-01	1.17	49727303	9716826			NA	non-smoker	no	KRAS	c.34G>T; p.Gly12Cys	ATM	c.9023G>A; p.Arg3008His			NA	NA	NA	NA	NA	NA	NA	NA	NA	NA	NA	NA
CRC	LB-CRC-44	LB-CRC-44-P-01	f	78	III	B	R0	yes	before	diagnosis	baseline	Surgery	NA	0	Adenokarzinom	rechte Kolonflexur	NA	NA	Plasma	169	2.368	7.5	LB_WGS-SP-05	5.8	203914712	18658657	0.73	23342132	0.466626	non-smoker	no	NA	NA	NA	NA	NA	NA	NA	NA	NA	NA	NA	NA	NA	NA	NA	NA	NA	NA
CRC	LB-CRC-44	LB-CRC-44-P-02	f	78	III	B	R0	yes	after	remission	post_surgery_1	Surgery	NA	8	Adenokarzinom	rechte Kolonflexur	NA	NA	Plasma	164	9.7196	7.5	LB_WGS-SP-05	5.82	204157925	18362281	0.91	28980310	0.473742	non-smoker	no	NA	NA	NA	NA	NA	NA	NA	NA	NA	NA	NA	NA	NA	NA	NA	NA	NA	NA
CRC	LB-CRC-44	LB-CRC-44-S-01	f	78	III	B	R0	no				Surgery	NA	8	Adenokarzinom	rechte Kolonflexur	NA	NA	Sputum				LB_WGS-SP-06	1.08	41231992	5627683			NA	non-smoker	no	NA	NA	NA	NA	NA	NA	NA	NA	NA	NA	NA	NA	NA	NA	NA	NA	NA	NA
CRC	LB-CRC-44	LB-CRC-44-T-01	f	78	III	B	R0	yes				Surgery	NA	NA	Adenokarzinom	rechte Kolonflexur	NA	NA	FFPE				LB_WGS-SP-06	1.1	39507875	3447900			NA	non-smoker	no	NA	NA	NA	NA	NA	NA	NA	NA	NA	NA	NA	NA	NA	NA	NA	NA	NA	NA
CRC	LB-CRC-45	LB-CRC-45-P-01	m	46	I	NA	NA	yes	during	therapy	baseline	Surgery	Chemo	-5	Adenokarzinom	Rectum	NA	NA	Plasma	171	0.6064	7.5	LB_WGS-SP-05	5.55	194798192	17379249	0.81	25908634	0	non-smoker	no	NA	NA	NA	NA	NA	NA	NA	NA	NA	NA	NA	NA	NA	NA	NA	NA	NA	NA
CRC	LB-CRC-45	LB-CRC-45-P-02	m	46	I	NA	NA	yes	after	remission	post_surgery_1	Surgery	Chemo	6	Adenokarzinom	Rectum	NA	NA	Plasma	167	1.2328	7.5	LB_WGS-SP-05	5.3	185866275	16579553	0.75	23985825	0	non-smoker	no	NA	NA	NA	NA	NA	NA	NA	NA	NA	NA	NA	NA	NA	NA	NA	NA	NA	NA
CRC	LB-CRC-45	LB-CRC-45-S-01	m	46	I	NA	NA	yes				Surgery	Chemo	-5	Adenokarzinom	Rectum	NA	NA	Sputum				LB_WGS-SP-06	0.89	35617027	4918511			NA	non-smoker	no	NA	NA	NA	NA	NA	NA	NA	NA	NA	NA	NA	NA	NA	NA	NA	NA	NA	NA
CRC	LB-CRC-45	LB-CRC-45-T-01	m	46	I	NA	NA	no				Surgery	Chemo	26	Adenokarzinom	Rectum	NA	NA	FFPE	m1A2			LB_WGS-SP-06	0.99	35079420	3245810			NA	non-smoker	no	NA	NA	NA	NA	NA	NA	NA	NA	NA	NA	NA	NA	NA	NA	NA	NA	NA	NA
CRC	LB-CRC-46	LB-CRC-46-P-01	m	78	IV	A	R0 (lokal)	no	during	therapy	baseline	Surgery	Chemo	-1	Adenokarzinom	Colon ascendens	Liver	MSS	Plasma	169	4.18971	3.5	LB_WGS-SP-03	8.63	302256615	26768601	1.28	40960117	0.5	non-smoker	no	KRAS	SNV	NA	NA			NA	NA	NA	NA	NA	NA	NA	NA	NA	NA	NA	NA
CRC	LB-CRC-46	LB-CRC-46-P-02	m	78	IV	A	R0 (lokal)	yes	after	therapy	post_surgery_1	Surgery	Chemo	9	Adenokarzinom	Colon ascendens	Liver	MSS	Plasma	174	58.679	6	LB_WGS-SP-03	5.53	200236572	22334460	0.63	20534632	0.5	non-smoker	no	KRAS	SNV	NA	NA			NA	NA	NA	NA	NA	NA	NA	NA	NA	NA	NA	NA
CRC	LB-CRC-46	LB-CRC-46-P-03	m	78	IV	A	R0 (lokal)	no	after	therapy	post_surgery_1	Surgery	Chemo	35	Adenokarzinom	Colon ascendens	Liver	MSS	Plasma	170	2.312	6	LB_WGS-SP-03	6.54	235853849	25701325	0.87	28084824	0.33	non-smoker	no	KRAS	SNV	NA	NA			NA	NA	NA	NA	NA	NA	NA	NA	NA	NA	NA	NA
CRC	LB-CRC-46	LB-CRC-46-S-01	m	78	IV	A	R0 (lokal)	yes	during			Surgery	Chemo	-1	Adenokarzinom	Colon ascendens	Liver	MSS	Sputum	NA	NA	NA	LB_WGS-SP-01	1.11	43401885	6739979			NA	non-smoker	no	KRAS	SNV	NA	NA			NA	NA	NA	NA	NA	NA	NA	NA	NA	NA	NA	NA
CRC	LB-CRC-46	LB-CRC-46-T-01	m	78	IV	A	R0 (lokal)	yes	after			Surgery	Chemo	NA	Adenokarzinom	Colon ascendens	Liver	MSS	FFPE	NA	NA	NA	LB_WGS-SP-01	1.06	40156847	4425333			NA	non-smoker	no	KRAS	SNV	NA	NA			NA	NA	NA	NA	NA	NA	NA	NA	NA	NA	NA	NA
CRC	LB-CRC-47	LB-CRC-47-P-01	m	74	III		R0	yes	before	diagnosis	baseline	Surgery	Chemo	-7	Adenokarzinom	Sigma	NA	NA	Plasma	166	2.6896	7.5	LB_WGS-SP-03	5.26	186919627	18609294	0.97	30922528	0.19	non-smoker	no	NA	NA	NA	NA			NA	NA	NA	NA	NA	NA	NA	NA	NA	NA	NA	NA
CRC	LB-CRC-47	LB-CRC-47-P-02	m	74	III		R0	no	during	therapy	post_surgery_1	Surgery	Chemo	16	Adenokarzinom	Sigma	NA	NA	Plasma	167	6.5805	4	LB_WGS-SP-03	5.91	209405381	20688932	0.74	23718251	0.38	non-smoker	no	NA	NA	NA	NA			NA	NA	NA	NA	NA	NA	NA	NA	NA	NA	NA	NA
CRC	LB-CRC-47	LB-CRC-47-P-03	m	74	III		R0	yes	during	therapy	chemo_1	Surgery	Chemo	28	Adenokarzinom	Sigma	NA	NA	Plasma	166	4.482	4	LB_WGS-SP-03	7.95	279561432	25922577	1.07	34220863	0.36	non-smoker	no	NA	NA	NA	NA			NA	NA	NA	NA	NA	NA	NA	NA	NA	NA	NA	NA
CRC	LB-CRC-47	LB-CRC-47-P-04	m	74	III		R0	no	during	therapy	chemo_1	Surgery	Chemo	50	Adenokarzinom	Sigma	NA	NA	Plasma	168	2.8288	7.5	LB_WGS-SP-03	10.88	390939090	41824897	1.11	35721975	0.740171	non-smoker	no	NA	NA	NA	NA			NA	NA	NA	NA	NA	NA	NA	NA	NA	NA	NA	NA
CRC	LB-CRC-47	LB-CRC-47-P-05	m	74	III		R0	no	during	therapy	chemo_1	Surgery	Chemo	72	Adenokarzinom	Sigma	NA	NA	Plasma	171	3.513	4	LB_WGS-SP-03	6.98	246425341	23432313	0.69	21957132	0.38757	non-smoker	no	NA	NA	NA	NA			NA	NA	NA	NA	NA	NA	NA	NA	NA	NA	NA	NA
CRC	LB-CRC-47	LB-CRC-47-P-06	m	74	III		R0	no	during	therapy	chemo_1	Surgery	Chemo	83	Adenokarzinom	Sigma	NA	NA	Plasma	172	2.0508	5	LB_WGS-SP-03	7.9	277855457	25505707	1	32029227	1.30028	non-smoker	no	NA	NA	NA	NA			NA	NA	NA	NA	NA	NA	NA	NA	NA	NA	NA	NA
CRC	LB-CRC-47	LB-CRC-47-P-07	m	74	III		R0	yes	during	therapy	chemo_1	Surgery	Chemo	114	Adenokarzinom	Sigma	NA	NA	Plasma	173	2.46686	3.5	LB_WGS-SP-03	5.19	183490048	17311616	0.58	18525920	0.76	non-smoker	no	NA	NA	NA	NA			NA	NA	NA	NA	NA	NA	NA	NA	NA	NA	NA	NA
CRC	LB-CRC-47	LB-CRC-47-P-08	m	74	III		R0		during	therapy	chemo_1	Surgery	Chemo	142	Adenokarzinom	Sigma	NA	NA	Plasma	172	2.9952	5	LB_WGS-SP-03	7.25	254927217	23479577	1	31918466	0.75	non-smoker	no	NA	NA	NA	NA			NA	NA	NA	NA	NA	NA	NA	NA	NA	NA	NA	NA
CRC	LB-CRC-47	LB-CRC-47-P-09	m	74	III		R0		during	therapy	chemo_1	Surgery	Chemo	177	Adenokarzinom	Sigma	NA	NA	Plasma	180	10.224	3.5	LB_WGS-SP-03	5.32	189180105	19269488	0.36	11625676	0.66	non-smoker	no	NA	NA	NA	NA			NA	NA	NA	NA	NA	NA	NA	NA	NA	NA	NA	NA
CRC	LB-CRC-47	LB-CRC-47-P-10	m	74	III		R0		after	remission	post_chemo_1	Surgery	Chemo	226	Adenokarzinom	Sigma	NA	NA	Plasma	173	1.5684	5	LB_WGS-SP-03	6.56	233604399	22969512	0.82	26476407	0.5	non-smoker	no	NA	NA	NA	NA			NA	NA	NA	NA	NA	NA	NA	NA	NA	NA	NA	NA
CRC	LB-CRC-47	LB-CRC-47-S-01	m	74	III		R0	yes	before			Surgery	Chemo	-7	Adenokarzinom	Sigma	NA	NA	Sputum	NA	NA	NA	LB_WGS-SP-01	0.86	33101580	4487246			NA	non-smoker	no	NA	NA	NA	NA			NA	NA	NA	NA	NA	NA	NA	NA	NA	NA	NA	NA
CRC	LB-CRC-47	LB-CRC-47-T-01	m	74	III		R0	no	NA			Surgery	Chemo	NA	Adenokarzinom	Sigma	NA	NA	FFPE	NA	NA	NA	LB_WGS-SP-01	1.47	57247877	7476895			NA	non-smoker	no	NA	NA	NA	NA			NA	NA	NA	NA	NA	NA	NA	NA	NA	NA	NA	NA
CRC	LB-CRC-48	LB-CRC-48-P-01	m	71	IV		R1	yes	before	diagnosis	baseline	Surgery	Chemo	-14	Adenokarzinom	Rectum	Liver, Lung	MSI	Plasma	156	166.843	7.5	LB_WGS-SP-03	9.32	326720839	28779872	2.67	85457646	27.52	non-smoker	no	KRAS	c.35G>T; p.Gly12Val	APC	c.4216C>T; p.Gln1406*			NA	NA	NA	NA	NA	NA	NA	NA	NA	NA	NA	NA
CRC	LB-CRC-48	LB-CRC-48-P-02	m	71	IV		R1	no	during	therapy	pal_chemo	Surgery	Chemo	2	Adenokarzinom	Rectum	Liver, Lung	MSI	Plasma	163	917.68	7.5	LB_WGS-SP-03	7.21	253729114	23194122	2.55	81538422	34.8439	non-smoker	no	KRAS	c.35G>T; p.Gly12Val	APC	c.4216C>T; p.Gln1406*			NA	NA	NA	NA	NA	NA	NA	NA	NA	NA	NA	NA
CRC	LB-CRC-48	LB-CRC-48-P-03	m	71	IV		R1	yes	during	progressive_disease	pal_chemo	Surgery	Chemo	11	Adenokarzinom	Rectum	Liver, Lung	MSI	Plasma	162	442.338	6.5	LB_WGS-SP-03	14.06	498037435	47839226	5.36	171664464	56.5765	non-smoker	no	KRAS	c.35G>T; p.Gly12Val	APC	c.4216C>T; p.Gln1406*			NA	NA	NA	NA	NA	NA	NA	NA	NA	NA	NA	NA
CRC	LB-CRC-48	LB-CRC-48-P-04	m	71	IV		R1	yes	during	progressive_disease	post_chemo_1	Surgery	Chemo	30	Adenokarzinom	Rectum	Liver, Lung	MSI	Plasma	169	360.96	7.5	LB_WGS-SP-03	9.74	343955178	32150224	2.56	81840488	53.9481	non-smoker	no	KRAS	c.35G>T; p.Gly12Val	APC	c.4216C>T; p.Gln1406*			NA	NA	NA	NA	NA	NA	NA	NA	NA	NA	NA	NA
CRC	LB-CRC-48	LB-CRC-48-S-01	m	71	IV		R1	yes	before			Surgery	Chemo	-14	Adenokarzinom	Rectum	Liver, Lung	MSI	Sputum	NA	NA	NA	LB_WGS-SP-03	0.78	29691540	4210057			NA	non-smoker	no	KRAS	c.35G>T; p.Gly12Val	APC	c.4216C>T; p.Gln1406*			NA	NA	NA	NA	NA	NA	NA	NA	NA	NA	NA	NA
CRC	LB-CRC-48	LB-CRC-48-T-01	m	71	IV		R1	no	NA			Surgery	Chemo	NA	Adenokarzinom	Rectum	Liver, Lung	MSI	FFPE	NA	NA	NA	LB_WGS-SP-01	1.34	51859306	6652098			NA	non-smoker	no	KRAS	c.35G>T; p.Gly12Val	APC	c.4216C>T; p.Gln1406*			NA	NA	NA	NA	NA	NA	NA	NA	NA	NA	NA	NA
CRC	LB-CRC-49	LB-CRC-49-P-01	f	78	II	A	R0	no	before	diagnosis	baseline	Surgery	NA	-1	Adenokarzinom	Colon Transversum	NA	MSI-H	Plasma	166	6.31457	3.5	LB_WGS-SP-05	5.48	191482794	16417674	0.94	30028361	NA	non-smoker	no	NRAS	NA	NA	NA	NA	NA	NA	NA	NA	NA	NA	NA	NA	NA	NA	NA	NA	NA
CRC	LB-CRC-49	LB-CRC-49-P-02	f	78	II	A	R0	no	after	remission	post_surgery_1	Surgery	NA	20	Adenokarzinom	Colon Transversum	NA	MSI-H	Plasma	168	3.2108	7.5	LB_WGS-SP-05	6.15	214528920	17930654	0.98	31409000	NA	non-smoker	no	NRAS	NA	NA	NA	NA	NA	NA	NA	NA	NA	NA	NA	NA	NA	NA	NA	NA	NA
CRC	LB-CRC-49	LB-CRC-49-S-01	f	78	II	A	R0	yes				Surgery	NA	-1	Adenokarzinom	Colon Transversum	NA	MSI-H	Sputum				LB_WGS-SP-06	0.62	24028834	2939593			NA	non-smoker	no	NRAS	NA	NA	NA	NA	NA	NA	NA	NA	NA	NA	NA	NA	NA	NA	NA	NA	NA
CRC	LB-CRC-49	LB-CRC-49-T-01	f	78	II	A	R0	yes				Surgery	NA	NA	Adenokarzinom	Colon Transversum	NA	MSI-H	FFPE				LB_WGS-SP-06	0.97	35733129	4195896			NA	non-smoker	no	NRAS	NA	NA	NA	NA	NA	NA	NA	NA	NA	NA	NA	NA	NA	NA	NA	NA	NA
CRC	LB-CRC-50	LB-CRC-50-P-01	f	84	I		R0	yes	before	diagnosis	baseline	Surgery	NA	-1	Adenokarzinom	Colon ascendens	NA	NA	Plasma	171	5.748	3.5	LB_WGS-SP-03	9.14	323109954	30579501	1.27	40670263	0.06	non-smoker	no	NA	NA	NA	NA			NA	NA	NA	NA	NA	NA	NA	NA	NA	NA	NA	NA
CRC	LB-CRC-50	LB-CRC-50-P-02	f	84	I		R0	no	after	remission	post_surgery_1	Surgery	NA	4	Adenokarzinom	Colon ascendens	NA	NA	Plasma	160	36.4128	7.5	LB_WGS-SP-03	5.65	197683156	17216188	1.12	35851567	2.09	non-smoker	no	NA	NA	NA	NA			NA	NA	NA	NA	NA	NA	NA	NA	NA	NA	NA	NA
CRC	LB-CRC-50	LB-CRC-50-S-01	f	84	I		R0	no	before			Surgery	NA	-1	Adenokarzinom	Colon ascendens	NA	NA	Sputum	NA	NA	NA	LB_WGS-SP-03	1	36770146	3842234			NA	non-smoker	no	NA	NA	NA	NA			NA	NA	NA	NA	NA	NA	NA	NA	NA	NA	NA	NA
CRC	LB-CRC-50	LB-CRC-50-T-01	f	84	I		R0		NA			Surgery	NA	NA	Adenokarzinom	Colon ascendens	NA	NA	FFPE	NA	NA	NA	LB_WGS-SP-03	1.3	52404068	8656886			NA	non-smoker	no	NA	NA	NA	NA			NA	NA	NA	NA	NA	NA	NA	NA	NA	NA	NA	NA
CRC	LB-CRC-51	LB-CRC-51-P-01	f	78	II	A	R0	no	before	diagnosis	baseline	Surgery	NA	-3	Adenokarzinom	Sigma	NA	NA	Plasma	168	0.9152	7.5	LB_WGS-SP-03	7.17	258078009	26288135	1.14	37009038	0.27	non-smoker	no	NA	NA	NA	NA			NA	NA	NA	NA	NA	NA	NA	NA	NA	NA	NA	NA
CRC	LB-CRC-51	LB-CRC-51-P-02	f	78	II	A	R0	yes	after	remission	post_surgery_1	Surgery	NA	8	Adenokarzinom	Sigma	NA	NA	Plasma	171	5.59938	7	LB_WGS-SP-03	5.16	180947842	16120143	0.87	27683842	1.89272	non-smoker	no	NA	NA	NA	NA			NA	NA	NA	NA	NA	NA	NA	NA	NA	NA	NA	NA
CRC	LB-CRC-51	LB-CRC-51-P-03	f	78	II	A	R0	no	after	remission	post_surgery_1	Surgery	NA	31	Adenokarzinom	Sigma	NA	NA	Plasma	173	1.30629	7	LB_WGS-SP-03	9.8	347949369	33622282	1.41	45457057	0.46306	non-smoker	no	NA	NA	NA	NA			NA	NA	NA	NA	NA	NA	NA	NA	NA	NA	NA	NA
CRC	LB-CRC-51	LB-CRC-51-P-04	f	78	II	A	R0		after	remission	post_surgery_1	Surgery	NA	177	Adenokarzinom	Sigma	NA	NA	Plasma	170	1.14267	4.5	LB_WGS-SP-03	7.75	280359064	30577431	1.13	36620648	0.62	non-smoker	no	NA	NA	NA	NA			NA	NA	NA	NA	NA	NA	NA	NA	NA	NA	NA	NA
CRC	LB-CRC-51	LB-CRC-51-S-01	f	78	II	A	R0	yes	before			Surgery	NA	-3	Adenokarzinom	Sigma	NA	NA	Sputum	NA	NA	NA	LB_WGS-SP-01	0.81	30237052	3813010			NA	non-smoker	no	NA	NA	NA	NA			NA	NA	NA	NA	NA	NA	NA	NA	NA	NA	NA	NA
CRC	LB-CRC-51	LB-CRC-51-T-01	f	78	II	A	R0		NA			Surgery	NA	NA	Adenokarzinom	Sigma	NA	NA	FFPE	NA	NA	NA	LB_WGS-SP-01	1.48	54417991	5026245			NA	non-smoker	no	NA	NA	NA	NA			NA	NA	NA	NA	NA	NA	NA	NA	NA	NA	NA	NA
CRC	LB-CRC-52	LB-CRC-52-P-01	m	58	III	C	R0 (lokal)	yes	before	diagnosis	baseline	Surgery	Chemo	-1	Adenokarzinom	Coecum	NA	MSS	Plasma	172	1.5344	7.5	LB_WGS-SP-03	8.83	315560226	32000607	1.17	37649342	1.3	non-smoker	no	NA	NA	NA	NA			NA	NA	NA	NA	NA	NA	NA	NA	NA	NA	NA	NA
CRC	LB-CRC-52	LB-CRC-52-P-02	m	58	III	C	R0 (lokal)	yes	during	therapy	post_surgery_1	Surgery	Chemo	6	Adenokarzinom	Coecum	NA	MSS	Plasma	162	75.4145	5.5	LB_WGS-SP-03	5.29	187410575	18304525	0.92	29535315	1.24	non-smoker	no	NA	NA	NA	NA			NA	NA	NA	NA	NA	NA	NA	NA	NA	NA	NA	NA
CRC	LB-CRC-52	LB-CRC-52-P-03	m	58	III	C	R0 (lokal)	yes	during	therapy	post_surgery_1	Surgery	Chemo	34	Adenokarzinom	Coecum	NA	MSS	Plasma	174	2.05754	6.5	LB_WGS-SP-03	7.6	273703085	27946020	1.05	33989076	0.78	non-smoker	no	NA	NA	NA	NA			NA	NA	NA	NA	NA	NA	NA	NA	NA	NA	NA	NA
CRC	LB-CRC-52	LB-CRC-52-P-04	m	58	III	C	R0 (lokal)		during	therapy	chemo_1	Surgery	Chemo	147	Adenokarzinom	Coecum	NA	MSS	Plasma	171	7.49262	7	LB_WGS-SP-03	5.96	212415228	21766909	1	31952387	1.08	non-smoker	no	NA	NA	NA	NA			NA	NA	NA	NA	NA	NA	NA	NA	NA	NA	NA	NA
CRC	LB-CRC-52	LB-CRC-52-P-05	m	58	III	C	R0 (lokal)		during	therapy	chemo_1	Surgery	Chemo	175	Adenokarzinom	Coecum	NA	MSS	Plasma	168	5.511	4	LB_WGS-SP-03	5.84	205405077	19035727	0.86	27637929	0.45	non-smoker	no	NA	NA	NA	NA			NA	NA	NA	NA	NA	NA	NA	NA	NA	NA	NA	NA
CRC	LB-CRC-52	LB-CRC-52-P-06	m	58	III	C	R0 (lokal)		during	therapy	chemo_1	Surgery	Chemo	189	Adenokarzinom	Coecum	NA	MSS	Plasma	178	4.37952	2.5	LB_WGS-SP-03	6.18	217702132	20369565	1.04	33253337	0.323936	non-smoker	no	NA	NA	NA	NA			NA	NA	NA	NA	NA	NA	NA	NA	NA	NA	NA	NA
CRC	LB-CRC-52	LB-CRC-52-S-01	m	58	III	C	R0 (lokal)	no	before			Surgery	Chemo	-1	Adenokarzinom	Coecum	NA	MSS	Sputum	NA	NA	NA	LB_WGS-SP-01	1.14	44194232	6523416			NA	non-smoker	no	NA	NA	NA	NA			NA	NA	NA	NA	NA	NA	NA	NA	NA	NA	NA	NA
CRC	LB-CRC-52	LB-CRC-52-T-01	m	58	III	C	R0 (lokal)		NA			Surgery	Chemo	NA	Adenokarzinom	Coecum	NA	MSS	FFPE	NA	NA	NA	LB_WGS-SP-01	1.46	55127604	6490472			NA	non-smoker	no	NA	NA	NA	NA			NA	NA	NA	NA	NA	NA	NA	NA	NA	NA	NA	NA
CRC	LB-CRC-53	LB-CRC-53-P-01	m	88	III	C	R0	no	during	therapy	baseline	Surgery	NA	0	Adenokarzinom	Rectum	NA	NA	Plasma	169	4.71415	6.5	LB_WGS-SP-05	7.33	258635434	24317774	1.15	36789550	1.09715	non-smoker	no	NA	NA	NA	NA	NA	NA	NA	NA	NA	NA	NA	NA	NA	NA	NA	NA	NA	NA
CRC	LB-CRC-53	LB-CRC-53-P-02	m	88	III	C	R0	no	after	remission	post_surgery_1	Surgery	NA	5	Adenokarzinom	Rectum	NA	NA	Plasma	162	3.9565	6	LB_WGS-SP-05	6.99	248074007	24653240	0.72	22955485	0.108039	non-smoker	no	NA	NA	NA	NA	NA	NA	NA	NA	NA	NA	NA	NA	NA	NA	NA	NA	NA	NA
CRC	LB-CRC-53	LB-CRC-53-S-01	m	88	III	C	R0	yes				Surgery	NA	0	Adenokarzinom	Rectum	NA	NA	Sputum				LB_WGS-SP-06	0.92	35085622	4294178			NA	non-smoker	no	NA	NA	NA	NA	NA	NA	NA	NA	NA	NA	NA	NA	NA	NA	NA	NA	NA	NA
CRC	LB-CRC-53	LB-CRC-53-T-01	m	88	III	C	R0					Surgery	NA	NA	Adenokarzinom	Rectum	NA	NA	FFPE				LB_WGS-SP-06	0.74	33649312	8579946			NA	non-smoker	no	NA	NA	NA	NA	NA	NA	NA	NA	NA	NA	NA	NA	NA	NA	NA	NA	NA	NA
CRC	LB-CRC-54	LB-CRC-54-P-01	f	56	IV	B	NA	yes	before	diagnosis	baseline	NA	Chemo	-5	Adenokarzinom	Rectum	NA	MSS	Plasma	174	5.298	3.5	LB_WGS-SP-05	4.91	172210871	15253557	0.38	12258582	1.9751	non-smoker	no	KRAS	p.G12	NA	NA	NA	NA	NA	NA	NA	NA	NA	NA	NA	NA	NA	NA	NA	NA
CRC	LB-CRC-54	LB-CRC-54-P-02	f	56	IV	B	NA		during	therapy	chemo_1	NA	Chemo	35	Adenokarzinom	Rectum	NA	MSS	Plasma	171	3.9392	7.5	LB_WGS-SP-05	4.7	164202171	14091902	0.48	15395179	2.70197	non-smoker	no	KRAS	p.G12	NA	NA	NA	NA	NA	NA	NA	NA	NA	NA	NA	NA	NA	NA	NA	NA
CRC	LB-CRC-54	LB-CRC-54-S-01	f	56	IV	B	NA	yes				NA	Chemo	-5	Adenokarzinom	Rectum	NA	MSS	Sputum				LB_WGS-SP-06	0.68	26135855	3990892			NA	non-smoker	no	KRAS	p.G12	NA	NA	NA	NA	NA	NA	NA	NA	NA	NA	NA	NA	NA	NA	NA	NA
CRC	LB-CRC-54	LB-CRC-54-T-01	f	56	IV	B	NA					NA	Chemo	NA	Adenokarzinom	Rectum	NA	MSS	FFPE				LB_WGS-SP-06	0.79	29500159	3227480			NA	non-smoker	no	KRAS	p.G12	NA	NA	NA	NA	NA	NA	NA	NA	NA	NA	NA	NA	NA	NA	NA	NA
CRC	LB-CRC-55	LB-CRC-55-P-01	m	73	II	A	R0		before	diagnosis	baseline	Surgery	NA	-3	Adenokarzinom	linke Colonflexur	NA	MSS	Plasma	169	2.7724	7.5	LB_WGS-SP-05	5.12	178764502	15412554	0.52	16487219	0	non-smoker	no	NA	NA	NA	NA	NA	NA	NA	NA	NA	NA	NA	NA	NA	NA	NA	NA	NA	NA
CRC	LB-CRC-55	LB-CRC-55-S-01	m	73	II	A	R0					Surgery	NA	-3	Adenokarzinom	linke Colonflexur	NA	MSS	Sputum				LB_WGS-SP-06	0.66	31242118	8823339			NA	non-smoker	no	NA	NA	NA	NA	NA	NA	NA	NA	NA	NA	NA	NA	NA	NA	NA	NA	NA	NA
CRC	LB-CRC-55	LB-CRC-55-T-01	m	73	II	A	R0					Surgery	NA	NA	Adenokarzinom	linke Colonflexur	NA	MSS	FFPE				LB_WGS-SP-06	1.14	45761681	7531916			NA	non-smoker	no	NA	NA	NA	NA	NA	NA	NA	NA	NA	NA	NA	NA	NA	NA	NA	NA	NA	NA
CRC	LB-CRC-56	LB-CRC-56-P-01	f	58	I		R0		before	diagnosis	baseline	Surgery	NA	-8	Adenokarzinom	Colon ascendens	NA	MSS	Plasma	168	2.0232	7.5	LB_WGS-SP-03	6.53	230347877	21560483	0.77	24806966	1.46	non-smoker	no	NA	NA	NA	NA			NA	NA	NA	NA	NA	NA	NA	NA	NA	NA	NA	NA
CRC	LB-CRC-56	LB-CRC-56-P-02	f	58	I		R0		after	remission	post_surgery_1	Surgery	NA	28	Adenokarzinom	Colon ascendens	NA	MSS	Plasma	167	8.5984	7.5	LB_WGS-SP-03	12.58	448905937	45826194	2.17	69829580	0.76	non-smoker	no	NA	NA	NA	NA			NA	NA	NA	NA	NA	NA	NA	NA	NA	NA	NA	NA
CRC	LB-CRC-56	LB-CRC-56-S-01	f	58	I		R0		before			Surgery	NA	-8	Adenokarzinom	Colon ascendens	NA	MSS	Sputum	NA	NA	NA	LB_WGS-SP-01	1.17	42312808	4418560			NA	non-smoker	no	NA	NA	NA	NA			NA	NA	NA	NA	NA	NA	NA	NA	NA	NA	NA	NA
CRC	LB-CRC-56	LB-CRC-56-T-01	f	58	I		R0		NA			Surgery	NA	NA	Adenokarzinom	Colon ascendens	NA	MSS	FFPE	NA	NA	NA	LB_WGS-SP-01	1.34	51125643	5018597			NA	non-smoker	no	NA	NA	NA	NA			NA	NA	NA	NA	NA	NA	NA	NA	NA	NA	NA	NA
CRC	LB-CRC-57	LB-CRC-57-P-01	m	72	II	A	R0		before	diagnosis	baseline	Surgery	NA	-1	Adenokarzinom	linke Colonflexur	NA	MSS	Plasma	169	5.7465	4	LB_WGS-SP-03	6.77	244215428	25970893	1.25	40496098	1.92	non-smoker	no	NA	NA	NA	NA			NA	NA	NA	NA	NA	NA	NA	NA	NA	NA	NA	NA
CRC	LB-CRC-57	LB-CRC-57-P-02	m	72	II	A	R0		after	remission	post_surgery_1	Surgery	NA	5	Adenokarzinom	linke Colonflexur	NA	MSS	Plasma	164	79.2868	7	LB_WGS-SP-03	12.46	436049209	38481651	2.15	68734789	1.05	non-smoker	no	NA	NA	NA	NA			NA	NA	NA	NA	NA	NA	NA	NA	NA	NA	NA	NA
CRC	LB-CRC-57	LB-CRC-57-P-03	m	72	II	A	R0		after	remission	post_surgery_1	Surgery	NA	32	Adenokarzinom	linke Colonflexur	NA	MSS	Plasma	168	15.8424	7.5	LB_WGS-SP-03	8.49	296498452	25443168	1.58	50612136	0.85	non-smoker	no	NA	NA	NA	NA			NA	NA	NA	NA	NA	NA	NA	NA	NA	NA	NA	NA
CRC	LB-CRC-57	LB-CRC-57-S-01	m	72	II	A	R0		before			Surgery	NA	-1	Adenokarzinom	linke Colonflexur	NA	MSS	Sputum	NA	NA	NA	LB_WGS-SP-01	0.76	32487508	7903481				non-smoker	no	NA	NA	NA	NA			NA	NA	NA	NA	NA	NA	NA	NA	NA	NA	NA	NA
CRC	LB-CRC-57	LB-CRC-57-T-01	m	72	II	A	R0		NA			Surgery	NA	NA	Adenokarzinom	linke Colonflexur	NA	MSS	FFPE	NA	NA	NA	LB_WGS-SP-01	1.57	59537037	6388269			NA	non-smoker	no	NA	NA	NA	NA			NA	NA	NA	NA	NA	NA	NA	NA	NA	NA	NA	NA
CRC	LB-CRC-58	LB-CRC-58-P-01	f	70	IV	B	R0, R1		before	diagnosis	baseline	Surgery	Chemo	-1	Adenokarzinom	Coecum	Liver	MSS	Plasma	164	2.07877	6.5	LB_WGS-SP-03	14.21	496560401	42773982	3.15	100566836	5.89		no	BRAF	p.V600E	NA	NA			NA	NA	NA	NA	NA	NA	NA	NA	NA	NA	NA	NA
CRC	LB-CRC-58	LB-CRC-58-P-02	f	70	IV	B	R0, R1		before	therapy	post_surgery_1	Surgery	Chemo	1	Adenokarzinom	Coecum	Liver	MSS	Plasma	164	15.9655	6.5	LB_WGS-SP-03	12.79	448932891	40063665	3.39	108503653	4.91		no	BRAF	p.V600E	NA	NA			NA	NA	NA	NA	NA	NA	NA	NA	NA	NA	NA	NA
CRC	LB-CRC-58	LB-CRC-58-S-01	f	70	IV	B	R0, R1		before			Surgery	Chemo	-1	Adenokarzinom	Coecum	Liver	MSS	Sputum	NA	NA	NA	LB_WGS-SP-01	1.14	48189117	11027599			NA		no	BRAF	p.V600E	NA	NA			NA	NA	NA	NA	NA	NA	NA	NA	NA	NA	NA	NA
CRC	LB-CRC-58	LB-CRC-58-T-01	f	70	IV	B	R0, R1		before			Surgery	Chemo	NA	Adenokarzinom	Coecum	Liver	MSS	FFPE	NA	NA	NA	LB_WGS-SP-06	8.5	306020277	25813340			NA		no	BRAF	p.V600E	NA	NA			NA	NA	NA	NA	NA	NA	NA	NA	NA	NA	NA	NA
CRC	LB-CRC-59	LB-CRC-59-P-01	f	80	III	B	R0		during	therapy	post_surgery_1	Surgery	Chemo	71	Adenokarzinom	Coecum	NA	NA	Plasma	171	2.7	4.5	LB_WGS-SP-03	12.76	449748820	40501878	1.81	58064713	0.58		no	NA	NA	NA	NA			NA	NA	NA	NA	NA	NA	NA	NA	NA	NA	NA	NA
CRC	LB-CRC-59	LB-CRC-59-P-02	f	80	III	B	R0		during	therapy	chemo_1	Surgery	Chemo	99	Adenokarzinom	Coecum	NA	NA	Plasma	172	8.9224	7.5	LB_WGS-SP-03	16.41	573213208	49263262	2.41	76985032	0.49		no	NA	NA	NA	NA			NA	NA	NA	NA	NA	NA	NA	NA	NA	NA	NA	NA
CRC	LB-CRC-59	LB-CRC-59-P-03	f	80	III	B	R0		during	therapy	chemo_1	Surgery	Chemo	127	Adenokarzinom	Coecum	NA	NA	Plasma	171	5.799	4	LB_WGS-SP-03	7.43	260097782	22875352	1.1	35327879	0.54		no	NA	NA	NA	NA			NA	NA	NA	NA	NA	NA	NA	NA	NA	NA	NA	NA
CRC	LB-CRC-59	LB-CRC-59-P-04	f	80	III	B	R0		during	therapy	chemo_1	Surgery	Chemo	155	Adenokarzinom	Coecum	NA	NA	Plasma	170	4.569	4	LB_WGS-SP-03	14.23	504130100	48482046	1.93	61919681	1.07223		no	NA	NA	NA	NA			NA	NA	NA	NA	NA	NA	NA	NA	NA	NA	NA	NA
CRC	LB-CRC-59	LB-CRC-59-S-01	f	80	III	B	R0		during			Surgery	Chemo	71	Adenokarzinom	Coecum	NA	NA	Sputum	NA	NA	NA	LB_WGS-SP-01	1.25	46054011	5853156			NA		no	NA	NA	NA	NA			NA	NA	NA	NA	NA	NA	NA	NA	NA	NA	NA	NA
CRC	LB-CRC-59	LB-CRC-59-T-01	f	80	III	B	R0		during			Surgery	Chemo	NA	Adenokarzinom	Coecum	NA	NA	FFPE	NA	NA	NA	LB_WGS-SP-03	1.32	50015347	6345263			NA		no	NA	NA	NA	NA			NA	NA	NA	NA	NA	NA	NA	NA	NA	NA	NA	NA
CRC	LB-CRC-60	LB-CRC-60-P-01	m	79	IV	A	R0		before	diagnosis	baseline	Surgery	NA	-1	Karzinom	Coecum	Liver	MSS	Plasma	169	0.988	7.5	LB_WGS-SP-05	5.38	187656525	15910732	0.88	28216887	0.0863268	non-smoker	no	KRAS	p.G13	NA	NA	NA	NA	NA	NA	NA	NA	NA	NA	NA	NA	NA	NA	NA	NA
CRC	LB-CRC-60	LB-CRC-60-P-02	m	79	IV	A	R0		after	remission	post_surgery_1	Surgery	NA	6	Karzinom	Coecum	Liver	MSS	Plasma	164	4.2404	7.5	LB_WGS-SP-05	4.85	169028537	14275794	0.61	19401587	0	non-smoker	no	KRAS	p.G13	NA	NA	NA	NA	NA	NA	NA	NA	NA	NA	NA	NA	NA	NA	NA	NA
CRC	LB-CRC-60	LB-CRC-60-S-01	m	79	IV	A	R0					Surgery	NA	-1	Karzinom	Coecum	Liver	MSS	Sputum				LB_WGS-SP-06	0.89	35283327	6149275			NA	non-smoker	no	KRAS	p.G13	NA	NA	NA	NA	NA	NA	NA	NA	NA	NA	NA	NA	NA	NA	NA	NA
CRC	LB-CRC-60	LB-CRC-60-T-01	m	79	IV	A	R0					Surgery	NA	NA	Karzinom	Coecum	Liver	MSS	FFPE				LB_WGS-SP-06	1.26	46003754	4743611			NA	non-smoker	no	KRAS	p.G13	NA	NA	NA	NA	NA	NA	NA	NA	NA	NA	NA	NA	NA	NA	NA	NA
CRC	LB-CRC-61	LB-CRC-61-P-01	m	56	IV	NA	NA		before	diagnosis	baseline	NA	Chemo	-6	Adenokarzinom	Sigma	Liver, Lung	MSS	Plasma	159	96.1728	2.5	LB_WGS-SP-05	4.87	172064066	16318221	1.34	42681477	9.46784	non-smoker	no	KRAS	c.436G>A; p.A146T	NA	NA	NA	NA	NA	NA	NA	NA	NA	NA	NA	NA	NA	NA	NA	NA
CRC	LB-CRC-61	LB-CRC-61-P-02	m	56	IV	NA	NA		during	therapy	chemo_1	NA	Chemo	42	Adenokarzinom	Sigma	Liver, Lung	MSS	Plasma	171	3.22892	6.5	LB_WGS-SP-05	4.6	161306439	14270898	0.49	15788205	NA	non-smoker	no	KRAS	c.436G>A; p.A146T	NA	NA	NA	NA	NA	NA	NA	NA	NA	NA	NA	NA	NA	NA	NA	NA
CRC	LB-CRC-61	LB-CRC-61-T-01	m	56	IV	NA	NA					NA	Chemo	NA	Adenokarzinom	Sigma	Liver, Lung	MSS	FFPE				LB_WGS-SP-06	1.36	49350688	5013744			NA	non-smoker	no	KRAS	c.436G>A; p.A146T	NA	NA	NA	NA	NA	NA	NA	NA	NA	NA	NA	NA	NA	NA	NA	NA
CRC	LB-CRC-62	LB-CRC-62-P-01	m	62	III	B	R0		before	diagnosis	baseline	Surgery	Chemo	-1	Adenokarzinom	NA	NA	MSS	Plasma	170	6.594	3.5	LB_WGS-SP-05	4.79	168508801	15462517	0.5	15963541	0.477554	non-smoker	no	BRAF	p.V600	NA	NA	NA	NA	NA	NA	NA	NA	NA	NA	NA	NA	NA	NA	NA	NA
CRC	LB-CRC-62	LB-CRC-62-P-02	m	62	III	B	R0		during	therapy	post_surgery_1	Surgery	Chemo	8	Adenokarzinom	NA	NA	MSS	Plasma	164	2.0022	5	LB_WGS-SP-05	4.39	155082675	14745626	0.39	12630175	0.164329	non-smoker	no	BRAF	p.V600	NA	NA	NA	NA	NA	NA	NA	NA	NA	NA	NA	NA	NA	NA	NA	NA
CRC	LB-CRC-62	LB-CRC-62-S-01	m	62	III	B	R0					Surgery	Chemo	-1	Adenokarzinom	NA	NA	MSS	Sputum				LB_WGS-SP-06	0.87	33258642	4650296			NA	non-smoker	no	BRAF	p.V600	NA	NA	NA	NA	NA	NA	NA	NA	NA	NA	NA	NA	NA	NA	NA	NA
CRC	LB-CRC-62	LB-CRC-62-T-01	m	62	III	B	R0					Surgery	Chemo		Adenokarzinom	NA	NA	MSS	FFPE				LB_WGS-SP-06	1.5	54127008	5175462			NA	non-smoker	no	BRAF	p.V600	NA	NA	NA	NA	NA	NA	NA	NA	NA	NA	NA	NA	NA	NA	NA	NA
CRC	LB-CRC-63	LB-CRC-63-P-01	f	50	II	A	R0		before	diagnosis	baseline	Surgery	NA	-1	Adenokarzinom	Colon descendens	NA	MSS	Plasma	171	1.6668	5	LB_WGS-SP-05	5.63	196089148	16437624	0.92	29350067	32.2364	non-smoker	no	NA	NA	NA	NA	NA	NA	NA	NA	NA	NA	NA	NA	NA	NA	NA	NA	NA	NA
CRC	LB-CRC-63	LB-CRC-63-P-02	f	50	II	A	R0		after	remission	post_surgery_1	Surgery	NA	6	Adenokarzinom	Colon descendens	NA	MSS	Plasma	170	2.01133	4.5	LB_WGS-SP-05	4.14	144631124	12491895	0.57	18285668	12.9038	non-smoker	no	NA	NA	NA	NA	NA	NA	NA	NA	NA	NA	NA	NA	NA	NA	NA	NA	NA	NA
CRC	LB-CRC-63	LB-CRC-63-S-01	f	50	II	A	R0		NA	NA	NA	Surgery	NA	-1	Adenokarzinom	Colon descendens	NA	MSS	Sputum				LB_WGS-SP-06	0.98	39336672	7251908			NA	non-smoker	no	NA	NA	NA	NA	NA	NA	NA	NA	NA	NA	NA	NA	NA	NA	NA	NA	NA	NA
CRC	LB-CRC-63	LB-CRC-63-T-01	f	50	II	A	R0		NA	NA	NA	Surgery	NA	NA	Adenokarzinom	Colon descendens	NA	MSS	FFPE				LB_WGS-SP-06	1.09	39701584	3660681			NA	non-smoker	no	NA	NA	NA	NA	NA	NA	NA	NA	NA	NA	NA	NA	NA	NA	NA	NA	NA	NA
CRC	LB-CRC-64	LB-CRC-64-P-01	m	79	II	A	R0		before	diagnosis	baseline	Surgery	NA	-1	Karzinom	Rectum	NA	NA	Plasma	156	27.7248	2.5	LB_WGS-SP-05	4.71	165407790	14965388	0.53	16931470	0	non-smoker	no	NA	NA	NA	NA	NA	NA	NA	NA	NA	NA	NA	NA	NA	NA	NA	NA	NA	NA
CRC	LB-CRC-64	LB-CRC-64-P-02	m	79	II	A	R0		after	remission	post_surgery_1	Surgery	NA	6	Karzinom	Rectum	NA	NA	Plasma	330	21.302	7.5	LB_WGS-SP-05	4.78	167416715	14705748	0.76	24208241	NA	non-smoker	no	NA	NA	NA	NA	NA	NA	NA	NA	NA	NA	NA	NA	NA	NA	NA	NA	NA	NA
CRC	LB-CRC-64	LB-CRC-64-T-01	m	79	II	A	R0					Surgery	NA	NA	Karzinom	Rectum	NA	NA	FFPE				LB_WGS-SP-06	1.64	60310346	6154726			NA	non-smoker	no	NA	NA	NA	NA	NA	NA	NA	NA	NA	NA	NA	NA	NA	NA	NA	NA	NA	NA
CRC	LB-CRC-65	LB-CRC-65-P-01	f	69	II	A	R0		before	diagnosis	baseline	Surgery	NA	-1	Adenokarzinom	Colon descendens	NA	NA	Plasma	163	11.3928	2.5	LB_WGS-SP-05	4.18	145830210	12329116	0.51	16270233	0.021398	non-smoker	no	NA	NA	NA	NA	NA	NA	NA	NA	NA	NA	NA	NA	NA	NA	NA	NA	NA	NA
CRC	LB-CRC-65	LB-CRC-65-P-02	f	69	II	A	R0		after	remission	post_surgery_1	Surgery	NA	12	Adenokarzinom	Colon descendens	NA	NA	Plasma	161	7.60586	7	LB_WGS-SP-05	4.67	164687403	15425247	1	31893120	NA	non-smoker	no	NA	NA	NA	NA	NA	NA	NA	NA	NA	NA	NA	NA	NA	NA	NA	NA	NA	NA
CRC	LB-CRC-65	LB-CRC-65-S-01	f	69	II	A	R0		NA	NA	NA	Surgery	NA	-1	Adenokarzinom	Colon descendens	NA	NA	Sputum				LB_WGS-SP-06	0.7	30304707	6598068			NA	non-smoker	no	NA	NA	NA	NA	NA	NA	NA	NA	NA	NA	NA	NA	NA	NA	NA	NA	NA	NA
CRC	LB-CRC-65	LB-CRC-65-T-01	f	69	II	A	R0		NA	NA	NA	Surgery	NA	NA	Adenokarzinom	Colon descendens	NA	NA	FFPE				LB_WGS-SP-06	0.91	33013903	3336905			NA	non-smoker	no	NA	NA	NA	NA	NA	NA	NA	NA	NA	NA	NA	NA	NA	NA	NA	NA	NA	NA
CRC	LB-CRC-66	LB-CRC-66-P-01	m	61	IV	NA	NA		before	diagnosis	baseline	NA	Chemo	0	Adenokarzinom	Rectum	Liver	MSI-L	Plasma	162	7.827	6	LB_WGS-SP-05	5.65	198362961	17914543	1.31	41971024	>25	smoker	no	KRAS	c.35G>T; p.Gly12Val	TP53	c.818G>A; p.Arg273His	EGFR	c.332T>C; p.Met111Thr	NA	NA	NA	NA	NA	NA	NA	NA	NA	NA	NA	NA
CRC	LB-CRC-66	LB-CRC-66-T-01	m	61	IV							NA	Chemo	NA	Adenokarzinom	Rectum	Liver	MSI-L	FFPE				LB_WGS-SP-06	0.78	29197929	3316129			NA	smoker	no	KRAS	c.35G>T; p.Gly12Val	TP53	c.818G>A; p.Arg273His	EGFR	c.332T>C; p.Met111Thr	NA	NA	NA	NA	NA	NA	NA	NA	NA	NA	NA	NA
CRC	LB-CRC-67	LB-CRC-67-P-01	m	81	II	B	R0		before	diagnosis	baseline	Surgery	NA	0	Adenokarzinom	Rectum		MSS	Plasma	170	3.66525	4	LB_WGS-SP-05	5.81	203961320	18543715	0.61	19486418	0	smoker	no	NA	NA	NA	NA	NA	NA	NA	NA	NA	NA	NA	NA	NA	NA	NA	NA	NA	NA
CRC	LB-CRC-67	LB-CRC-67-P-02	m	81	II	B	R0		after	remission	post_surgery_1	Surgery	NA	6	Adenokarzinom	Rectum		MSS	Plasma	168	55.7797	4	LB_WGS-SP-05	6.09	213920361	19525098	0.73	23473939	0.0788088	smoker	no	NA	NA	NA	NA	NA	NA	NA	NA	NA	NA	NA	NA	NA	NA	NA	NA	NA	NA
CRC	LB-CRC-67	LB-CRC-67-S-01	m	81	II	B	R0					Surgery	NA	0	Adenokarzinom	Rectum		MSS	Sputum				LB_WGS-SP-06	0.75	31119612	6211215			NA	smoker	no	NA	NA	NA	NA	NA	NA	NA	NA	NA	NA	NA	NA	NA	NA	NA	NA	NA	NA
CRC	LB-CRC-67	LB-CRC-67-T-01	m	81	II	B	R0					Surgery	NA	NA	Adenokarzinom	Rectum		MSS	FFPE				LB_WGS-SP-06	1.08	40747165	4723234			NA	smoker	no	NA	NA	NA	NA	NA	NA	NA	NA	NA	NA	NA	NA	NA	NA	NA	NA	NA	NA
CRC	LB-CRC-68	LB-CRC-68-P-01	m	79	II	A	R0		before	diagnosis	baseline	Surgery	NA	-1	Adenokarzinom	Colon ascendens		MSS	Plasma	168	5.8395	4	LB_WGS-SP-05	6.34	222368074	19753920	0.79	25184239	0	smoker	no	NA	NA	NA	NA	NA	NA	NA	NA	NA	NA	NA	NA	NA	NA	NA	NA	NA	NA
CRC	LB-CRC-68	LB-CRC-68-P-02	m	79	II	A	R0		after	remission	post_surgery_1	Surgery	NA	7	Adenokarzinom	Colon ascendens		MSS	Plasma	163	6.7948	7.5	LB_WGS-SP-05	5.73	200617060	17626312	0.88	28234755	0	smoker	no	NA	NA	NA	NA	NA	NA	NA	NA	NA	NA	NA	NA	NA	NA	NA	NA	NA	NA
CRC	LB-CRC-68	LB-CRC-68-S-01	m	79	II	A	R0					Surgery	NA	-1	Adenokarzinom	Colon ascendens		MSS	Sputum				LB_WGS-SP-06	0.75	28133941	3257912			NA	smoker	no	NA	NA	NA	NA	NA	NA	NA	NA	NA	NA	NA	NA	NA	NA	NA	NA	NA	NA
CRC	LB-CRC-68	LB-CRC-68-T-01	m	79	II	A	R0					Surgery	NA	NA	Adenokarzinom	Colon ascendens		MSS	FFPE				LB_WGS-SP-06	0.82	29356422	2522202			NA	smoker	no	NA	NA	NA	NA	NA	NA	NA	NA	NA	NA	NA	NA	NA	NA	NA	NA	NA	NA
CRC	LB-CRC-69	LB-CRC-69-P-01	w	73	IV	NA	NA		before	diagnosis	baseline	NA	Chemo	0	Adenokarzinom	Rectum	Lung	MSS	Plasma	170	4.5894	5	LB_WGS-SP-05	5.97	209325411	18516864	1.02	32796054	4.85509	non-smoker	no	APC	c.4099C>T; p.Glb1367*	TP53	c.584T>C; p.Ile165Thr	NA	NA	NA	NA	NA	NA	NA	NA	NA	NA	NA	NA	NA	NA
CRC	LB-CRC-69	LB-CRC-69-T-01	w	73	IV	NA	NA					NA	Chemo	NA	Adenokarzinom	Rectum	Lung	MSS	FFPE				LB_WGS-SP-06	1.11	49406779	11217259			NA	non-smoker	no	APC	c.4099C>T; p.Glb1367*	TP53	c.584T>C; p.Ile165Thr	NA	NA	NA	NA	NA	NA	NA	NA	NA	NA	NA	NA	NA	NA
CRC	LB-CRC-70	LB-CRC-70-P-01	w	71	III	A	NA		before	diagnosis	baseline	NA	Chemo	-3	Adenokarzinom	Anus	NA	NA	Plasma	169	2.68757	7	LB_WGS-SP-05	4.9	170667089	14352714	0.51	16325991	0	smoker	no	NA	NA	NA	NA	NA	NA	NA	NA	NA	NA	NA	NA	NA	NA	NA	NA	NA	NA
CRC	LB-CRC-70	LB-CRC-70-T-01	w	71	III	A	NA					NA	Chemo	NA	Adenokarzinom	Anus	NA	NA	FFPE				LB_WGS-SP-06	1.38	52323177	6462663			NA	smoker	no	NA	NA	NA	NA	NA	NA	NA	NA	NA	NA	NA	NA	NA	NA	NA	NA	NA	NA
Healthy	LB-Neg-03	LB-Neg-03-P-01	m	52	NA	NA	NA	NA	NA	NA	NA	NA	NA	NA	NA	NA	NA	NA	Plasma	175	1.89	6.5	LB_WGS-SP-02	6.11	218282252	22935673	0.27	8522867	0.8		no	NA	NA	NA	NA			NA	NA	NA	NA	NA	NA	NA	NA	NA	NA	NA	NA
Healthy	LB-Neg-04	LB-Neg-04-P-01	f	69	NA	NA	NA	NA	NA	NA	NA	NA	NA	NA	NA	NA	NA	NA	Plasma	168	5.26	7.5	LB_WGS-SP-02	5.64	202665813	22465212	0.4	12831890	0.89		no	NA	NA	NA	NA			NA	NA	NA	NA	NA	NA	NA	NA	NA	NA	NA	NA
Healthy	LB-Neg-05	LB-Neg-05-P-01	m	30	NA	NA	NA	NA	NA	NA	NA	NA	NA	NA	NA	NA	NA	NA	Plasma	175	4.92	6.5	LB_WGS-SP-02	8.35	300807703	33248789	0.69	22195500	0.95		no	NA	NA	NA	NA			NA	NA	NA	NA	NA	NA	NA	NA	NA	NA	NA	NA
Healthy	LB-Neg-08	LB-Neg-08-P-01	f	24	NA	NA	NA	NA	NA	NA	NA	NA	NA	NA	NA	NA	NA	NA	Plasma	175	1.45	7.5	LB_WGS-SP-02	6.01	216272034	23492782	0.65	20845370	0.87		no	NA	NA	NA	NA			NA	NA	NA	NA	NA	NA	NA	NA	NA	NA	NA	NA
Healthy	LB-Neg-09	LB-Neg-09-P-01	f	31	NA	NA	NA	NA	NA	NA	NA	NA	NA	NA	NA	NA	NA	NA	Plasma	175	1.49	7.5	LB_WGS-SP-02	7.65	275982493	31262831	0.72	23075319	0.6		no	NA	NA	NA	NA			NA	NA	NA	NA	NA	NA	NA	NA	NA	NA	NA	NA
Healthy	LB-Neg-10	LB-Neg-10-P-01	f	29	NA	NA	NA	NA	NA	NA	NA	NA	NA	NA	NA	NA	NA	NA	Plasma	173	2.44	7.5	LB_WGS-SP-02	8.05	290493869	32398859	0.83	26625148	0.74		no	NA	NA	NA	NA			NA	NA	NA	NA	NA	NA	NA	NA	NA	NA	NA	NA
Healthy	LB-Neg-11	LB-Neg-11-P-01	f	51	NA	NA	NA	NA	NA	NA	NA	NA	NA	NA	NA	NA	NA	NA	Plasma	172	1.17	7.5	LB_WGS-SP-02	5.22	189151179	21832262	0.39	12710583	1.01		no	NA	NA	NA	NA			NA	NA	NA	NA	NA	NA	NA	NA	NA	NA	NA	NA
Healthy	LB-Neg-12	LB-Neg-12-P-01	f	55	NA	NA	NA	NA	NA	NA	NA	NA	NA	NA	NA	NA	NA	NA	Plasma	169	0.84	7.5	LB_WGS-SP-02	6.72	241841220	27056149	0.53	17075209	0.81		no	NA	NA	NA	NA			NA	NA	NA	NA	NA	NA	NA	NA	NA	NA	NA	NA
Healthy	LB-Neg-14	LB-Neg-14-P-01	f	50	NA	NA	NA	NA	NA	NA	NA	NA	NA	NA	NA	NA	NA	NA	Plasma	172	1.52	7.5	LB_WGS-SP-02	6.92	246803828	25734903	0.48	15495171	0.95		no	NA	NA	NA	NA			NA	NA	NA	NA	NA	NA	NA	NA	NA	NA	NA	NA
Healthy	LB-Neg-15	LB-Neg-15-P-01	f	32	NA	NA	NA	NA	NA	NA	NA	NA	NA	NA	NA	NA	NA	NA	Plasma	180	2.31	7.5	LB_WGS-SP-02	7.01	257135404	32388699	0.58	18674806	0.44		no	NA	NA	NA	NA			NA	NA	NA	NA	NA	NA	NA	NA	NA	NA	NA	NA
Healthy	LB-Neg-16	LB-Neg-16-P-01	m	39	NA	NA	NA	NA	NA	NA	NA	NA	NA	NA	NA	NA	NA	NA	Plasma	169	0.91	6	LB_WGS-SP-02	5.94	220908958	30863374	0.74	23561880	1.16		no	NA	NA	NA	NA			NA	NA	NA	NA	NA	NA	NA	NA	NA	NA	NA	NA
Healthy	LB-Neg-17	LB-Neg-17-P-01	m	24	NA	NA	NA	NA	NA	NA	NA	NA	NA	NA	NA	NA	NA	NA	Plasma	173	8.71	6.5	LB_WGS-SP-02	5.56	225190452	46604331	0.65	20825631	1.02		no	NA	NA	NA	NA			NA	NA	NA	NA	NA	NA	NA	NA	NA	NA	NA	NA
Healthy	LB-Neg-18	LB-Neg-18-P-01	f	25	NA	NA	NA	NA	NA	NA	NA	NA	NA	NA	NA	NA	NA	NA	Plasma	176	2.07	7.5	LB_WGS-SP-02	10.8	415997172	67265891	1.37	44121594	0.58		no	NA	NA	NA	NA			NA	NA	NA	NA	NA	NA	NA	NA	NA	NA	NA	NA
Healthy	LB-Neg-19	LB-Neg-19-P-01	f	42	NA	NA	NA	NA	NA	NA	NA	NA	NA	NA	NA	NA	NA	NA	Plasma	173	2.53	7.5	LB_WGS-SP-02	5.58	195586419	17441264	0.78	24842970	0.88		no	NA	NA	NA	NA			NA	NA	NA	NA	NA	NA	NA	NA	NA	NA	NA	NA
Healthy	LB-Neg-20	LB-Neg-20-P-01	m	46	NA	NA	NA	NA	NA	NA	NA	NA	NA	NA	NA	NA	NA	NA	Plasma	178	3.03	6.5	LB_WGS-SP-02	6.06	221453847	27214584	0.31	10085359	0.97		no	NA	NA	NA	NA			NA	NA	NA	NA	NA	NA	NA	NA	NA	NA	NA	NA
Healthy	LB-Neg-21	LB-Neg-21-P-01	f	21	NA	NA	NA	NA	NA	NA	NA	NA	NA	NA	NA	NA	NA	NA	Plasma	169	2.37	7.5	LB_WGS-SP-02	6.93	246827209	24836175	0.68	21851682	0.67		no	NA	NA	NA	NA			NA	NA	NA	NA	NA	NA	NA	NA	NA	NA	NA	NA
Healthy	LB-Neg-23	LB-Neg-23-P-01	m	48	NA	NA	NA	NA	NA	NA	NA	NA	NA	NA	NA	NA	NA	NA	Plasma	175	3.32	7.5	LB_WGS-SP-02	5.86	212909439	25641511	0.41	13061564	1.34		no	NA	NA	NA	NA			NA	NA	NA	NA	NA	NA	NA	NA	NA	NA	NA	NA
Healthy	LB-Neg-28	LB-Neg-28-P-01	f	54	NA	NA	NA	NA	NA	NA	NA	NA	NA	NA	NA	NA	NA	NA	Plasma	172	3.67	7.5	LB_WGS-SP-02	4.73	165347530	14547301	0.43	13646801	0.95		no	NA	NA	NA	NA			NA	NA	NA	NA	NA	NA	NA	NA	NA	NA	NA	NA
Healthy	LB-Neg-31	LB-Neg-31-P-01	m	32	NA	NA	NA	yes	NA	NA	NA	NA	NA	NA	NA	NA	NA	NA	Plasma	174	0.66	6.5	LB_WGS-SP-02	7.5	293923324	49296077	0.87	28490322	0.754164		no	NA	NA	NA	NA			NA	NA	NA	NA	NA	NA	NA	NA	NA	NA	NA	NA
Healthy	LB-Neg-34	LB-Neg-34-P-01	f	23	NA	NA	NA	NA	NA	NA	NA	NA	NA	NA	NA	NA	NA	NA	Plasma	172	1.91	7.5	LB_WGS-SP-02	7.85	294140222	41956813	1.33	42654190	0.38		no	NA	NA	NA	NA			NA	NA	NA	NA	NA	NA	NA	NA	NA	NA	NA	NA
Healthy	LB-Neg-37	LB-Neg-37-P-01	m	60	NA	NA	NA	NA	NA	NA	NA	NA	NA	NA	NA	NA	NA	NA	Plasma	180	4.55	7.5	LB_WGS-SP-02	6.01	219214033	27045746	0.33	10526806	0.92		no	NA	NA	NA	NA			NA	NA	NA	NA	NA	NA	NA	NA	NA	NA	NA	NA
Healthy	LB-Neg-38	LB-Neg-38-P-01	m	20	NA	NA	NA	NA	NA	NA	NA	NA	NA	NA	NA	NA	NA	NA	Plasma	168	1.75	7.5	LB_WGS-SP-02	5.82	228508639	41465550	0.93	29748785	0.92		no	NA	NA	NA	NA			NA	NA	NA	NA	NA	NA	NA	NA	NA	NA	NA	NA
Healthy	LB-Neg-39	LB-Neg-39-P-01	m	30	NA	NA	NA	NA	NA	NA	NA	NA	NA	NA	NA	NA	NA	NA	Plasma	176	12.6	7	LB_WGS-SP-02	5.78	204439048	19753616	0.32	10387696	0.66		no	NA	NA	NA	NA			NA	NA	NA	NA	NA	NA	NA	NA	NA	NA	NA	NA
Healthy	LB-Neg-40	LB-Neg-40-P-01	f	49	NA	NA	NA	NA	NA	NA	NA	NA	NA	NA	NA	NA	NA	NA	Plasma	171	2.55	7.5	LB_WGS-SP-02	4.9	173525088	16661155	0.65	20731709	0.84		no	NA	NA	NA	NA			NA	NA	NA	NA	NA	NA	NA	NA	NA	NA	NA	NA
Healthy	LB-Neg-41	LB-Neg-41-P-01	f	31	NA	NA	NA	yes	NA	NA	NA	NA	NA	NA	NA	NA	NA	NA	Plasma	177	3.42	7.5	LB_WGS-SP-02	6.08	225269608	30564383	0.53	17091548	0.76529		no	NA	NA	NA	NA			NA	NA	NA	NA	NA	NA	NA	NA	NA	NA	NA	NA
Healthy	LB-Neg-45	LB-Neg-45-P-01	m	26	NA	NA	NA	NA	NA	NA	NA	NA	NA	NA	NA	NA	NA	NA	Plasma	168	2.3	7	LB_WGS-SP-02	5.64	222528425	38750263	0.91	29413978	0.47		no	NA	NA	NA	NA			NA	NA	NA	NA	NA	NA	NA	NA	NA	NA	NA	NA
Healthy	LB-Neg-46	LB-Neg-46-P-01	m	24	NA	NA	NA	NA	NA	NA	NA	NA	NA	NA	NA	NA	NA	NA	Plasma	176	2.76	6	LB_WGS-SP-02	5.4	208291615	34239257	0.97	31075862	0.61		no	NA	NA	NA	NA			NA	NA	NA	NA	NA	NA	NA	NA	NA	NA	NA	NA
Healthy	LB-Neg-47	LB-Neg-47-P-01	m	46	NA	NA	NA	NA	NA	NA	NA	NA	NA	NA	NA	NA	NA	NA	Plasma	171	3.15	7.5	LB_WGS-SP-02	6.97	244660635	22358122	0.64	20530641	0.72		no	NA	NA	NA	NA			NA	NA	NA	NA	NA	NA	NA	NA	NA	NA	NA	NA
Healthy	LB-Neg-48	LB-Neg-48-P-01	m	41	NA	NA	NA	NA	NA	NA	NA	NA	NA	NA	NA	NA	NA	NA	Plasma	170	5.64	7.5	LB_WGS-SP-02	5.67	199252569	18300500	0.67	21478028	0.81		no	NA	NA	NA	NA			NA	NA	NA	NA	NA	NA	NA	NA	NA	NA	NA	NA
Healthy	LB-Neg-50	LB-Neg-50-P-01	m	26	NA	NA	NA	NA	NA	NA	NA	NA	NA	NA	NA	NA	NA	NA	Plasma	176	1.99	3.5	LB_WGS-SP-02	5.88	241591883	52023119	0.76	24535146	0.39		no	NA	NA	NA	NA			NA	NA	NA	NA	NA	NA	NA	NA	NA	NA	NA	NA
Healthy	LB-Neg-51	LB-Neg-51-P-01	f	27	NA	NA	NA	NA	NA	NA	NA	NA	NA	NA	NA	NA	NA	NA	Plasma	172	2.59	7.5	LB_WGS-SP-02	6.65	248601116	33908767	1.51	48306028	0.41		no	NA	NA	NA	NA			NA	NA	NA	NA	NA	NA	NA	NA	NA	NA	NA	NA
Healthy	LB-Neg-52	LB-Neg-52-P-01	m	31	NA	NA	NA	NA	NA	NA	NA	NA	NA	NA	NA	NA	NA	NA	Plasma	175	2.64	6	LB_WGS-SP-02	9.6	380726265	70887149	0.97	31403946	0.37		no	NA	NA	NA	NA			NA	NA	NA	NA	NA	NA	NA	NA	NA	NA	NA	NA
Healthy	LB-Neg-53	LB-Neg-53-P-01	f	25	NA	NA	NA	NA	NA	NA	NA	NA	NA	NA	NA	NA	NA	NA	Plasma	171	2.76	7.5	LB_WGS-SP-02	6.99	262149976	37737826	0.86	27519891	0.34		no	NA	NA	NA	NA			NA	NA	NA	NA	NA	NA	NA	NA	NA	NA	NA	NA
Healthy	LB-Neg-54	LB-Neg-54-P-01	m	31	NA	NA	NA	yes	NA	NA	NA	NA	NA	NA	NA	NA	NA	NA	Plasma	171	3.09	7	LB_WGS-SP-02	8.72	333960978	54177822	1.22	39245554	0.51		no	NA	NA	NA	NA			NA	NA	NA	NA	NA	NA	NA	NA	NA	NA	NA	NA
Healthy	LB-Neg-55	LB-Neg-55-P-01	m	46	NA	NA	NA		NA	NA	NA	NA	NA	NA	NA	NA	NA	NA	Plasma	164	1.7816	7.5	LB_WGS-SP-07	10.51	367187082	31825677	1.64	52406616	NA	NA	no	NA	NA	NA	NA	NA	NA	NA	NA	NA	NA	NA	NA	NA	NA	NA	NA	NA	NA
Healthy	LB-Neg-56	LB-Neg-56-P-01	f	43	NA	NA	NA	yes	NA	NA	NA	NA	NA	NA	NA	NA	NA	NA	Plasma	174	2.8	7.5	LB_WGS-SP-02	3.44	126371096	16339532	0.48	15435249	1.60606		no	NA	NA	NA	NA			NA	NA	NA	NA	NA	NA	NA	NA	NA	NA	NA	NA
Healthy	LB-Neg-58	LB-Neg-58-P-01	f	28	NA	NA	NA	no	NA	NA	NA	NA	NA	NA	NA	NA	NA	NA	Plasma	177	0.98	7.5	LB_WGS-SP-02	4.61	192278185	41640080	0.5	16629950	0.328554		no	NA	NA	NA	NA			NA	NA	NA	NA	NA	NA	NA	NA	NA	NA	NA	NA
Healthy	LB-Neg-59	LB-Neg-59-P-01	f	24	NA	NA	NA	yes	NA	NA	NA	NA	NA	NA	NA	NA	NA	NA	Plasma	171	3.07	7.5	LB_WGS-SP-02	6.95	253264592	30449321	0.61	19652287	0.231674		no	NA	NA	NA	NA			NA	NA	NA	NA	NA	NA	NA	NA	NA	NA	NA	NA
Healthy	LB-Neg-60	LB-Neg-60-P-01	f	30	NA	NA	NA	yes	NA	NA	NA	NA	NA	NA	NA	NA	NA	NA	Plasma	178	1.25	7.5	LB_WGS-SP-02	5.18	209395327	42597725	0.59	19138730	0.13572		no	NA	NA	NA	NA			NA	NA	NA	NA	NA	NA	NA	NA	NA	NA	NA	NA
Healthy	LB-Neg-61	LB-Neg-61-P-01	m	37	NA	NA	NA	yes	NA	NA	NA	NA	NA	NA	NA	NA	NA	NA	Plasma	171	2.12	7.5	LB_WGS-SP-02	4.2	149707455	15371414	0.66	21225099	1.06		no	NA	NA	NA	NA			NA	NA	NA	NA	NA	NA	NA	NA	NA	NA	NA	NA
Healthy	LB-Neg-62	LB-Neg-62-P-01	m	33	NA	NA	NA	yes	NA	NA	NA	NA	NA	NA	NA	NA	NA	NA	Plasma	172	5.17	7.5	LB_WGS-SP-02	5.46	214774187	38581753	0.79	25309598	0.59		no	NA	NA	NA	NA			NA	NA	NA	NA	NA	NA	NA	NA	NA	NA	NA	NA
Healthy	LB-Neg-63	LB-Neg-63-P-01	m	44	NA	NA	NA	yes	NA	NA	NA	NA	NA	NA	NA	NA	NA	NA	Plasma	172	2.82	7.5	LB_WGS-SP-02	4.87	171242517	15940473	0.53	16785144	1.04		no	NA	NA	NA	NA			NA	NA	NA	NA	NA	NA	NA	NA	NA	NA	NA	NA
Healthy	LB-Neg-64	LB-Neg-64-P-01	f	72	NA	NA	NA	yes	NA	NA	NA	NA	NA	NA	NA	NA	NA	NA	Plasma	171	2.39	7.5	LB_WGS-SP-02	3.94	137947878	12100954	0.39	12608990	1.34		no	NA	NA	NA	NA			NA	NA	NA	NA	NA	NA	NA	NA	NA	NA	NA	NA
Healthy	LB-Neg-65	LB-Neg-65-P-01	m	73	NA	NA	NA	no	NA	NA	NA	NA	NA	NA	NA	NA	NA	NA	Plasma	172	3.04	7.5	LB_WGS-SP-02	3.71	130639508	12192546	0.42	13456488	1.48		no	NA	NA	NA	NA			NA	NA	NA	NA	NA	NA	NA	NA	NA	NA	NA	NA
Healthy	LB-Neg-66	LB-Neg-66-P-01	f	47	NA	NA	NA		NA	NA	NA	NA	NA	NA	NA	NA	NA	NA	Plasma	165	1.7316	7.5	LB_WGS-SP-07	10.1	352357248	29933860	1.19	38108641	NA	NA	no	NA	NA	NA	NA	NA	NA	NA	NA	NA	NA	NA	NA	NA	NA	NA	NA	NA	NA
Healthy	LB-Neg-67	LB-Neg-67-P-01	f	39	NA	NA	NA	yes	NA	NA	NA	NA	NA	NA	NA	NA	NA	NA	Plasma	174	2.15	7.5	LB_WGS-SP-02	4.33	151595923	13440834	0.35	11233781	1.14		no	NA	NA	NA	NA			NA	NA	NA	NA	NA	NA	NA	NA	NA	NA	NA	NA
Healthy	LB-Neg-68	LB-Neg-68-P-01	f	40	NA	NA	NA	no	NA	NA	NA	NA	NA	NA	NA	NA	NA	NA	Plasma	173	1.92	7.5	LB_WGS-SP-02	4.62	163098513	15469818	0.65	20834705	0.99		no	NA	NA	NA	NA			NA	NA	NA	NA	NA	NA	NA	NA	NA	NA	NA	NA
Healthy	LB-Neg-69	LB-Neg-69-P-01	m	56	NA	NA	NA	yes	NA	NA	NA	NA	NA	NA	NA	NA	NA	NA	Plasma	173	3.41	6.5	LB_WGS-SP-02	6.34	244415187	40109903	0.93	29888359	0.403939		no	NA	NA	NA	NA			NA	NA	NA	NA	NA	NA	NA	NA	NA	NA	NA	NA
Healthy	LB-Neg-70	LB-Neg-70-P-01	m	26	NA	NA	NA	yes	NA	NA	NA	NA	NA	NA	NA	NA	NA	NA	Plasma	174	1.29	6.5	LB_WGS-SP-02	6.1	231331432	35811155	0.67	21573509	0.206514		no	NA	NA	NA	NA			NA	NA	NA	NA	NA	NA	NA	NA	NA	NA	NA	NA
Healthy	LB-Neg-71	LB-Neg-71-P-01	f	36	NA	NA	NA	yes	NA	NA	NA	NA	NA	NA	NA	NA	NA	NA	Plasma	173	1.52	7.5	LB_WGS-SP-02	5.3	205170953	33892468	0.64	20813321	0.360896		no	NA	NA	NA	NA			NA	NA	NA	NA	NA	NA	NA	NA	NA	NA	NA	NA
Healthy	LB-Neg-72	LB-Neg-72-P-01	m	30	NA	NA	NA	yes	NA	NA	NA	NA	NA	NA	NA	NA	NA	NA	Plasma	178	2.46	7	LB_WGS-SP-02	7.92	312478987	56424102	0.98	31649092	1.92851		no	NA	NA	NA	NA			NA	NA	NA	NA	NA	NA	NA	NA	NA	NA	NA	NA
Healthy	LB-Neg-73	LB-Neg-73-P-01	m	38	NA	NA	NA	yes	NA	NA	NA	NA	NA	NA	NA	NA	NA	NA	Plasma	177	3.04	7.5	LB_WGS-SP-02	6.06	228681450	34367271	0.6	19167486	1.60863		no	NA	NA	NA	NA			NA	NA	NA	NA	NA	NA	NA	NA	NA	NA	NA	NA
Healthy	LB-Neg-74	LB-Neg-74-P-01	m	29	NA	NA	NA	no	NA	NA	NA	NA	NA	NA	NA	NA	NA	NA	Plasma	178	2.4	7	LB_WGS-SP-02	5.62	218498697	37642545	0.67	21539026	0.725466		no	NA	NA	NA	NA			NA	NA	NA	NA	NA	NA	NA	NA	NA	NA	NA	NA
Healthy	LB-Neg-75	LB-Neg-75-P-01	m	25	NA	NA	NA	yes	NA	NA	NA	NA	NA	NA	NA	NA	NA	NA	Plasma	174	4.22	7	LB_WGS-SP-02	5.44	207963264	32822090	0.77	24855116	1.72563		no	NA	NA	NA	NA			NA	NA	NA	NA	NA	NA	NA	NA	NA	NA	NA	NA
Healthy	LB-Neg-78	LB-Neg-78-P-01	m	24	NA	NA	NA	yes	NA	NA	NA	NA	NA	NA	NA	NA	NA	NA	Plasma	176	2.63	7.5	LB_WGS-SP-02	4.36	167196202	27626596	0.39	12368329	0.0971866		no	NA	NA	NA	NA			NA	NA	NA	NA	NA	NA	NA	NA	NA	NA	NA	NA
Healthy	LB-Neg-80	LB-Neg-80-P-01	m	22	NA	NA	NA	yes	NA	NA	NA	NA	NA	NA	NA	NA	NA	NA	Plasma	177	3.78	7.5	LB_WGS-SP-02	7.03	273500113	47711917	0.84	27059229	0.553324		no	NA	NA	NA	NA			NA	NA	NA	NA	NA	NA	NA	NA	NA	NA	NA	NA
Healthy	LB-Neg-81	LB-Neg-81-P-01	m	42	NA	NA	NA	yes	NA	NA	NA	NA	NA	NA	NA	NA	NA	NA	Plasma	174	5.48	7.5	LB_WGS-SP-02	6.88	262321900	41784076	0.73	23327441	0		no	NA	NA	NA	NA			NA	NA	NA	NA	NA	NA	NA	NA	NA	NA	NA	NA
Healthy	LB-Neg-83	LB-Neg-83-P-01	f	30	NA	NA	NA		NA	NA	NA	NA	NA	NA	NA	NA	NA	NA	Plasma	168	1.0752	7.5	LB_WGS-SP-07	8.4	292300375	24125353	1	31900734	NA	NA	no	NA	NA	NA	NA	NA	NA	NA	NA	NA	NA	NA	NA	NA	NA	NA	NA	NA	NA
Healthy	LB-Neg-84	LB-Neg-84-P-01	m	31	NA	NA	NA		NA	NA	NA	NA	NA	NA	NA	NA	NA	NA	Plasma	166	1.69015	6.5	LB_WGS-SP-07	8.57	299333677	25720253	1.4	44814456	NA	NA	no	NA	NA	NA	NA	NA	NA	NA	NA	NA	NA	NA	NA	NA	NA	NA	NA	NA	NA
Healthy	LB-Neg-85	LB-Neg-85-P-01	m	33	NA	NA	NA		NA	NA	NA	NA	NA	NA	NA	NA	NA	NA	Plasma	166	0.822923	6.5	LB_WGS-SP-07	8.06	284185602	26965438	1.02	32576320	NA	NA	no	NA	NA	NA	NA	NA	NA	NA	NA	NA	NA	NA	NA	NA	NA	NA	NA	NA	NA
Healthy	LB-Neg-86	LB-Neg-86-P-01	f	28	NA	NA	NA		NA	NA	NA	NA	NA	NA	NA	NA	NA	NA	Plasma	162	1.1204	7.5	LB_WGS-SP-07	8.44	295745794	26284209	1.17	37366514	NA	NA	no	NA	NA	NA	NA	NA	NA	NA	NA	NA	NA	NA	NA	NA	NA	NA	NA	NA	NA
[truncated: 2 more columns]

## Sheet: Supplementary Table 3
Supplementary Table 3: chromosome specific log2-thresholds for SCNA calling in females
chrom	LOB_neg	LOB_pos
chr1	-0.150421	0.13582
chr2	-0.153124	0.137906
chr3	-0.153243	0.137979
chr4	-0.155542	0.141987
chr5	-0.153081	0.139989
chr6	-0.153452	0.138807
chr7	-0.152274	0.137551
chr8	-0.153353	0.137391
chr9	-0.151239	0.136383
chr10	-0.151375	0.135419
chr11	-0.151493	0.136054
chr12	-0.151866	0.138169
chr13	-0.155235	0.140864
chr14	-0.151045	0.138416
chr15	-0.148267	0.135278
chr16	-0.148293	0.135233
chr17	-0.146067	0.134314
chr18	-0.153307	0.140013
chr19	-0.145325	0.133505
chr20	-0.149341	0.132821
chr21	-0.151207	0.139976
chr22	-0.143204	0.130565
chrX	-0.135427	0.157785
chrY	NA	NA

## Sheet: Supplementary Table 4
Supplementary Table 4: chromosome specific log2-thresholds for SCNA calling in males
chrom	LOB_neg	LOB_pos
chr1	-0.143051	0.138928
chr2	-0.143992	0.143631
chr3	-0.145758	0.144392
chr4	-0.150848	0.145265
chr5	-0.148109	0.142523
chr6	-0.145879	0.144137
chr7	-0.145365	0.143477
chr8	-0.146053	0.143946
chr9	-0.14357	0.139904
chr10	-0.143789	0.140845
chr11	-0.143603	0.140284
chr12	-0.145688	0.141498
chr13	-0.149465	0.144685
chr14	-0.14448	0.142294
chr15	-0.142198	0.138077
chr16	-0.141577	0.136034
chr17	-0.139067	0.136698
chr18	-0.145994	0.139235
chr19	-0.140351	0.133146
chr20	-0.139848	0.135554
chr21	-0.146995	0.139388
chr22	-0.137883	0.131453
chrX	-0.204673	0.183055
chrY	-0.230308	0.175563

## Sheet: Supplementry Table 5
Supplementary Table 5: Machine learning input features
LB_sample_ID	patient	Sample.type	UICC.stage	time.after.initial.treatment	clinical.data.indicating.presence.of.tumor..PET.SCAN..MRI..CT.	ddPCR_positive	sample.timepoint	staging	FS_P.20_150.	FS_P.100_150.	FS_P.125_180.	FS_P.160_180.	FS_P.180_220.	FS_P.250_320.	FS_P.160_180..P.180_220.	FS_P.20_150..P.160_180.	FS_P.100_150..P.163_169.	FS_P.20_150..P.180_220.	FS_amplitude_10bp	5mb_allbins_readsums_chr1_101388400_103594400	5mb_allbins_readsums_chr1_103760600_108760600	5mb_allbins_readsums_chr1_108760600_113760600	5mb_allbins_readsums_chr1_113760600_118760600	5mb_allbins_readsums_chr1_118760600_121605200	5mb_allbins_readsums_chr1_13004384_16799164	5mb_allbins_readsums_chr1_143562200_148562200	5mb_allbins_readsums_chr1_148562200_153562200	5mb_allbins_readsums_chr1_153562200_158562200	5mb_allbins_readsums_chr1_158562200_161423100	5mb_allbins_readsums_chr1_161472400_166472400	5mb_allbins_readsums_chr1_166472400_168348600	5mb_allbins_readsums_chr1_168349900_173349900	5mb_allbins_readsums_chr1_16849163_21849163	5mb_allbins_readsums_chr1_173349900_178349900	5mb_allbins_readsums_chr1_178349900_183349900	5mb_allbins_readsums_chr1_183349900_188349900	5mb_allbins_readsums_chr1_188349900_193349900	5mb_allbins_readsums_chr1_193349900_198349900	5mb_allbins_readsums_chr1_198349900_203349900	5mb_allbins_readsums_chr1_203349900_208349900	5mb_allbins_readsums_chr1_208349900_213349900	5mb_allbins_readsums_chr1_213349900_218349900	5mb_allbins_readsums_chr1_218349900_223349900	5mb_allbins_readsums_chr1_21849163_26849163	5mb_allbins_readsums_chr1_224017000_228558365	5mb_allbins_readsums_chr1_228608364_233608364	5mb_allbins_readsums_chr1_233608364_236713000	5mb_allbins_readsums_chr1_236715600_241715600	5mb_allbins_readsums_chr1_241715600_246715600
LB-CRC-01-P-01	LB-CRC-01	CRC	II	-3	yes	0	baseline	diagnosis	0.199422	0.199244	0.892782	0.528925	0.081629	3.89187e-08	6.47962	0.377032	0.891208	2.44303	-0.00220783	-1.44597	0.26659	0.791177	0.670416	-1.8579	0.269406	-1.34654	-0.181217	1.01543	-1.02275	0.666678	-1.75561	0.593852	1.65767	0.629052	0.69216	0.486762	0.308652	0.34341	0.780961	0.995576	0.701451	0.581607	0.618475	1.39944	0.563313	0.902185	-0.732467	0.589162	0.54901
LB-CRC-01-P-02	LB-CRC-01	CRC	II	3	no	0	post_surgery_1	remission	0.172647	0.168337	0.766031	0.51249	0.182028	4.86443e-08	2.81545	0.336879	0.892429	0.948466	-0.00387262	-1.27094	0.727437	0.610154	0.675187	-1.86946	-0.255136	-1.39963	-0.359523	0.554505	-1.02697	0.668903	-1.72756	0.887341	0.75933	0.691391	0.598616	0.810226	0.887272	0.829049	0.533576	0.517014	0.657409	0.877195	0.755979	0.622712	0.276867	0.623688	-0.846412	0.771143	0.530943
LB-CRC-01-P-03	LB-CRC-01	CRC	II	36	no	0	post_surgery_1	remission	0.162411	0.161557	0.870033	0.555796	0.110214	5.83145e-08	5.04287	0.292214	0.724618	1.4736	-0.00257696	-1.4807	0.0714837	0.848471	0.607695	-1.81383	0.487898	-1.28178	-0.119064	1.19029	-0.973201	0.551923	-1.71802	0.428251	1.9978	0.550755	0.691435	0.300601	0.0817762	0.110989	0.848433	1.14839	0.692447	0.444272	0.506625	1.67842	0.705314	0.973281	-0.670862	0.479868	0.579152
LB-CRC-04-P-01	LB-CRC-04	CRC	IV	0	yes	0	baseline	diagnosis	0.189469	0.187572	0.744981	0.444726	0.205321	0.00419185	2.16601	0.426034	1.20492	0.922793	-0.000496194	-0.913657	0.0281435	0.277794	0.201966	-1.02511	-0.177541	-0.643104	-0.0398436	0.564831	-0.503096	0.332498	-0.915583	0.370719	0.439731	0.35546	0.295697	0.214001	0.171276	0.14303	0.232024	0.323578	0.220043	0.196073	0.157327	0.314514	0.145742	0.259753	-0.483632	0.17027	0.220176
LB-CRC-07-P-02	LB-CRC-07	CRC	II	3	no	0	post_surgery_1	remission	0.163658	0.162866	0.820925	0.529853	0.153295	4.25e-08	3.45642	0.308875	0.809528	1.0676	-0.000756397	-1.50313	-0.256247	0.951125	0.594758	-1.65244	0.755277	-1.14211	0.0260054	1.34933	-0.85087	0.566512	-1.60403	0.254712	2.47114	0.47459	0.711356	0.100623	-0.328049	-0.234063	0.999415	1.50256	0.743069	0.262231	0.439692	2.05357	0.769503	1.14549	-0.558853	0.279051	0.50237
LB-CRC-07-P-08	LB-CRC-07	CRC	II	584	yes	1	chemo_1	partial_remission	0.209751	0.20587	0.813542	0.49313	0.133461	9.52e-08	3.69494	0.425347	1.06215	1.57163	-0.000756876	-1.43476	0.331755	0.794172	0.714909	-1.88231	0.146465	-1.36611	-0.230793	0.916308	-1.05283	0.70117	-1.78425	0.694199	1.55544	0.676829	0.694133	0.549019	0.347072	0.386171	0.741468	0.967599	0.778328	0.704587	0.696261	1.26646	0.514071	0.922003	-0.785813	0.636533	0.538041
LB-CRC-07-P-09	LB-CRC-07	CRC	II	616	yes	0	chemo_1	partial_remission	0.177608	0.174245	0.799615	0.51851	0.156265	6.27e-08	3.31814	0.342536	0.904926	1.13658	-0.00102103	-1.49477	0.0183213	0.884885	0.674837	-1.81471	0.490558	-1.27598	-0.0750888	1.20914	-0.956244	0.6277	-1.71769	0.491428	1.99417	0.582911	0.693461	0.304159	-0.0294638	0.0248994	0.838743	1.24017	0.75281	0.453577	0.548597	1.71038	0.684732	1.01007	-0.665943	0.493168	0.605221
LB-CRC-07-P-10	LB-CRC-07	CRC	II	644	yes	0	chemo_1	stable_disease	0.169345	0.16831	0.807528	0.524018	0.155392	6.39e-08	3.37223	0.323167	0.848755	1.08979	-0.000488683	-1.41027	0.399587	0.718903	0.693298	-1.89295	0.126428	-1.37825	-0.257131	0.861072	-1.06614	0.689029	-1.78695	0.705417	1.44301	0.66599	0.654261	0.570409	0.472748	0.50637	0.71885	0.898738	0.701895	0.691844	0.674352	1.20323	0.483319	0.86637	-0.818902	0.665486	0.544383
LB-CRC-07-P-11	LB-CRC-07	CRC	II	672	yes	0	chemo_1	stable_disease	0.166709	0.165578	0.803104	0.520782	0.16113	1.07e-08	3.23205	0.320112	0.836994	1.03462	-0.000672003	-1.41714	0.365346	0.756564	0.69881	-1.89905	0.147662	-1.38388	-0.243302	0.878127	-1.06148	0.697062	-1.77769	0.703909	1.46397	0.673412	0.660323	0.579668	0.457715	0.466954	0.718857	0.916243	0.722917	0.663698	0.675793	1.22236	0.484908	0.881789	-0.809173	0.673866	0.552383
LB-CRC-07-P-12	LB-CRC-07	CRC	II	696	yes	0	chemo_1	stable_disease	0.142395	0.142126	0.855028	0.579637	0.124633	6.09e-08	4.65074	0.245662	0.626514	1.14251	-0.00188613	-1.47013	0.228598	0.883391	0.71801	-1.86333	0.246214	-1.2946	-0.113853	1.11192	-0.950107	0.64683	-1.71294	0.774883	1.6545	0.655089	0.784192	0.563742	0.268012	0.336791	0.823904	1.13704	0.765042	0.527075	0.636115	1.44248	0.621476	0.98342	-0.7218	0.500371	0.556788
LB-CRC-07-P-13	LB-CRC-07	CRC	II	704	yes	0	chemo_1	stable_disease	0.14553	0.145142	0.816135	0.557325	0.154201	9.68e-08	3.61428	0.261123	0.700914	0.943771	-0.0020331	-1.42913	0.295377	0.782236	0.679176	-1.86846	0.206455	-1.36222	-0.164915	0.9623	-1.05171	0.68504	-1.76037	0.642475	1.60312	0.636477	0.695494	0.563114	0.422698	0.439241	0.783931	0.997131	0.736938	0.610115	0.663694	1.32152	0.519582	0.957525	-0.786314	0.608018	0.536379
LB-CRC-07-P-14	LB-CRC-07	CRC	II	758	yes	0	chemo_1	stable_disease	0.251039	0.236121	0.817025	0.482059	0.106983	7.53e-08	4.50595	0.520764	1.24295	2.34654	0.00151898	-1.43885	0.322748	0.776197	0.696633	-1.8873	0.181712	-1.33201	-0.199451	0.97363	-1.04491	0.648562	-1.7787	0.649751	1.56723	0.605212	0.670377	0.521906	0.387672	0.423311	0.733409	0.961603	0.724869	0.633352	0.624294	1.36112	0.53027	0.856923	-0.778709	0.619127	0.564243
LB-CRC-07-P-15	LB-CRC-07	CRC	II	799	yes	0	CIP_1	stable_disease	0.280614	0.258298	0.816526	0.474084	0.0877052	4.52e-08	5.40542	0.591907	1.34472	3.19951	0.00134303	-1.47293	0.161228	0.855291	0.676794	-1.85393	0.365399	-1.2873	-0.111943	1.13085	-0.993383	0.649955	-1.74355	0.572959	1.83127	0.609823	0.706377	0.4357	0.172961	0.183353	0.856997	1.12516	0.729164	0.51845	0.587916	1.55894	0.61907	0.986114	-0.718441	0.540535	0.577964
LB-CRC-07-P-16	LB-CRC-07	CRC	II	822	yes	0	CIP_1	stable_disease	0.288978	0.258986	0.807943	0.453496	0.0919809	2.49e-08	4.93033	0.637222	1.40414	3.14172	0.00170829	-1.4723	0.0333051	0.879158	0.625738	-1.78375	0.533383	-1.24553	-0.0717872	1.27591	-0.921489	0.647795	-1.68381	0.477994	2.11232	0.483327	0.70609	0.376518	0.103899	0.136964	1.02932	1.39021	0.72048	0.312319	0.548819	1.85687	0.695126	1.11918	-0.664861	0.414628	0.524325
LB-CRC-07-P-17	LB-CRC-07	CRC	II	862	yes	0	CIP_1	stable_disease	0.146997	0.146256	0.816575	0.541141	0.160561	9.55e-08	3.37031	0.271642	0.71381	0.915517	-0.00189727	-1.47202	-0.208876	0.919541	0.515057	-1.70005	0.82277	-1.13318	0.0313545	1.42118	-0.883754	0.46771	-1.59683	0.223206	2.50127	0.354223	0.657228	0.0982217	-0.202787	-0.167568	1.02818	1.46598	0.640866	0.152345	0.367804	2.18498	0.850848	1.06871	-0.576173	0.270093	0.514448
LB-CRC-07-P-18	LB-CRC-07	CRC	II	893	yes	0	CIP_1	stable_disease	0.171367	0.169909	0.853635	0.549783	0.118706	7.26e-08	4.63148	0.311699	0.772593	1.44363	-0.00194285	-1.47853	-0.0145948	0.887886	0.585894	-1.78596	0.58269	-1.24139	-0.0422163	1.29564	-0.939777	0.580041	-1.6891	0.404463	2.19014	0.467652	0.698153	0.282801	0.0386109	0.0842949	1.00551	1.3403	0.692918	0.314493	0.486305	1.90188	0.731932	1.06021	-0.663042	0.399231	0.529207
LB-CRC-07-P-19	LB-CRC-07	CRC	II	946	yes	0	CIP_1	stable_disease	0.0993357	0.0989409	0.682754	0.483213	0.286859	0.000924337	1.6845	0.205573	0.636707	0.346288	-0.000443075	-1.39811	0.352711	0.74403	0.674719	-1.8782	0.218848	-1.35855	-0.199306	0.930419	-1.03871	0.724666	-1.76391	0.649709	1.61206	0.595883	0.67527	0.593298	0.511735	0.509752	0.85111	0.993804	0.703758	0.587616	0.661356	1.34361	0.498028	0.951046	-0.805855	0.63692	0.519092
LB-CRC-07-P-20	LB-CRC-07	CRC	II	1004	yes	0	CIP_1	stable_disease	0.116866	0.116062	0.688867	0.474173	0.278719	0.000212582	1.70126	0.246464	0.763228	0.419299	0.00016481	-1.41764	0.285807	0.777646	0.66077	-1.87201	0.27575	-1.34633	-0.180597	0.986232	-1.02175	0.704785	-1.75807	0.622351	1.68851	0.594122	0.689551	0.530115	0.431287	0.450515	0.866959	1.05355	0.704986	0.547886	0.644707	1.43727	0.536235	0.960141	-0.765984	0.587617	0.537702
LB-CRC-07-P-21	LB-CRC-07	CRC	II	1065	yes	0	CIP_1	stable_disease	0.128183	0.127308	0.711906	0.483972	0.257733	1.01e-07	1.8778	0.264856	0.814668	0.497347	0.000409016	-1.42777	0.297729	0.787817	0.631556	-1.88358	0.302043	-1.34809	-0.151339	1.06147	-1.02613	0.650588	-1.76782	0.580447	1.75127	0.553026	0.668196	0.495479	0.391887	0.37839	0.84648	1.0656	0.691803	0.51935	0.603243	1.50498	0.563965	0.932655	-0.779149	0.555403	0.524378
LB-CRC-07-P-06	LB-CRC-07	CRC	II	303	no	1	post_surgery_1	remission	0.143993	0.141485	0.701893	0.466523	0.254689	0.00113043	1.83174	0.308651	0.92651	0.565368	0.000998737	-1.4799	0.0875854	0.860407	0.69593	-1.81178	0.396107	-1.28187	-0.120278	1.14478	-0.945168	0.698148	-1.72069	0.571634	1.88607	0.615098	0.688053	0.424598	0.0888442	0.152332	0.868814	1.2257	0.743956	0.503058	0.617407	1.6107	0.599007	1.01979	-0.716665	0.508124	0.553632
LB-CRC-08-P-01	LB-CRC-08	CRC	IV	-1	yes	0	baseline	diagnosis	0.257793	0.243186	0.817038	0.461303	0.110912	9.48e-08	4.15919	0.558837	1.31101	2.32431	0.00256689	-1.45215	0.188464	0.824341	0.619039	-1.84937	0.342537	-1.30956	-0.0339932	1.14352	-0.892789	0.750389	-1.72302	0.566236	1.82397	0.569655	0.648011	0.454609	0.242501	0.313134	0.853166	1.08597	0.703921	0.514906	0.643265	1.55543	0.629371	1.00515	-0.675058	0.528408	0.548536
LB-CRC-08-P-02	LB-CRC-08	CRC	IV	3	yes	0	post_surgery_1	therapy	0.154407	0.153758	0.817647	0.522948	0.161667	8.91e-08	3.23473	0.295262	0.782252	0.955092	-0.00245264	-1.48202	0.0169855	0.822724	0.566556	-1.81862	0.56424	-1.27769	-0.00477734	1.25725	-0.97233	0.517114	-1.70806	0.317647	2.11936	0.49348	0.667899	0.249194	0.0193654	0.0626819	0.858568	1.15456	0.687682	0.420581	0.447346	1.79538	0.725422	0.951292	-0.658576	0.47348	0.519523
LB-CRC-08-P-03	LB-CRC-08	CRC	IV	34	yes	0	post_surgery_1	therapy	0.213716	0.212449	0.858778	0.492072	0.112723	5.81e-08	4.36533	0.434319	1.04731	1.89595	0.00125462	-1.46536	0.134859	0.825746	0.624145	-1.86594	0.463106	-1.31083	-0.0901175	1.21406	-0.927088	0.643254	-1.71201	0.47946	1.93897	0.528175	0.665967	0.344655	0.181017	0.210384	0.892931	1.15538	0.677593	0.465177	0.523682	1.68241	0.708134	0.956372	-0.706523	0.499574	0.551614
LB-CRC-08-P-04	LB-CRC-08	CRC	IV	85	yes	0	chemo_1	therapy	0.184221	0.183789	0.850759	0.521876	0.125162	6.26e-08	4.16962	0.352997	0.878537	1.47186	9.72e-05	-1.44795	0.228857	0.739916	0.609835	-1.90048	0.28024	-1.37111	-0.127171	1.1383	-0.886439	0.796699	-1.75027	0.559697	1.67704	0.523609	0.614083	0.384665	0.284829	0.331326	0.827661	1.01802	0.687529	0.592241	0.63564	1.42227	0.67776	0.958592	-0.720636	0.612588	0.611566
LB-CRC-08-P-05	LB-CRC-08	CRC	IV	181	yes	0	chemo_2	progressive_disease	0.207867	0.206903	0.86797	0.500854	0.10471	7.51e-08	4.78324	0.415025	0.98957	1.98516	-0.00015143	-1.47927	0.0615129	0.730995	0.535983	-1.86479	0.324978	-1.33493	-0.034159	1.36176	-0.644114	1.03807	-1.67977	0.513965	1.79064	0.447312	0.558799	0.300196	0.112816	0.237297	0.924214	1.15845	0.680453	0.537549	0.700802	1.53115	0.753807	1.13096	-0.623678	0.632053	0.651234
LB-CRC-08-P-06	LB-CRC-08	CRC	IV	352	yes	0	pal_chemo	progressive_disease	0.270439	0.267239	0.878238	0.453841	0.0831743	1.02e-07	5.4565	0.595889	1.40647	3.25147	0.00076217	-1.47148	-0.464112	0.214072	-0.0314143	-1.67778	0.0254035	-1.27567	0.289867	2.21026	0.826563	2.25213	-1.16572	0.380052	1.13594	-0.166906	-0.0318186	-0.353228	-0.532988	-0.132991	0.721861	0.929948	0.436279	0.529625	1.02895	0.890154	1.36039	1.564	-0.00959303	0.994042	1.23072
LB-CRC-08-P-07	LB-CRC-08	CRC	IV	370	yes	0	pal_chemo	progressive_disease	0.25124	0.249185	0.874085	0.462788	0.0912148	8.11e-08	5.07361	0.542883	1.29173	2.75437	-0.000216238	-1.4079	-0.230265	0.104465	0.0224698	-1.71907	-0.266535	-1.34484	0.168497	1.8946	0.856807	2.63476	-1.19102	0.621729	0.653905	-0.0720399	-0.0932047	-0.169929	-0.304655	0.139161	0.559607	0.651721	0.430705	0.831312	1.23528	0.468132	1.05792	1.4565	-0.147061	1.25585	1.19709
LB-CRC-13-P-01	LB-CRC-13	CRC	IV	0	yes	0	baseline	diagnosis	0.182206	0.181151	0.753986	0.461001	0.210791	0.000227203	2.18701	0.39524	1.15471	0.864395	0.00170344	-1.35108	0.408026	0.657803	0.640746	-1.86591	0.0305485	-1.41857	-0.244437	0.756384	-1.09764	0.691083	-1.78873	0.625749	1.38222	0.622984	0.653354	0.613268	0.539006	0.595397	0.707536	0.840767	0.697624	0.680626	0.645439	1.07494	0.392095	0.838629	-0.815145	0.649541	0.480503
LB-CRC-13-P-02	LB-CRC-13	CRC	IV	6	yes	0	post_surgery_1	therapy	0.155123	0.154566	0.792724	0.502405	0.185395	4.35286e-08	2.70992	0.308761	0.843735	0.836717	-0.00168145	-1.40209	0.298596	0.729915	0.672033	-1.82202	0.177597	-1.3536	-0.184334	0.916307	-1.05696	0.701582	-1.77299	0.559042	1.6369	0.62698	0.663944	0.508485	0.339188	0.422664	0.771731	0.993034	0.747585	0.644893	0.629748	1.30105	0.471314	0.960969	-0.748453	0.655387	0.495803
LB-CRC-15-P-02	LB-CRC-15	CRC	II	4	no	0	post_surgery_1	remission	0.142913	0.142649	0.849548	0.550012	0.136131	1.01e-07	4.04032	0.259836	0.634073	1.04982	-0.00228369	-1.39043	0.301233	0.795689	0.663567	-1.856	0.18952	-1.33455	-0.15724	1.03318	-1.04361	0.62567	-1.75503	0.568403	1.68801	0.648831	0.718446	0.51131	0.329927	0.425472	0.787936	1.00603	0.705525	0.585803	0.592536	1.35382	0.583775	0.867836	-0.724428	0.567279	0.523648
LB-CRC-15-P-01	LB-CRC-15	CRC	II	-1	yes	0	baseline	diagnosis	0.138197	0.137964	0.774775	0.512117	0.203805	5.04e-08	2.51278	0.269855	0.746509	0.678087	-0.00014029	-1.40582	0.242921	0.790916	0.647871	-1.8479	0.267173	-1.32199	-0.123467	1.08387	-0.993476	0.681257	-1.75082	0.608893	1.73125	0.603652	0.696147	0.461936	0.309958	0.373758	0.831451	1.05245	0.714301	0.525063	0.58503	1.47795	0.589587	0.948453	-0.739329	0.570129	0.517803
LB-CRC-15-P-03	LB-CRC-15	CRC	II	26	no	0	post_surgery_1	remission	0.149814	0.149681	0.841492	0.541335	0.143027	6.24e-08	3.78484	0.276749	0.68772	1.04745	-0.00201658	-1.40092	0.318684	0.79061	0.677062	-1.8485	0.17267	-1.34296	-0.175687	0.997498	-1.02498	0.656492	-1.76322	0.617899	1.61073	0.635785	0.704572	0.497429	0.359535	0.422941	0.771262	0.964805	0.720004	0.598837	0.616967	1.35406	0.574316	0.908883	-0.75511	0.588471	0.516049
LB-CRC-15-P-04	LB-CRC-15	Healthy_control	II	60	no	0	post_surgery_1	remission	0.137786	0.13738	0.804972	0.532419	0.176013	7.4e-08	3.02489	0.258793	0.689898	0.782819	-0.00096059	-1.484	-0.0582361	0.888091	0.57254	-1.75008	0.571025	-1.21502	0.00254262	1.35208	-0.920744	0.548218	-1.65211	0.362005	2.21381	0.47898	0.679922	0.214189	-0.0799337	0.0057224	0.915451	1.26428	0.674922	0.30628	0.422953	1.89733	0.779202	1.00964	-0.629987	0.381394	0.513846
LB-CRC-17-P-02	LB-CRC-17	CRC	I	6	no	0	post_surgery_1	remission	0.13979	0.139644	0.843719	0.564469	0.143874	2.56304e-08	3.92336	0.247648	0.637868	0.971615	-0.000989847	-1.43106	0.286811	0.753334	0.634344	-1.8933	0.32491	-1.35142	-0.137842	1.04139	-1.02402	0.629302	-1.78882	0.551907	1.76929	0.594065	0.664818	0.500421	0.373886	0.38825	0.820294	1.04279	0.715261	0.572966	0.569857	1.43475	0.559779	0.933155	-0.780583	0.569906	0.505764
LB-CRC-17-P-01	LB-CRC-17	CRC	I	-1	yes	0	baseline	diagnosis	0.159056	0.158802	0.81053	0.521111	0.166862	1.5063e-08	3.123	0.305226	0.813988	0.95322	0.000658042	-1.43588	0.267504	0.802585	0.654603	-1.87536	0.29822	-1.3451	-0.126961	1.07787	-1.01209	0.629078	-1.77271	0.575535	1.76902	0.607199	0.688451	0.469311	0.327627	0.376458	0.808026	1.05275	0.719357	0.550515	0.594605	1.45058	0.597667	0.932918	-0.748252	0.558348	0.496506
LB-CRC-20-P-02	LB-CRC-20	CRC	II	5	no	0	post_surgery_1	remission	0.166722	0.166252	0.831587	0.519773	0.147983	5.46e-08	3.51237	0.32076	0.806707	1.12663	-0.00105074	-1.48653	-0.093624	0.850861	0.565545	-1.763	0.702931	-1.18745	0.00263154	1.32096	-0.908825	0.494767	-1.66826	0.238757	2.30464	0.432973	0.673276	0.181627	-0.0935954	-0.052418	0.949787	1.32419	0.676233	0.305438	0.377947	1.98082	0.787865	1.0442	-0.621564	0.376869	0.519365
LB-CRC-20-P-01	LB-CRC-20	CRC	II	-1	yes	0	baseline	diagnosis	0.125716	0.125602	0.777256	0.527532	0.203948	0	2.5866	0.238311	0.668475	0.616414	-0.000549415	-1.40269	0.31545	0.743243	0.669427	-1.84465	0.254378	-1.34361	-0.153177	0.957433	-1.01015	0.720499	-1.74536	0.636925	1.61268	0.616803	0.669666	0.554349	0.409185	0.495692	0.830772	0.997386	0.723413	0.608729	0.633386	1.34623	0.497627	0.965372	-0.783698	0.606496	0.487387
LB-CRC-20-P-03	LB-CRC-20	CRC	II	33	no	0	post_surgery_1	remission	0.110726	0.110591	0.733669	0.507216	0.243412	8.57e-08	2.08377	0.218302	0.633229	0.454891	-0.000361677	-1.37576	0.389983	0.705218	0.65413	-1.88036	0.171261	-1.36962	-0.182982	0.886023	-1.05642	0.71199	-1.76242	0.627228	1.52797	0.618267	0.680687	0.584483	0.506551	0.566001	0.754423	0.900068	0.69291	0.63974	0.645587	1.23831	0.50014	0.883535	-0.806381	0.650067	0.50062
LB-CRC-21-P-02	LB-CRC-21	CRC	IV	8	no	0	post_surgery_1	therapy	0.151954	0.151624	0.818442	0.535529	0.157528	0	3.39958	0.283745	0.742207	0.964614	-0.00173352	-1.51577	-0.0588265	0.443134	0.294012	-1.84361	-0.0848249	-1.15064	-0.0928976	1.06467	-0.926888	0.616515	-1.67189	0.513919	1.15588	0.53057	0.646869	0.42714	0.276237	0.280481	0.809523	1.05588	0.694677	0.4382	0.532642	0.846578	0.587441	0.914543	-0.692864	0.461278	0.474545
LB-CRC-21-P-01	LB-CRC-21	CRC	IV	-4	yes	0	baseline	diagnosis	0.188423	0.186498	0.775116	0.467569	0.18709	7.33e-08	2.49916	0.402985	1.1046	1.00713	0.000595901	-1.52015	-5.15875e-05	0.675524	0.452953	-1.8558	0.187014	-1.15252	-0.0511839	1.2115	-0.923513	0.62055	-1.71678	0.493666	1.64142	0.521424	0.693462	0.415104	0.217753	0.221932	0.911672	1.22278	0.687721	0.382007	0.543335	1.35478	0.672409	0.983128	-0.685081	0.441366	0.493876
LB-CRC-21-P-03	LB-CRC-21	CRC	IV	43	no	0	chemo_1	therapy	0.105782	0.105713	0.758867	0.527715	0.224056	1.03e-07	2.35528	0.200452	0.563473	0.472121	-0.00112136	-1.44388	0.328768	0.746973	0.671945	-1.87416	0.220079	-1.26027	-0.195737	0.961178	-1.04323	0.68053	-1.79078	0.636703	1.67257	0.620694	0.663961	0.527039	0.424195	0.462063	0.786716	1.0084	0.715344	0.59683	0.644502	1.36808	0.540025	0.943852	-0.77898	0.60956	0.522135
LB-CRC-22-P-01	LB-CRC-22	CRC	III	-1	yes	0	baseline	diagnosis	0.212521	0.21096	0.83531	0.479593	0.135846	2.91462e-08	3.53041	0.443129	1.11461	1.56443	0.000738506	-1.41027	0.305593	0.767649	0.648049	-1.85159	0.236743	-1.34614	-0.175868	1.04965	-0.990062	0.669658	-1.74866	0.592533	1.67875	0.588676	0.69523	0.53081	0.397001	0.420539	0.860598	1.05682	0.694893	0.553496	0.605721	1.43211	0.554981	0.967522	-0.751789	0.550956	0.474559
LB-CRC-22-P-02	LB-CRC-22	CRC	III	6	no	0	post_surgery_1		0.191839	0.190937	0.843955	0.509637	0.131298	3.45569e-08	3.88154	0.376422	0.952637	1.4611	-0.00151571	-1.47232	0.150856	0.82916	0.667346	-1.82138	0.36008	-1.318	-0.160671	1.08521	-0.961914	0.670386	-1.7282	0.498179	1.87554	0.604229	0.681339	0.369269	0.122085	0.16162	0.827887	1.15853	0.738357	0.534871	0.568711	1.5633	0.620544	1.01074	-0.729246	0.528307	0.528481
LB-CRC-25-P-02	LB-CRC-25	CRC	III	20	no	1	post_surgery_1	therapy	0.251137	0.238718	0.793069	0.440887	0.139105	0.000370383	3.16945	0.569618	1.35699	1.80537	0.00212834	-1.46014	0.204224	0.799479	0.646905	-1.86351	0.21193	-1.28119	-0.0300814	1.09683	-0.979719	0.605629	-1.75571	0.559166	1.7046	0.575257	0.665005	0.514159	0.250724	0.269608	0.775358	1.0228	0.682531	0.543036	0.572479	1.42635	0.580765	0.86825	-0.753071	0.534569	0.518207
LB-CRC-27-P-01	LB-CRC-27	CRC	IV	-1	yes	0	baseline	diagnosis	0.260915	0.236279	0.745781	0.426481	0.155077	0.00428946	2.75013	0.611786	1.4542	1.68249	0.00506882	-1.43023	0.307452	0.717865	0.583188	-1.88957	0.135238	-1.41899	-0.197214	0.929535	-1.06492	0.613001	-1.78295	0.581847	1.56092	0.568829	0.615118	0.477452	0.369176	0.397407	0.721339	0.896779	0.656789	0.565482	0.565042	1.2365	0.496246	0.795656	-0.796307	0.570889	0.473527
LB-CRC-27-P-02	LB-CRC-27	CRC	IV	7	no	0	post_surgery_1	therapy	0.125128	0.12479	0.812676	0.547076	0.17315	1.29e-07	3.15955	0.228722	0.583504	0.722658	-0.00171001	-1.49343	-0.0204085	0.886049	0.561248	-1.7818	0.539676	-1.28146	-0.0262912	1.28218	-0.94504	0.513357	-1.68738	0.345438	2.17318	0.495765	0.66445	0.211834	-0.0634248	-0.00447606	0.876638	1.19509	0.705073	0.357534	0.438385	1.79158	0.733757	0.944897	-0.63137	0.395204	0.522453
LB-CRC-28-P-01	LB-CRC-28	CRC	I	-2	yes	0	baseline	diagnosis	0.0814293	0.0813526	0.690615	0.506424	0.290529	8.84242e-08	1.74311	0.160793	0.495906	0.28028	-0.000402979	-1.35851	0.466287	0.675716	0.678181	-1.89253	0.0826987	-1.30733	-0.282373	0.800802	-1.07402	0.711858	-1.7946	0.782509	1.32082	0.60779	0.62241	0.616961	0.614349	0.671245	0.672725	0.803975	0.682693	0.691497	0.672759	1.07942	0.43827	0.808136	-0.832304	0.681637	0.484135
LB-CRC-28-P-02	LB-CRC-28	CRC	I	7	no	0	post_surgery_1	remission	0.130827	0.130609	0.859117	0.571372	0.132715	6.58762e-08	4.30525	0.22897	0.573943	0.985773	-0.0019446	-1.46993	0.0907899	0.858443	0.678306	-1.80469	0.428518	-1.18013	-0.0786525	1.13953	-0.966566	0.676825	-1.72905	0.530814	1.97	0.583628	0.673453	0.380283	0.0959904	0.167248	0.849724	1.22007	0.731145	0.464218	0.567095	1.58947	0.600975	1.02509	-0.721713	0.492341	0.484951
LB-CRC-29-P-01	LB-CRC-29	CRC	III	-2	yes	1	baseline	diagnosis	0.191598	0.185939	0.801088	0.493019	0.156859	4.87e-08	3.14306	0.388621	0.995276	1.22146	0.00128385	-1.44209	0.215821	0.798031	0.660697	-1.82944	0.329679	-1.38784	-0.0970302	1.13386	-0.963903	0.662589	-1.72626	0.58684	1.77886	0.581863	0.662293	0.452532	0.244722	0.325311	0.826615	1.08494	0.704541	0.535775	0.605907	1.49965	0.552639	0.964036	-0.708056	0.537092	0.506489
LB-CRC-29-P-08	LB-CRC-29	Healthy_control	III	426	no	0	post_chemo_1	remission	0.11337	0.11298	0.748482	0.514311	0.230356	1.02e-07	2.23268	0.220431	0.624157	0.492152	-0.000944402	-1.47786	-0.00109626	0.866283	0.574861	-1.78546	0.60983	-1.33088	-0.0499617	1.3041	-0.961745	0.521255	-1.68916	0.355295	2.20158	0.488406	0.668573	0.218478	-0.0126775	0.0810524	0.886382	1.23736	0.670289	0.379124	0.469763	1.81817	0.730952	0.966811	-0.643258	0.423765	0.526094
LB-CRC-29-P-09	LB-CRC-29	Healthy_control	III	544	no	0	post_chemo_1	remission	0.108669	0.108589	0.771988	0.538101	0.212153	7.8e-08	2.53638	0.201949	0.567007	0.512219	-0.00109284	-1.42239	0.309969	0.7597	0.653828	-1.85999	0.245278	-1.44518	-0.159659	1.00615	-1.02891	0.641216	-1.76362	0.623252	1.66256	0.624623	0.685541	0.507853	0.374051	0.446485	0.765231	0.965672	0.694256	0.613269	0.6244	1.32856	0.537917	0.893583	-0.764248	0.603319	0.509763
LB-CRC-31-P-02	LB-CRC-31	CRC	II	5	no	0	post_surgery_1	remission	0.143548	0.143465	0.875137	0.560966	0.115274	2.47128e-08	4.86638	0.255894	0.611845	1.24528	-0.00245269	-1.37453	0.42605	0.725959	0.68034	-1.87829	0.0394661	-1.38723	-0.24329	0.852449	-1.07362	0.65052	-1.77739	0.681463	1.44122	0.656127	0.674599	0.575526	0.536938	0.54059	0.717621	0.811291	0.710566	0.691068	0.679402	1.13833	0.463837	0.843	-0.79266	0.691358	0.529531
LB-CRC-31-P-01	LB-CRC-31	CRC	II	0	yes	0	baseline	diagnosis	0.12165	0.121549	0.757329	0.51024	0.223047	1.22801e-07	2.28759	0.238417	0.678211	0.545399	-0.000459488	-1.45705	0.201886	0.80535	0.649712	-1.85219	0.296053	-1.29676	-0.134045	1.06996	-1.00659	0.648573	-1.73174	0.628777	1.77453	0.631984	0.700436	0.444855	0.220198	0.286242	0.78763	1.04275	0.737725	0.564405	0.620864	1.48458	0.584443	0.954393	-0.715921	0.573578	0.562762
LB-CRC-32-P-01	LB-CRC-32	CRC	IV	0	yes	1	baseline	diagnosis	0.415571	0.393078	0.772174	0.318916	0.0934423	0.00508057	3.41297	1.30307	3.19415	4.44736	0.00916207	-1.51456	-0.423858	-0.0310008	-0.19698	-1.78732	-0.371645	0.128746	2.66399	0.929136	-1.11594	-0.230282	-1.71924	-0.220495	0.545359	-0.235404	0.323236	2.64712	0.658822	-0.404435	-0.102576	0.0609631	-0.146117	-0.237773	-0.226042	0.404757	-0.163218	-0.0321918	-1.05612	-0.432971	-0.30783
LB-CRC-32-P-02	LB-CRC-32	CRC	IV	5	yes	1	pal_chemo	therapy	0.421924	0.38548	0.761274	0.328012	0.0859607	0.00579366	3.81583	1.28631	2.9627	4.90834	0.00767632	-1.56578	-0.428085	0.0558616	-0.144558	-1.83427	-0.251992	-0.0218772	2.4866	1.05073	-1.12024	-0.167443	-1.75876	-0.200543	0.792671	-0.176235	0.364292	2.38145	0.548172	-0.39108	0.0410517	0.217507	-0.0527216	-0.225433	-0.179759	0.626695	-0.0478004	0.092755	-1.02617	-0.37927	-0.234791
LB-CRC-32-P-03	LB-CRC-32	CRC	IV	20	yes	1	pal_chemo	therapy	0.424035	0.396624	0.784354	0.322442	0.0835833	0.0033903	3.85773	1.31507	3.09193	5.0732	0.00795712	-1.55681	-0.717773	0.25298	-0.171343	-1.67525	0.126536	0.134298	2.81617	1.53582	-0.962039	-0.272239	-1.58829	-0.403494	1.34328	-0.284218	0.393342	1.59403	-0.137346	-0.733719	0.195864	0.545772	-0.0382308	-0.446883	-0.345393	1.16453	0.232742	0.210301	-0.814966	-0.524221	-0.185562
LB-CRC-32-P-04	LB-CRC-32	CRC	IV	34	yes	1	pal_chemo	therapy	0.410947	0.359181	0.741325	0.335356	0.0833999	0.00677838	4.02106	1.22541	2.61209	4.92743	0.00808554	-1.54201	-0.200441	0.767674	0.433199	-1.81035	0.457644	-0.946573	0.775425	1.46334	-0.924789	0.387225	-1.72708	0.227534	2.00193	0.333255	0.644267	0.736735	-0.00797571	-0.155974	0.783237	1.20867	0.539469	0.143815	0.311841	1.76177	0.580088	0.888674	-0.707385	0.121114	0.309329
LB-CRC-32-P-08	LB-CRC-32	CRC	IV	104	yes	0	pal_chemo	therapy	0.282706	0.258611	0.764429	0.421443	0.138195	0.0023384	3.04963	0.670805	1.60696	2.0457	0.00608071	-1.44092	0.277491	0.805174	0.659287	-1.87882	0.219434	-1.40275	-0.0548829	1.13579	-0.972937	0.596138	-1.77243	0.611602	1.67952	0.606208	0.675051	0.555647	0.354673	0.378814	0.825779	1.06086	0.692717	0.538478	0.57072	1.46642	0.572254	0.925664	-0.74467	0.518023	0.466632
LB-CRC-32-P-09	LB-CRC-32	CRC	IV	132	yes	0	pal_chemo	therapy	0.323063	0.30002	0.801484	0.40507	0.100409	0.000980368	4.03421	0.797548	1.84563	3.21748	0.00715509	-1.43425	0.223592	0.840317	0.650886	-1.85737	0.321229	-1.40364	-0.0687572	1.18508	-0.953058	0.615462	-1.75323	0.571955	1.79455	0.570996	0.674252	0.511915	0.333051	0.382352	0.895798	1.16774	0.709983	0.463807	0.582636	1.58131	0.590006	0.973572	-0.719078	0.471037	0.472895
LB-CRC-32-P-10	LB-CRC-32	CRC	IV	174	yes	1	pal_chemo	therapy	0.251168	0.23749	0.788244	0.447187	0.139076	0.000787187	3.21542	0.561663	1.37725	1.80598	0.00478447	-1.41581	0.359813	0.789364	0.641933	-1.88838	0.213843	-1.45037	-0.126549	1.07886	-0.99876	0.596828	-1.77973	0.6387	1.60884	0.619313	0.68122	0.543579	0.433178	0.453753	0.774024	1.02025	0.693995	0.567695	0.585121	1.41955	0.565845	0.860884	-0.757694	0.541293	0.453463
LB-CRC-32-P-11	LB-CRC-32	CRC	IV	188	yes	0	pal_chemo	partial_remission	0.237171	0.221721	0.769692	0.447059	0.152117	0.00400577	2.93892	0.530513	1.29748	1.55914	0.0041461	-1.4319	0.31798	0.814053	0.655327	-1.87722	0.236254	-1.44432	-0.137253	1.06492	-1.01459	0.611097	-1.7798	0.638286	1.63645	0.610556	0.672059	0.545081	0.383271	0.425257	0.803282	1.03589	0.716029	0.54839	0.617093	1.4367	0.57138	0.909214	-0.747926	0.517067	0.494231
LB-CRC-32-P-12	LB-CRC-32	CRC	IV	195	yes	1	pal_chemo	partial_remission	0.24802	0.231127	0.778275	0.4481	0.142253	0.00168785	3.15003	0.553493	1.34037	1.74352	0.00427142	-1.40662	0.357924	0.785393	0.650737	-1.88337	0.201182	-1.45072	-0.134804	1.0406	-0.999609	0.617781	-1.78085	0.641511	1.58832	0.624297	0.671343	0.54194	0.425926	0.447573	0.813385	1.0181	0.698899	0.587907	0.611391	1.36565	0.521909	0.845065	-0.768959	0.550409	0.446359
LB-CRC-32-P-15	LB-CRC-32	CRC	IV	265	yes	1	pal_chemo	partial_remission	0.228202	0.212853	0.785013	0.468788	0.145105	0.000582679	3.23068	0.486791	1.1813	1.57267	0.00268349	-1.4584	0.0858383	0.876299	0.641093	-1.82963	0.474065	-1.36655	-0.0586422	1.28462	-0.954673	0.557095	-1.72761	0.486059	2.02031	0.543298	0.686168	0.314567	0.087329	0.146776	0.858238	1.22975	0.708481	0.424482	0.51927	1.74317	0.681987	0.969832	-0.673441	0.40875	0.472144
LB-CRC-32-P-16	LB-CRC-32	CRC	IV	279	yes	0	pal_chemo	partial_remission	0.227403	0.212249	0.794416	0.469804	0.137153	0.00121563	3.42541	0.484037	1.16002	1.65802	0.00167307	-1.46773	0.105812	0.85157	0.617857	-1.83546	0.455918	-1.38061	-0.0286744	1.27359	-0.957016	0.574995	-1.74303	0.484463	2.01678	0.526938	0.70076	0.368419	0.168823	0.194916	0.898822	1.23212	0.680592	0.412639	0.509849	1.77661	0.668483	0.928604	-0.684971	0.445781	0.480534
LB-CRC-32-P-17	LB-CRC-32	CRC	IV	258	yes	0	pal_chemo	partial_remission	0.149223	0.148983	0.810337	0.522373	0.168827	1.95e-08	3.09413	0.285664	0.742298	0.883881	-0.000387288	-1.46372	-0.026694	0.882004	0.583591	-1.80258	0.635363	-1.33189	-0.00544854	1.33742	-0.954539	0.49138	-1.68909	0.338324	2.21823	0.487298	0.670598	0.210292	-0.0216091	0.0125186	0.903472	1.30147	0.674384	0.338181	0.432694	1.93824	0.756073	1.00134	-0.621099	0.391603	0.520582
LB-CRC-32-P-18	LB-CRC-32	CRC	IV	272	yes	0	pal_chemo	partial_remission	0.155111	0.154531	0.831168	0.535288	0.148359	1.45e-07	3.60807	0.28977	0.742319	1.04551	-0.000596215	-1.46403	0.169973	0.81992	0.603133	-1.86963	0.474617	-1.41123	-0.111873	1.22583	-0.982665	0.505876	-1.75696	0.432982	2.02874	0.544868	0.677458	0.372681	0.202967	0.220152	0.88763	1.168	0.731466	0.478683	0.483496	1.71433	0.681186	0.926175	-0.716842	0.460607	0.481055
LB-CRC-32-P-19	LB-CRC-32	CRC	IV	286	yes	0	pal_chemo	partial_remission	0.144772	0.144672	0.819228	0.534922	0.162328	6.68e-08	3.29531	0.270641	0.712721	0.891846	-0.000576591	-1.42922	0.216008	0.80276	0.627716	-1.86449	0.360155	-1.42948	-0.0964507	1.12199	-0.995016	0.625072	-1.75458	0.534568	1.85543	0.575968	0.667078	0.444806	0.301392	0.330276	0.861341	1.14114	0.699034	0.475297	0.554906	1.58625	0.597498	0.979865	-0.736395	0.516032	0.486357
LB-CRC-32-P-20	LB-CRC-32	CRC	IV	301	yes	0	pal_chemo	partial_remission	0.190587	0.190168	0.856049	0.516629	0.120682	6.5e-08	4.28092	0.368904	0.926304	1.57925	0.000544184	-1.44839	0.166594	0.824879	0.63269	-1.84758	0.405634	-1.40765	-0.06935	1.1707	-0.970082	0.60158	-1.75341	0.507338	1.91167	0.576075	0.701383	0.454342	0.220037	0.290096	0.914924	1.19343	0.707341	0.444905	0.538051	1.6532	0.598724	0.998215	-0.707611	0.466778	0.460141
LB-CRC-32-P-21	LB-CRC-32	CRC	IV	314	yes	0	pal_chemo	partial_remission	0.187505	0.186795	0.844169	0.511011	0.131566	8.14e-08	3.88406	0.36693	0.938148	1.42518	0.000383872	-1.46699	-0.0112496	0.876929	0.590564	-1.79325	0.617069	-1.34079	0.0050083	1.34109	-0.924865	0.520485	-1.70267	0.374058	2.21473	0.470555	0.668356	0.243659	-0.00205667	0.0392489	0.957174	1.3132	0.674442	0.311254	0.439447	1.92253	0.737284	1.01512	-0.640612	0.388738	0.474472
LB-CRC-32-P-22	LB-CRC-32	CRC	IV	328	yes	0	pal_chemo	stable_disease	0.209557	0.208186	0.850864	0.496709	0.119634	5.23e-08	4.15189	0.42189	1.06312	1.75164	0.0011572	-1.4568	0.141314	0.85725	0.626828	-1.83305	0.42335	-1.39956	-0.0497085	1.20524	-0.953096	0.62499	-1.75798	0.496582	1.95979	0.561503	0.68229	0.403792	0.189672	0.228946	0.908043	1.2114	0.694038	0.434684	0.523361	1.70939	0.639332	1.007	-0.694857	0.468931	0.473743
LB-CRC-32-P-23	LB-CRC-32	CRC	IV	342	yes	0	pal_chemo	stable_disease	0.185965	0.18546	0.841731	0.509628	0.134441	3.58e-08	3.79071	0.364904	0.922815	1.38325	0.000526708	-1.45877	0.137411	0.848772	0.615911	-1.84409	0.438833	-1.38842	-0.050712	1.20284	-0.964206	0.606457	-1.73744	0.483549	1.96856	0.536878	0.657848	0.42529	0.156529	0.205212	0.898527	1.24343	0.706455	0.449995	0.534087	1.70112	0.629198	1.02273	-0.698017	0.461007	0.484157
LB-CRC-32-P-24	LB-CRC-32	CRC	IV	370	yes	0	pal_chemo	stable_disease	0.188115	0.186938	0.836918	0.505354	0.136895	1.78e-07	3.69155	0.372245	0.949266	1.37416	0.000430655	-1.48533	-0.114352	0.883069	0.55384	-1.76605	0.701578	-1.30774	0.0730051	1.40041	-0.900624	0.481219	-1.65713	0.292419	2.32451	0.432739	0.675792	0.214167	-0.11525	-0.0702432	0.955575	1.37553	0.663911	0.242998	0.400033	2.03073	0.75649	1.03205	-0.594592	0.314287	0.482858
LB-CRC-32-P-25	LB-CRC-32	CRC	IV	398	yes	0	pal_chemo	stable_disease	0.221742	0.22018	0.852647	0.488739	0.115518	4.94e-08	4.23084	0.453701	1.12784	1.91954	0.0018991	-1.48394	0.1083	0.828419	0.585892	-1.8741	0.39038	-1.32566	0.0641377	1.22285	-0.950402	0.584053	-1.74937	0.511742	1.86172	0.556122	0.704252	0.520447	0.181373	0.203421	0.857136	1.17639	0.699938	0.425545	0.524967	1.63875	0.611772	0.943446	-0.74554	0.415712	0.439269
LB-CRC-32-P-26	LB-CRC-32	CRC	IV	414	yes	0	pal_chemo	stable_disease	0.195412	0.194703	0.844414	0.504447	0.130075	4.51e-08	3.87814	0.387379	0.990563	1.50231	0.000811098	-1.49116	0.0720953	0.801685	0.581048	-1.85076	0.420385	-1.31922	0.0709146	1.22136	-0.977897	0.579451	-1.74548	0.483271	1.94659	0.534678	0.707647	0.498816	0.133591	0.166329	0.886605	1.20965	0.702968	0.44848	0.523943	1.67537	0.605162	1.00784	-0.713846	0.420357	0.461406
LB-CRC-32-P-27	LB-CRC-32	CRC	IV	482	yes	0	pal_chemo	stable_disease	0.271636	0.263285	0.820529	0.436869	0.120953	1.23e-07	3.61189	0.62178	1.54523	2.2458	0.00188846	-1.53904	-0.308629	0.605302	0.178646	-1.86075	0.583727	-0.91745	0.879491	1.52343	-0.956913	0.171665	-1.71672	0.0754273	2.14155	0.174104	0.580096	0.66815	0.0333392	-0.196198	0.775631	1.10131	0.39782	0.0292346	0.112116	1.92067	0.697891	0.695662	-0.698971	0.0201939	0.267425
LB-CRC-32-P-28	LB-CRC-32	CRC	IV	495	yes	0	pal_chemo	progressive_disease	0.236845	0.234762	0.846693	0.470404	0.117038	1.05e-07	4.01923	0.503494	1.2617	2.02366	0.0016757	-1.54046	-0.0355099	0.596212	0.383318	-1.9211	0.360663	-1.09377	0.562042	1.19274	-1.03986	0.437071	-1.80335	0.334814	1.84496	0.391293	0.611197	0.849282	0.264258	0.0578933	0.712309	1.01435	0.546596	0.30377	0.379702	1.57282	0.503912	0.810485	-0.788964	0.281442	0.341006
LB-CRC-33-P-01	LB-CRC-33	CRC	I	0	yes	0	baseline	diagnosis	0.108938	0.108788	0.729732	0.50525	0.247136	7.23892e-08	2.04442	0.215613	0.626312	0.440803	-0.000228924	-1.45958	0.188806	0.765014	0.630305	-1.88828	0.338923	-1.44612	-0.124417	1.06421	-1.0138	0.690176	-1.75628	0.578472	1.80457	0.569481	0.695929	0.464118	0.317425	0.375912	0.845507	1.07593	0.723644	0.510179	0.619228	1.51289	0.577617	0.967466	-0.735484	0.548773	0.547132
LB-CRC-34-P-01	LB-CRC-34	CRC	IV	0	yes	0	baseline	diagnosis	0.339908	0.309298	0.75285	0.372115	0.10596	0.0176288	3.51184	0.913449	2.08747	3.20789	0.00194641	-1.32712	-0.0508685	0.440899	0.0577618	-1.64993	-0.411009	-0.907873	0.30903	1.20617	-0.823526	0.35792	-1.44508	0.303299	0.462499	0.367	0.441687	0.239678	-0.00105801	0.00456344	0.498785	0.708411	0.463133	0.295689	0.329792	0.308678	0.350008	0.575662	-0.669168	0.58751	1.48778
LB-CRC-34-P-02	LB-CRC-34	CRC	IV	14	yes	0	pal_chemo	therapy	0.289334	0.282896	0.826412	0.424419	0.109971	4.01e-08	3.85938	0.681718	1.6648	2.63101	-0.000782333	-1.33934	-0.0775595	0.4143	-0.0629294	-1.68965	-0.407717	-0.947999	0.24847	1.21519	-0.804103	0.363678	-1.44737	0.290804	0.502458	0.363078	0.458152	0.194302	-0.0237164	0.00709407	0.52653	0.734532	0.511097	0.286386	0.339332	0.312608	0.385332	0.600065	-0.665566	0.603921	1.51322
LB-CRC-34-P-03	LB-CRC-34	CRC	IV	28	yes	0	pal_chemo	therapy	0.198812	0.193902	0.835023	0.504	0.127836	8.24e-08	3.94254	0.394467	0.971899	1.5552	-0.00113989	-1.47832	-0.171028	0.887983	0.466921	-1.6981	0.663766	-1.24449	0.0455126	1.47388	-0.866339	0.403077	-1.6001	0.242726	2.34345	0.367194	0.653318	0.0803749	-0.181501	-0.165089	0.936815	1.30408	0.641707	0.190315	0.323597	2.02373	0.880663	0.931282	-0.581171	0.26303	0.521615
LB-CRC-34-P-04	LB-CRC-34	CRC	IV	56	yes	0	pal_chemo	therapy	0.153032	0.152826	0.809666	0.526218	0.168449	3.84e-08	3.1239	0.290814	0.792431	0.908476	-9.02e-05	-1.42823	0.281977	0.783071	0.690898	-1.83041	0.20957	-1.44517	-0.191474	0.97176	-0.999772	0.680985	-1.74828	0.656749	1.63469	0.639657	0.685777	0.491874	0.36563	0.390303	0.824768	0.985027	0.704843	0.574519	0.640326	1.33633	0.548234	0.908236	-0.759078	0.582089	0.54059
LB-CRC-34-P-05	LB-CRC-34	CRC	IV	112	yes	0	pal_chemo	partial_remission	0.165372	0.164238	0.800811	0.509358	0.172578	5.6e-08	2.95146	0.324667	0.892696	0.958241	0.00010537	-1.48606	0.0873739	0.848079	0.71897	-1.77324	0.35957	-1.35961	-0.112949	1.12117	-0.956903	0.676951	-1.71968	0.578624	1.87951	0.606543	0.714141	0.390332	0.0776261	0.146983	0.858817	1.17726	0.76201	0.507891	0.5999	1.55355	0.652017	1.01884	-0.684611	0.510508	0.550304
LB-CRC-34-P-06	LB-CRC-34	CRC	IV	140	yes	0	pal_chemo	partial_remission	0.147141	0.146879	0.776486	0.507766	0.198417	7.21e-08	2.55909	0.28978	0.824731	0.741574	-0.000134249	-1.39933	0.359253	0.746321	0.669334	-1.8492	0.139124	-1.45509	-0.206409	0.94067	-1.02781	0.664936	-1.75818	0.672976	1.49765	0.63935	0.68696	0.544204	0.449862	0.473783	0.779624	0.916316	0.706634	0.637117	0.668837	1.22924	0.514587	0.871816	-0.774389	0.600077	0.527219
LB-CRC-34-P-07	LB-CRC-34	CRC	IV	151	yes	0	pal_chemo	partial_remission	0.109147	0.109065	0.737855	0.511999	0.242794	9.52e-08	2.10878	0.213179	0.641986	0.449548	-0.000887888	-1.40538	0.336749	0.742151	0.705424	-1.83076	0.139137	-1.46172	-0.219527	0.871875	-1.04813	0.685012	-1.76954	0.677048	1.47787	0.664115	0.712717	0.572762	0.427027	0.468649	0.713256	0.907223	0.726252	0.658162	0.668542	1.19463	0.492653	0.902356	-0.79697	0.629861	0.543873
LB-CRC-34-P-08	LB-CRC-34	CRC	IV	167	yes	0	pal_chemo	partial_remission	0.102057	0.101915	0.707354	0.500205	0.268781	1.04e-07	1.86101	0.20403	0.634461	0.379703	-0.00116977	-1.3782	0.424592	0.714057	0.713951	-1.83797	0.0317933	-1.47373	-0.292986	0.764958	-1.07569	0.698404	-1.76216	0.757263	1.32224	0.689208	0.668114	0.588683	0.497867	0.54172	0.671775	0.780025	0.722972	0.726482	0.710861	1.03267	0.474016	0.825711	-0.829071	0.693807	0.530486
LB-CRC-34-P-09	LB-CRC-34	CRC	IV	210	yes	0	post_chemo_1	stable_disease	0.210106	0.208448	0.81088	0.475085	0.153994	9.14e-09	3.08509	0.442248	1.18027	1.36438	-0.000211263	-1.44824	0.113047	0.465723	0.268559	-1.87643	-0.145211	-1.31508	-0.0775805	1.0314	-0.958835	0.571243	-1.67338	0.571884	1.04209	0.574301	0.623674	0.454832	0.311857	0.321307	0.690635	0.869558	0.642969	0.554147	0.586265	0.79918	0.469596	0.776736	-0.756734	0.72549	1.02418
LB-CRC-34-P-10	LB-CRC-34	CRC	IV	231	yes	0	post_chemo_1	stable_disease	0.259158	0.255989	0.823524	0.44375	0.12563	5.86e-08	3.53219	0.584018	1.48749	2.06286	-0.000306428	-1.41032	-0.0522827	0.419313	0.0759725	-1.75289	-0.284907	-1.09654	0.128601	1.14633	-0.852053	0.45219	-1.52778	0.423071	0.729389	0.451453	0.513171	0.288957	0.0839425	0.0996684	0.613663	0.844425	0.56854	0.410016	0.450479	0.506509	0.450954	0.698341	-0.685666	0.663542	1.36382
LB-CRC-34-P-11	LB-CRC-34	CRC	IV	245	yes	0	chemo_2	stable_disease	0.131984	0.130828	0.765543	0.513671	0.211334	1.63e-07	2.43061	0.256942	0.72326	0.624526	-0.000783789	-1.48282	0.0475594	0.846262	0.577265	-1.81878	0.480285	-1.36081	-0.071658	1.27858	-0.957278	0.504548	-1.70323	0.369774	2.05747	0.455935	0.648798	0.238109	0.0250808	0.0105556	0.868087	1.16351	0.668407	0.404386	0.428411	1.74976	0.778834	0.918778	-0.676341	0.475928	0.617268
LB-CRC-34-P-12	LB-CRC-34	CRC	IV	259	yes	0	chemo_2	stable_disease	0.152668	0.14956	0.758769	0.496401	0.207675	1.51e-07	2.39028	0.30755	0.870086	0.73513	-0.000963106	-1.48556	-0.250122	0.8821	0.391528	-1.67419	0.773059	-1.18244	0.0982355	1.52448	-0.847859	0.325721	-1.55575	0.118535	2.36072	0.291553	0.615459	0.00964882	-0.288926	-0.246726	0.915759	1.31559	0.591103	0.0991729	0.25549	2.08053	0.919332	0.935537	-0.504055	0.275057	0.648055
LB-CRC-34-P-13	LB-CRC-34	CRC	IV	273	yes	0	chemo_2	stable_disease	0.15476	0.154516	0.798445	0.516486	0.178435	1.8e-08	2.89453	0.29964	0.824462	0.867319	-1.52e-05	-1.40319	0.372876	0.686713	0.621302	-1.86643	0.0642057	-1.45059	-0.190392	0.954724	-1.02714	0.608467	-1.7669	0.63947	1.37274	0.614489	0.62519	0.554851	0.479718	0.41859	0.74649	0.87746	0.666222	0.618694	0.629842	1.10763	0.471463	0.835901	-0.807722	0.686252	0.67946
LB-CRC-34-P-14	LB-CRC-34	CRC	IV	287	yes	0	chemo_2	progressive_disease	0.126042	0.125627	0.712469	0.479699	0.259008	0.00016108	1.85206	0.262752	0.795999	0.486632	-3.71e-05	-1.37199	0.414266	0.671935	0.661659	-1.86562	0.0329143	-1.45503	-0.225887	0.861174	-1.05052	0.690353	-1.76929	0.694478	1.32673	0.636533	0.666013	0.578514	0.522524	0.518826	0.731658	0.831494	0.681107	0.682121	0.652965	1.04276	0.455064	0.835636	-0.82258	0.70977	0.615846
LB-CRC-34-P-15	LB-CRC-34	CRC	IV	315	yes	0	chemo_3	progressive_disease	0.135807	0.135263	0.736624	0.489061	0.234823	2.07e-08	2.08268	0.277689	0.829639	0.578336	-0.000524051	-1.4479	0.173302	0.737487	0.561708	-1.8391	0.170636	-1.35065	-0.0624692	1.11259	-0.980742	0.59551	-1.72962	0.521111	1.51504	0.578237	0.652291	0.421015	0.192021	0.23173	0.782731	1.01904	0.707413	0.539353	0.575257	1.22398	0.580584	0.89264	-0.741847	0.637559	0.877935
LB-CRC-35-P-01	LB-CRC-35	CRC	III	0	yes	0	baseline	diagnosis	0.262901	0.243229	0.714309	0.399181	0.183641	0.00826273	2.1737	0.658601	1.72628	1.4316	0.00389048	-1.39892	0.341542	0.727551	0.6143	-1.83401	0.0781259	-1.30399	-0.06385	1.0133	-0.982232	0.609227	-1.71047	0.594054	1.45706	0.624399	0.66003	0.546614	0.403412	0.425645	0.738547	0.901192	0.6987	0.606205	0.583803	1.22774	0.528453	0.802778	-0.72749	0.567612	0.495062
LB-CRC-35-P-02	LB-CRC-35	CRC	III	146	no	0	post_surgery_1	therapy	0.124843	0.12454	0.723839	0.486828	0.249874	8.89e-08	1.94829	0.256442	0.751777	0.499623	-0.000463921	-1.33753	0.538669	0.655199	0.664082	-1.87299	-0.0253189	-1.40699	-0.273059	0.78128	-1.07348	0.663307	-1.78677	0.725478	1.28019	0.677214	0.633153	0.613397	0.627244	0.654507	0.645089	0.733439	0.679045	0.766698	0.665668	1.03197	0.405762	0.778557	-0.824774	0.715953	0.479723
LB-CRC-35-P-03	LB-CRC-35	CRC	III	192	no	0	chemo_2	therapy	0.16695	0.163546	0.737942	0.467314	0.225676	5.71e-05	2.07073	0.357253	1.03425	0.739775	0.000500236	-1.48402	0.111913	0.879434	0.663604	-1.83314	0.32791	-1.3377	-0.0981729	1.19345	-0.952261	0.59134	-1.75203	0.538888	1.88834	0.566957	0.705591	0.391439	0.128197	0.24514	0.84289	1.09472	0.766137	0.529182	0.634621	1.57343	0.69609	0.956644	-0.622889	0.536974	0.65202
LB-CRC-35-P-04	LB-CRC-35	CRC	III	226	no	0	chemo_2	therapy	0.121936	0.121428	0.704834	0.475003	0.267953	0.000258973	1.77271	0.256706	0.775282	0.455065	-0.000271096	-1.49048	0.0750604	0.862823	0.633287	-1.80688	0.421583	-1.27554	-0.0538336	1.19386	-0.954563	0.606196	-1.72084	0.493189	1.95113	0.57927	0.6968	0.336753	0.028736	0.0959352	0.829634	1.13563	0.75846	0.487626	0.556955	1.62995	0.674585	0.968134	-0.637552	0.481215	0.581334
LB-CRC-35-P-05	LB-CRC-35	Healthy_control	III	325	no	0	post_chemo_2	remission	0.130881	0.13027	0.701076	0.460862	0.268854	0.000581864	1.71417	0.283992	0.857127	0.486812	1.89e-05	-1.39582	0.423464	0.696131	0.676029	-1.86785	0.0800811	-1.38216	-0.217356	0.861732	-1.07023	0.664041	-1.80046	0.688642	1.42285	0.656379	0.644777	0.57	0.472108	0.508879	0.675729	0.816741	0.688293	0.727216	0.645769	1.14961	0.455478	0.828729	-0.813919	0.685549	0.497659
LB-CRC-35-P-06	LB-CRC-35	Healthy_control	III	329	no	0	post_chemo_2	remission	0.145161	0.144422	0.723869	0.466572	0.246554	7.51e-05	1.89237	0.311122	0.926387	0.588759	0.000394921	-1.37385	0.44292	0.708019	0.681633	-1.87755	0.0797571	-1.39923	-0.224753	0.864592	-1.06402	0.673566	-1.79162	0.658013	1.40703	0.643988	0.642548	0.568822	0.502448	0.517155	0.697259	0.811183	0.665257	0.711902	0.649145	1.12929	0.442655	0.816562	-0.828639	0.685894	0.505324
LB-CRC-35-P-07	LB-CRC-35	Healthy_control	III	423	no	0	post_chemo_2	remission	0.152869	0.152029	0.735839	0.47166	0.233784	2.79e-08	2.0175	0.324108	0.9561	0.653887	0.000838222	-1.37731	0.474027	0.689316	0.656692	-1.88355	0.0720644	-1.38508	-0.201405	0.879345	-1.05808	0.634551	-1.77376	0.667396	1.4575	0.642342	0.659674	0.56534	0.548988	0.568586	0.687604	0.817231	0.685627	0.69778	0.618678	1.17899	0.468616	0.826897	-0.809463	0.657139	0.490681
LB-CRC-36-P-02	LB-CRC-36	CRC	IV	6	no	0	post_surgery_1	therapy	0.193878	0.189386	0.85216	0.516767	0.11426	7.81e-08	4.52271	0.375176	0.898343	1.69681	-0.00309955	-1.37741	-0.542009	0.949211	0.287449	-1.42993	1.04049	-0.842752	0.266465	1.7029	-0.67372	0.11705	-1.31424	-0.124809	2.69014	0.122402	0.570833	-0.258546	-0.626002	-0.554299	0.91877	1.48164	0.51747	-0.161918	0.0293961	2.386	1.06709	0.893449	-0.312325	-0.0140779	0.470831
LB-CRC-36-P-01	LB-CRC-36	CRC	IV	-1	yes	0	baseline	diagnosis	0.183548	0.183153	0.847029	0.50888	0.133841	6.78e-08	3.80213	0.360691	0.899216	1.37139	-5.36e-05	-1.41727	0.323347	0.768583	0.669403	-1.88257	0.176659	-1.34993	-0.209961	1.00162	-1.03245	0.661568	-1.76433	0.63847	1.63835	0.602232	0.670833	0.549385	0.474151	0.515658	0.822496	1.04306	0.711481	0.585364	0.628778	1.37439	0.543286	0.925049	-0.788039	0.568808	0.49414
LB-CRC-38-P-01	LB-CRC-38	CRC	IV	-1	yes	1	baseline	diagnosis	0.300777	0.289515	0.863701	0.426693	0.0730146	1.08e-07	5.84394	0.704903	1.5628	4.11941	0.00254071	-1.42743	0.336978	0.772664	0.661314	-1.85241	0.138883	-1.33026	-0.149167	1.02069	-0.960552	0.691921	-1.73745	0.654131	1.5788	0.601621	0.675368	0.585065	0.437131	0.440812	0.822166	1.00601	0.702148	0.570357	0.64131	1.30315	0.494774	0.91158	-0.763464	0.557801	0.490589
LB-CRC-38-P-02	LB-CRC-38	CRC	IV	5	yes	1	post_surgery_1	therapy	0.324931	0.292629	0.816363	0.421169	0.0767543	9.78e-08	5.48723	0.771499	1.6372	4.23339	0.00349227	-1.47236	0.147872	0.78058	0.601741	-1.85542	0.301239	-1.30105	-0.106841	1.12857	-0.984216	0.620061	-1.73689	0.458627	1.83967	0.576606	0.640789	0.378749	0.158395	0.20723	0.803883	1.08277	0.697361	0.483471	0.523023	1.49818	0.60354	0.924837	-0.708792	0.48164	0.479703
LB-CRC-38-P-03	LB-CRC-38	CRC	IV	29	yes	1	post_surgery_1	therapy	0.375344	0.343582	0.81084	0.379142	0.0655201	6.17e-05	5.78665	0.989983	2.12573	5.72868	0.00688421	-1.42676	0.321777	0.849957	0.659923	-1.84708	0.106203	-1.32886	-0.104497	1.06648	-0.956577	0.642052	-1.7428	0.705577	1.55743	0.661439	0.738746	0.564044	0.384733	0.450594	0.832253	1.0709	0.755414	0.60923	0.666782	1.38382	0.554491	0.893371	-0.700781	0.520159	0.463737
LB-CRC-38-P-04	LB-CRC-38	CRC	IV	85	yes	0	pal_chemo	therapy	0.268375	0.251551	0.812488	0.441314	0.111653	1.11e-07	3.95255	0.608128	1.40302	2.40365	0.00407926	-1.44684	0.233858	0.848167	0.671691	-1.84856	0.192329	-1.32549	-0.111775	1.13827	-0.953188	0.651425	-1.72741	0.660113	1.68313	0.630287	0.728603	0.511237	0.328397	0.35305	0.80731	1.04126	0.727476	0.554754	0.610751	1.45348	0.621899	0.92045	-0.695599	0.512925	0.527661
LB-CRC-38-P-05	LB-CRC-38	CRC	IV	139	yes	0	pal_chemo	stable_disease	0.230124	0.22347	0.829744	0.473993	0.120888	1.04e-07	3.92092	0.485502	1.19009	1.90361	0.00213454	-1.45621	0.273862	0.843444	0.672697	-1.85229	0.201592	-1.32663	-0.130001	1.11633	-0.946611	0.642607	-1.72935	0.657291	1.66149	0.628892	0.703945	0.544505	0.27858	0.344635	0.794561	1.05018	0.707774	0.555942	0.619775	1.43384	0.594645	0.929028	-0.718004	0.476087	0.503913
LB-CRC-38-P-06	LB-CRC-38	CRC	IV	159	yes	0	pal_chemo	stable_disease	0.3245	0.289543	0.775873	0.405488	0.106363	0.00122225	3.81228	0.800269	1.82799	3.05085	0.00701248	-1.45817	0.215653	0.85384	0.629646	-1.86565	0.27909	-1.28077	-0.0936807	1.16891	-0.940049	0.623867	-1.73266	0.585281	1.80436	0.593892	0.718729	0.442596	0.261623	0.268314	0.826076	1.11095	0.712326	0.508504	0.573636	1.5492	0.627514	0.926406	-0.694243	0.481067	0.497081
LB-CRC-38-P-07	LB-CRC-38	CRC	IV	183	yes	1	pal_chemo	stable_disease	0.286701	0.261968	0.759616	0.41271	0.13783	0.00332123	2.99433	0.694678	1.66996	2.0801	0.0055632	-1.44153	0.251167	0.794435	0.663205	-1.85018	0.230072	-1.31633	-0.123928	1.09267	-0.964922	0.662814	-1.73728	0.612641	1.68226	0.612633	0.698001	0.50534	0.283003	0.357711	0.810672	1.07285	0.721054	0.564322	0.599451	1.43631	0.563746	0.941096	-0.727076	0.526066	0.50127
LB-CRC-38-P-08	LB-CRC-38	CRC	IV	211	yes	0	pal_chemo	stable_disease	0.250201	0.233651	0.772952	0.440042	0.146994	0.00175833	2.99359	0.568585	1.40407	1.70211	0.00390814	-1.47383	0.158164	0.851632	0.644091	-1.84255	0.383285	-1.29251	-0.0704702	1.21198	-0.95779	0.590576	-1.71831	0.494576	1.91393	0.558333	0.680157	0.374661	0.15505	0.186351	0.845469	1.1514	0.690033	0.489231	0.534617	1.62761	0.668418	0.940959	-0.689896	0.455881	0.491349
LB-CRC-38-P-09	LB-CRC-38	CRC	IV	230	yes	0	pal_chemo	stable_disease	0.130867	0.130712	0.787819	0.520099	0.194456	8.48e-08	2.67464	0.251619	0.677527	0.672988	-0.000963812	-1.42774	0.323778	0.779692	0.63332	-1.88145	0.19381	-1.35156	-0.190994	0.981123	-1.02864	0.623908	-1.76558	0.598086	1.63465	0.59805	0.680632	0.482599	0.344378	0.381561	0.773243	0.936294	0.679623	0.604826	0.602141	1.35247	0.559337	0.868416	-0.766405	0.59048	0.509602
LB-CRC-38-P-10	LB-CRC-38	CRC	IV	247	yes	0	pal_chemo	stable_disease	0.160487	0.160211	0.817226	0.51267	0.16238	7.43e-08	3.15723	0.313041	0.813684	0.988342	-0.0006853	-1.41374	0.345919	0.732924	0.643853	-1.88373	0.153457	-1.36552	-0.181256	0.966127	-1.02637	0.642751	-1.77803	0.597316	1.62187	0.599486	0.662838	0.521883	0.432752	0.450741	0.793973	0.966882	0.669969	0.608873	0.609856	1.33557	0.506227	0.866558	-0.769658	0.58493	0.480311
LB-CRC-38-P-11	LB-CRC-38	CRC	IV	288	yes	0	pal_chemo	stable_disease	0.149864	0.149529	0.780723	0.500738	0.195741	8.3e-08	2.55817	0.299286	0.824749	0.765625	-3.98e-05	-1.40264	0.359784	0.751462	0.664947	-1.86599	0.152771	-1.35641	-0.182215	0.980575	-1.01976	0.676751	-1.77899	0.630938	1.57306	0.631803	0.680973	0.554361	0.475585	0.490195	0.78639	0.944907	0.684332	0.627447	0.649863	1.30092	0.518679	0.890634	-0.770996	0.616617	0.508982
LB-CRC-38-P-12	LB-CRC-38	CRC	IV	313	yes	0	pal_chemo	stable_disease	0.15008	0.149831	0.801721	0.515568	0.1778	9.26e-08	2.89972	0.291097	0.78677	0.844099	-0.000261433	-1.41377	0.371858	0.750323	0.649054	-1.87337	0.181012	-1.34646	-0.157058	0.992498	-1.0313	0.666386	-1.76284	0.597122	1.62516	0.616707	0.684235	0.539914	0.435336	0.453258	0.79087	0.972287	0.703916	0.611224	0.60992	1.31943	0.527573	0.905232	-0.765717	0.597117	0.484905
LB-CRC-38-P-13	LB-CRC-38	CRC	IV	345	yes	0	pal_chemo	stable_disease	0.126426	0.124651	0.753299	0.508593	0.222429	1.78e-07	2.28654	0.24858	0.702695	0.568388	-0.000931808	-1.50931	-0.152816	0.871881	0.539069	-1.71665	0.690169	-1.16641	0.0298958	1.36678	-0.898248	0.518999	-1.6305	0.259058	2.33804	0.438711	0.687158	0.137527	-0.183617	-0.125768	0.913194	1.30942	0.667595	0.267435	0.430158	1.95123	0.782264	1.04775	-0.559473	0.366575	0.530886
LB-CRC-38-P-14	LB-CRC-38	CRC	IV	373	yes	0	pal_chemo	stable_disease	0.12656	0.126276	0.743308	0.497	0.233771	9.6e-08	2.12601	0.254647	0.734132	0.541383	7.31e-05	-1.40988	0.354126	0.720625	0.657762	-1.87977	0.168711	-1.36255	-0.184484	0.943352	-1.04495	0.676241	-1.76344	0.639092	1.58086	0.645586	0.67695	0.53874	0.403808	0.46375	0.751182	0.921945	0.691721	0.642885	0.646301	1.29865	0.504547	0.897793	-0.771822	0.64153	0.504588
LB-CRC-38-P-15	LB-CRC-38	CRC	IV	421	yes	0	pal_chemo	stable_disease	0.1114	0.111203	0.709232	0.486581	0.266086	8.51e-08	1.82866	0.228943	0.682377	0.418659	6.44e-05	-1.33994	0.491574	0.672555	0.670104	-1.87924	0.0701902	-1.37421	-0.246459	0.807593	-1.07593	0.692382	-1.77234	0.687532	1.39343	0.648362	0.650442	0.619758	0.603598	0.616649	0.6816	0.802159	0.677298	0.706062	0.651877	1.1048	0.418327	0.821468	-0.804585	0.689627	0.486617
LB-CRC-38-P-16	LB-CRC-38	CRC	IV	447	yes	0	pal_chemo	stable_disease	0.126554	0.126061	0.717325	0.477872	0.25606	1.44e-07	1.86625	0.264828	0.785803	0.494236	0.00036331	-1.48294	0.0212089	0.84255	0.59622	-1.81203	0.529171	-1.24761	-0.0382991	1.24942	-0.970687	0.56722	-1.70511	0.389214	2.14072	0.514213	0.708657	0.268235	0.00258883	0.0657712	0.878073	1.21573	0.703272	0.400662	0.500245	1.79694	0.703868	0.991633	-0.633993	0.441284	0.53251
LB-CRC-42-P-02	LB-CRC-42	CRC	I	5	no	0	post_surgery_1	remission	0.148769	0.148671	0.864307	0.560404	0.122602	5.1e-08	4.57092	0.265467	0.641482	1.21343	-0.00225845	-1.39873	0.31843	0.761319	0.677102	-1.84562	0.203655	-1.35118	-0.161688	0.965675	-1.01284	0.691148	-1.76245	0.651093	1.61235	0.626916	0.691937	0.537615	0.421819	0.495236	0.796269	0.945811	0.718615	0.611265	0.654069	1.29974	0.507793	0.920383	-0.780965	0.605524	0.497638
LB-CRC-42-P-03	LB-CRC-42	CRC	I	39	no	0	post_surgery_1	remission	0.138761	0.135807	0.747506	0.497897	0.22218	2.37e-07	2.24096	0.278695	0.789489	0.624544	-0.00129841	-1.44333	-0.430748	0.936469	0.425922	-1.52434	1.0267	-0.971608	0.183605	1.59192	-0.720814	0.343028	-1.43271	0.0430156	2.71393	0.251644	0.650674	-0.10085	-0.49394	-0.411452	1.01207	1.52103	0.616587	-0.0295672	0.220839	2.31679	0.934675	1.06244	-0.374354	0.130997	0.53224
LB-CRC-42-P-01	LB-CRC-42	CRC	I	-1	yes	0	baseline	diagnosis	0.124897	0.123871	0.735479	0.498018	0.240714	1.29e-07	2.06892	0.250789	0.735498	0.518861	-0.000871324	-1.48742	-0.361646	0.940958	0.497451	-1.57573	0.956983	-1.02053	0.13767	1.49924	-0.77846	0.452046	-1.49277	0.149749	2.6046	0.319722	0.673768	-0.0307597	-0.429414	-0.328475	0.973334	1.49724	0.67442	0.0889586	0.318053	2.21624	0.87034	1.10977	-0.4377	0.213603	0.554752
LB-CRC-43-P-02	LB-CRC-43	CRC	IV	26	yes	0	pal_chemo	therapy	0.281987	0.260018	0.788153	0.434422	0.122058	0.000866753	3.55916	0.649109	1.57587	2.31028	0.00636127	-1.46588	0.280352	0.813001	0.653611	-1.90122	0.27783	-1.35961	-0.137027	1.09942	-0.976782	0.650586	-1.76677	0.622006	1.6333	0.616284	0.6807	0.519562	0.317572	0.358576	0.773028	1.03877	0.696538	0.566231	0.601158	1.40778	0.569906	0.897125	-0.743875	0.540707	0.483616
LB-CRC-43-P-03	LB-CRC-43	CRC	IV	55	yes	0	pal_chemo	therapy	0.339713	0.295031	0.774934	0.400862	0.0903027	0.00108487	4.43909	0.847456	1.80768	3.76193	0.00535445	-1.46176	0.197624	0.80948	0.643626	-1.8908	0.378769	-1.33421	-0.0847106	1.16286	-0.981836	0.608631	-1.76323	0.566162	1.79712	0.580471	0.691909	0.448412	0.253039	0.282454	0.814748	1.08852	0.706773	0.504241	0.556734	1.53839	0.643777	0.926589	-0.732909	0.494884	0.528617
LB-CRC-43-P-05	LB-CRC-43	CRC	IV	110	yes	0	radiation	partial_remission	0.31519	0.278831	0.76914	0.409264	0.106308	0.00259735	3.84979	0.770137	1.70181	2.96487	0.00298966	-1.45923	0.310385	0.795786	0.674699	-1.89583	0.248545	-1.34577	-0.116825	1.03072	-1.02064	0.673373	-1.78287	0.62734	1.55296	0.598687	0.660319	0.544166	0.347879	0.404145	0.757698	1.00075	0.697547	0.596416	0.623715	1.34261	0.569127	0.888043	-0.773761	0.561665	0.490165
LB-CRC-43-P-06	LB-CRC-43	CRC	IV	160	yes	0	post_surgery_2	partial_remission	0.11471	0.11448	0.756813	0.520631	0.225233	9.36e-08	2.31152	0.220329	0.634534	0.509295	-0.00101068	-1.5238	-0.0862776	0.90581	0.630285	-1.78423	0.631956	-1.22039	-0.0198513	1.30309	-0.927005	0.62793	-1.68347	0.451536	2.11261	0.537165	0.691311	0.219997	-0.189575	-0.0864891	0.824266	1.2755	0.744907	0.390678	0.509829	1.82567	0.730419	1.04277	-0.6333	0.434607	0.551313
LB-CRC-43-P-07	LB-CRC-43	CRC	IV	201	yes	0	post_surgery_2	partial_remission	0.0929927	0.0926971	0.733671	0.529542	0.249824	6.82e-08	2.11965	0.17561	0.519394	0.372232	-0.000904177	-1.45505	0.286262	0.763641	0.638899	-1.89964	0.340051	-1.39184	-0.163531	1.02656	-1.04933	0.634839	-1.78107	0.584643	1.68556	0.580402	0.666985	0.454464	0.312212	0.377372	0.73509	0.988834	0.712035	0.585235	0.607102	1.41538	0.554539	0.901288	-0.783319	0.582869	0.50676
LB-CRC-43-P-08	LB-CRC-43	CRC	IV	278	yes	0	chemo_2	progressive_disease	0.161034	0.160602	0.794354	0.507986	0.180065	4.49e-08	2.82113	0.317004	0.879441	0.894311	0.000432832	-1.47061	0.291989	0.665049	0.586702	-1.93321	0.197912	-1.38718	-0.183207	1.01251	-1.03961	0.653364	-1.79077	0.649927	1.5091	0.607937	0.658889	0.515913	0.432256	0.471656	0.77661	0.961404	0.679508	0.620896	0.621255	1.26201	0.531976	0.878425	-0.777731	0.603011	0.50402
LB-CRC-43-P-09	LB-CRC-43	CRC	IV	313	yes	0	chemo_2	progressive_disease	0.129525	0.129278	0.779563	0.5281	0.20076	4.95e-08	2.6305	0.245266	0.686052	0.645173	-0.000173102	-1.42335	0.34959	0.749154	0.653446	-1.93334	0.275632	-1.40148	-0.208887	0.978595	-1.05395	0.633961	-1.79013	0.631881	1.61285	0.622206	0.652134	0.494829	0.403779	0.426453	0.739998	0.941622	0.685104	0.601382	0.584705	1.35121	0.545332	0.866721	-0.787068	0.5941	0.490071
LB-CRC-43-P-10	LB-CRC-43	CRC	IV	342	yes	0	chemo_2	stable_disease	0.145025	0.144879	0.793776	0.519347	0.186733	1.55e-07	2.78123	0.279245	0.752733	0.776644	0.000195237	-1.42705	0.241872	0.77757	0.679868	-1.86057	0.28017	-1.3573	-0.16709	0.983077	-1.05165	0.675953	-1.78849	0.596558	1.71115	0.652269	0.686316	0.484399	0.265253	0.341216	0.774852	1.0282	0.735301	0.590934	0.601496	1.39192	0.547647	0.961002	-0.771087	0.575585	0.473788
LB-CRC-44-P-01	LB-CRC-44	CRC	III	0	yes	0	baseline	diagnosis	0.138745	0.138596	0.791402	0.52885	0.187619	3.84341e-08	2.81875	0.262352	0.709568	0.739505	3.16441e-05	-1.42867	0.373002	0.76809	0.668782	-1.91299	0.179202	-1.39271	-0.227148	0.967814	-1.04906	0.61861	-1.80153	0.644692	1.6199	0.615889	0.658283	0.519978	0.424809	0.437741	0.706868	0.922222	0.678583	0.638929	0.590814	1.31326	0.557037	0.839843	-0.794834	0.628272	0.521906
LB-CRC-44-P-02	LB-CRC-44	CRC	III	8	no	0	post_surgery_1	remission	0.170937	0.170844	0.889098	0.565445	0.0953023	3.81515e-08	5.93316	0.302306	0.716021	1.79363	-0.00127226	-1.39698	0.439682	0.719477	0.694918	-1.9079	0.11296	-1.386	-0.231843	0.880584	-1.07392	0.661555	-1.79307	0.667802	1.51947	0.667428	0.675241	0.553336	0.484378	0.515907	0.73565	0.881849	0.704669	0.700765	0.636042	1.19928	0.488802	0.854161	-0.818492	0.645897	0.492195
LB-CRC-45-P-02	LB-CRC-45	CRC	I	6	no	0	post_surgery_1	therapy	0.156472	0.155312	0.740722	0.473674	0.226868	1.26089e-07	2.08788	0.330336	0.964758	0.689702	0.000511515	-1.36173	0.434914	0.638814	0.668015	-1.87189	0.0550561	-1.47674	-0.269138	0.783023	-1.10391	0.695089	-1.79216	0.653372	1.40442	0.65306	0.635518	0.574948	0.520647	0.545752	0.703642	0.793247	0.714356	0.743785	0.678931	1.10334	0.430419	0.85231	-0.803076	0.725243	0.498245
LB-CRC-45-P-01	LB-CRC-45	CRC	I	-5	yes	0	baseline	therapy	0.165068	0.163215	0.731458	0.462118	0.23039	5.46042e-08	2.00581	0.357198	1.06208	0.716471	0.00113225	-1.3442	0.503869	0.656932	0.642987	-1.88625	0.036889	-1.50231	-0.27101	0.769536	-1.08514	0.675108	-1.79241	0.677994	1.34395	0.634845	0.641368	0.603492	0.630816	0.631889	0.690538	0.755407	0.680475	0.748151	0.633434	1.08541	0.428152	0.808763	-0.807601	0.699224	0.506744
LB-CRC-46-P-01	LB-CRC-46	CRC	IV	-1	yes	0	baseline	therapy	0.167274	0.166096	0.756599	0.475423	0.210871	7.86e-08	2.25457	0.351842	1.0019	0.793253	0.000924817	-1.45015	0.221996	0.776733	0.700828	-1.81589	0.326373	-1.29763	-0.130774	0.98097	-0.997524	0.716303	-1.72474	0.637035	1.68805	0.630178	0.683715	0.489249	0.240075	0.330865	0.793647	1.02807	0.735878	0.546236	0.642926	1.42514	0.533822	0.971396	-0.749635	0.58041	0.537769
LB-CRC-46-P-02	LB-CRC-46	CRC	IV	9	yes	0	post_surgery_1	therapy	0.132564	0.131052	0.795395	0.533169	0.184331	1.25e-07	2.89246	0.248634	0.669335	0.719163	-0.00231965	-1.50526	-0.329526	0.983028	0.500921	-1.62223	0.868015	-1.03302	0.166708	1.53398	-0.808039	0.341505	-1.51492	0.138173	2.4004	0.345527	0.667354	-0.0213585	-0.430316	-0.33532	0.898059	1.39631	0.66236	0.116264	0.264908	2.16938	0.918892	1.01126	-0.410244	0.245758	0.550199
LB-CRC-46-P-03	LB-CRC-46	CRC	IV	35	yes	0	post_surgery_1	therapy	0.153037	0.151825	0.786843	0.509169	0.188399	8.18e-08	2.70261	0.300562	0.812035	0.812301	-0.000435213	-1.47795	-0.193132	0.840837	0.537581	-1.69547	0.768744	-1.1553	0.0496524	1.33092	-0.914719	0.484475	-1.62343	0.198468	2.40222	0.432149	0.697826	0.119899	-0.215295	-0.123457	0.945221	1.33689	0.682018	0.26433	0.333373	2.03161	0.782099	1.0454	-0.544522	0.3567	0.514152
LB-CRC-47-P-02	LB-CRC-47	CRC	III	16	no	0	post_surgery_1	therapy	0.13693	0.136835	0.802259	0.53021	0.181472	1.13e-07	2.92173	0.258256	0.69921	0.754555	-0.00074024	-1.52087	-0.04319	0.876623	0.684293	-1.73745	0.484941	-1.39983	0.0151135	1.21006	-0.888122	0.733492	-1.66265	0.508488	1.96671	0.602712	0.709665	0.272055	-0.17485	-0.0714824	0.823847	1.26682	0.804842	0.448297	0.564975	1.70113	0.653885	1.09418	-0.63876	0.470632	0.568878
LB-CRC-47-P-03	LB-CRC-47	CRC	III	28	no	0	chemo_1	therapy	0.148457	0.148273	0.795899	0.516219	0.184312	7.48e-08	2.80079	0.287584	0.781977	0.805464	0.000114684	-1.45259	0.210075	0.762387	0.694683	-1.84416	0.236128	-1.50652	-0.122278	1.00114	-0.988754	0.746615	-1.72447	0.625591	1.61457	0.632606	0.693906	0.489702	0.205337	0.271618	0.783853	1.0328	0.747744	0.599886	0.65986	1.39237	0.518485	0.97587	-0.752934	0.599717	0.528652
LB-CRC-47-P-04	LB-CRC-47	CRC	III	50	no	0	chemo_1	therapy	0.117142	0.116403	0.747316	0.518635	0.232547	1.49e-07	2.23023	0.225866	0.657903	0.503734	-0.000475952	-1.50124	-0.0456846	0.866031	0.57234	-1.79729	0.6131	-1.40862	-0.0281701	1.31425	-0.967106	0.488684	-1.66988	0.339487	2.16498	0.441792	0.637257	0.148651	-0.0887222	0.00126772	0.812717	1.18595	0.657413	0.351273	0.404425	1.92345	0.788045	0.939725	-0.622915	0.402984	0.57742
LB-CRC-47-P-05	LB-CRC-47	CRC	III	72	no	0	chemo_1	therapy	0.10789	0.107729	0.749037	0.524196	0.233808	7.48e-08	2.24199	0.205821	0.58426	0.461448	-0.000629169	-1.43077	0.305512	0.770718	0.673832	-1.8759	0.201903	-1.54254	-0.164428	0.943108	-1.0505	0.662577	-1.76979	0.649801	1.52472	0.630328	0.652642	0.45955	0.286364	0.353877	0.674337	0.908865	0.702058	0.631928	0.611913	1.33874	0.5494	0.864815	-0.786918	0.631249	0.538061
LB-CRC-47-P-01	LB-CRC-47	CRC	III	-7	yes	0	baseline	diagnosis	0.207659	0.204849	0.818851	0.480977	0.145081	5.73e-08	3.31524	0.431745	1.1207	1.43134	0.00187158	-1.47206	0.0794624	0.828649	0.648656	-1.83591	0.4049	-1.45967	-0.042942	1.21161	-0.935769	0.629837	-1.71335	0.451206	1.90952	0.555151	0.675147	0.348967	0.0939637	0.153792	0.849504	1.14969	0.717715	0.46785	0.523317	1.68306	0.633904	1.00653	-0.669609	0.489329	0.553623
LB-CRC-47-P-06	LB-CRC-47	CRC	III	83	no	0	chemo_1	therapy	0.137783	0.137467	0.769906	0.513755	0.209381	5.56e-08	2.45369	0.268188	0.758553	0.65805	0.000548814	-1.37471	0.482822	0.683446	0.659793	-1.89906	0.0380911	-1.58745	-0.229901	0.802713	-1.094	0.679103	-1.78832	0.679852	1.32075	0.621961	0.638234	0.579281	0.566607	0.610721	0.665631	0.759969	0.671657	0.711109	0.641561	1.09177	0.444213	0.794715	-0.809913	0.662632	0.532312
LB-CRC-47-P-07	LB-CRC-47	CRC	III	114	no	0	chemo_1	therapy	0.122068	0.121509	0.769575	0.527493	0.21327	1.28e-07	2.47336	0.231412	0.65427	0.572364	-0.000200843	-1.44941	0.264806	0.783858	0.645084	-1.86901	0.240026	-1.53244	-0.132223	1.01719	-1.0351	0.649556	-1.74245	0.588871	1.64706	0.60752	0.664888	0.443561	0.251634	0.325535	0.753914	0.953258	0.698523	0.563542	0.600872	1.42876	0.561856	0.901826	-0.751876	0.587427	0.523346
LB-CRC-47-P-08	LB-CRC-47	CRC	III	142	no	0	chemo_1	therapy	0.150301	0.150004	0.798681	0.519629	0.180856	8.11e-08	2.87316	0.289248	0.787062	0.831056	0.000456401	-1.40404	0.329873	0.732504	0.668061	-1.893	0.188966	-1.56874	-0.157539	0.953433	-1.04745	0.656005	-1.76672	0.592512	1.53015	0.59025	0.66442	0.526642	0.446647	0.461726	0.737001	0.913888	0.707387	0.612814	0.630711	1.31997	0.536007	0.886176	-0.77684	0.617823	0.525812
LB-CRC-47-P-09	LB-CRC-47	CRC	III	177	no	0	chemo_1	therapy	0.0763334	0.0758741	0.591678	0.432725	0.366778	0.00293759	1.1798	0.176402	0.544824	0.208119	-4.95e-06	-1.29456	0.56711	0.612894	0.679176	-1.86972	-0.139529	-1.599	-0.323603	0.61913	-1.09383	0.676859	-1.73336	0.859389	0.957875	0.663499	0.671467	0.695696	0.686442	0.79716	0.651867	0.568439	0.662802	0.742907	0.721435	0.786887	0.370104	0.735011	-0.833048	0.737179	0.574524
LB-CRC-47-P-10	LB-CRC-47	Healthy_control	III	226	no	0	post_chemo_1	remission	0.139348	0.137766	0.748731	0.4962	0.22641	2.25e-08	2.1916	0.280829	0.800927	0.615464	0.000168045	-1.46344	0.0594762	0.825599	0.565654	-1.84398	0.51219	-1.46557	-0.0316649	1.21762	-0.991424	0.521514	-1.70705	0.355425	2.04773	0.46685	0.691379	0.266456	0.0911225	0.137378	0.868526	1.15321	0.66052	0.38392	0.440214	1.79189	0.754602	0.967153	-0.659543	0.468538	0.575537
LB-CRC-48-P-01	LB-CRC-48	CRC	IV	-14	yes	0	baseline	diagnosis	0.325624	0.321733	0.807559	0.36548	0.120379	0.00262367	3.03609	0.890949	2.30731	2.705	0.00192422	-1.04897	-0.02536	0.320979	0.211168	-1.26322	-0.104549	-1.02368	-0.25156	0.460396	-0.730572	0.172179	-1.19122	0.159675	0.737758	0.187289	0.234978	0.0840437	-0.0701147	-0.0560403	0.257199	0.397297	0.261894	0.146471	0.155192	0.53022	0.162855	0.318837	-0.603827	0.153599	0.143012
LB-CRC-48-P-02	LB-CRC-48	CRC	IV	2	yes	0	pal_chemo	therapy	0.393861	0.387442	0.855501	0.349671	0.0634533	8.1e-08	5.51068	1.12638	2.59456	6.20711	0.00363465	-1.09327	-0.121622	0.398769	0.208439	-1.25284	0.00466947	-0.998136	-0.190815	0.603176	-0.699515	0.157972	-1.18638	0.112619	0.921998	0.173174	0.265686	0.02416	-0.175333	-0.149039	0.316	0.506966	0.274485	0.0829339	0.12418	0.716741	0.253708	0.365932	-0.572604	0.0973504	0.172357
LB-CRC-48-P-03	LB-CRC-48	CRC	IV	11	yes	0	pal_chemo	progressive_disease	0.448739	0.440904	0.802813	0.270558	0.0831601	0.00288317	3.25346	1.65857	4.06885	5.39609	0.00586745	-1.08069	-0.0778846	0.388506	0.235624	-1.24389	0.0118013	-0.988757	-0.182491	0.593834	-0.691961	0.175601	-1.17127	0.154794	0.906294	0.172272	0.269678	0.0577574	-0.151384	-0.122743	0.316293	0.507355	0.277019	0.120129	0.134092	0.735734	0.244656	0.383729	-0.554732	0.108439	0.164177
LB-CRC-48-P-04	LB-CRC-48	CRC	IV	30	yes	0	post_chemo_1	progressive_disease	0.296469	0.29314	0.852274	0.417732	0.0992212	6.12e-08	4.21011	0.709711	1.73319	2.98796	0.0008853	-1.19312	-0.207138	0.502718	0.251339	-1.2901	0.180365	-1.00444	-0.112909	0.770004	-0.698529	0.178512	-1.22159	0.0560798	1.20855	0.196108	0.336992	-0.0425157	-0.327874	-0.285565	0.400579	0.675431	0.338169	0.0472902	0.115378	0.935766	0.354131	0.475011	-0.542652	0.0930798	0.24458
LB-CRC-49-P-02	LB-CRC-49	CRC	II	20	no	0	post_surgery_1	remission	0.175573	0.175287	0.84556	0.526188	0.132256	7.21813e-08	3.97856	0.33367	0.836413	1.32753	-0.000664958	-1.41999	0.307233	0.718914	0.659592	-1.88177	0.235441	-1.45583	-0.245121	0.882665	-1.09272	0.679997	-1.79948	0.621525	1.65155	0.627135	0.653509	0.502745	0.454178	0.493499	0.775128	0.967686	0.698183	0.633903	0.617181	1.30599	0.563033	0.909721	-0.804691	0.638236	0.523444
LB-CRC-49-P-01	LB-CRC-49	CRC	II	-1	yes	0	baseline	diagnosis	0.188912	0.188223	0.846012	0.512121	0.128751	4.05796e-08	3.9776	0.368883	0.945851	1.46727	-0.00150251	-1.49791	0.0231606	0.905355	0.658535	-1.78324	0.477517	-1.3383	-0.0608243	1.19192	-0.944697	0.653995	-1.71214	0.507254	2.01784	0.579352	0.701089	0.303508	-0.00492884	0.0424422	0.859549	1.25428	0.765121	0.45065	0.549951	1.67605	0.690105	1.03083	-0.662794	0.499265	0.560658
LB-CRC-50-P-02	LB-CRC-50	CRC	I	4	no	0	post_surgery_1	remission	0.215303	0.214172	0.838863	0.476744	0.132444	8.99e-08	3.5996	0.45161	1.15421	1.62562	0.000956756	-1.42327	0.420507	0.751829	0.676718	-1.94907	0.140516	-1.40882	-0.189077	1.01185	-1.00985	0.601203	-1.79052	0.59618	1.49948	0.595167	0.649441	0.581901	0.513499	0.456124	0.76503	0.922478	0.697099	0.661043	0.617652	1.32137	0.536149	0.843743	-0.774229	0.625082	0.518254
LB-CRC-50-P-01	LB-CRC-50	CRC	I	-1	yes	0	baseline	diagnosis	0.152871	0.152101	0.787111	0.498028	0.189972	1.05e-07	2.62159	0.306953	0.843168	0.804705	-0.000381907	-1.48886	-0.0116729	0.856395	0.544012	-1.8303	0.589015	-1.24509	0.0102452	1.3688	-0.942462	0.466293	-1.70184	0.321345	2.18919	0.459819	0.655837	0.230649	-0.0417395	0.0177514	0.881232	1.25642	0.655679	0.337639	0.418258	1.91185	0.773441	0.964801	-0.617391	0.397235	0.529146
LB-CRC-51-P-02	LB-CRC-51	CRC	II	8	no	0	post_surgery_1	remission	0.180183	0.17964	0.831172	0.512659	0.147124	9.77e-08	3.48455	0.351468	0.916618	1.22471	0.000460662	-1.42211	0.417773	0.782664	0.668459	-1.90989	0.184581	-1.39943	-0.200981	0.987283	-1.00451	0.620737	-1.79194	0.643457	1.51152	0.602743	0.661361	0.599272	0.520026	0.44027	0.777265	0.948566	0.675257	0.631399	0.624286	1.27861	0.526881	0.867338	-0.789689	0.641988	0.533771
LB-CRC-51-P-03	LB-CRC-51	CRC	II	31	no	0	post_surgery_1	remission	0.16096	0.159834	0.803676	0.516808	0.171299	3.03e-08	3.01699	0.311451	0.845693	0.939644	0.000670116	-1.50841	0.0141039	0.874656	0.610138	-1.80139	0.549868	-1.25219	-0.0319577	1.29297	-0.951211	0.550845	-1.70398	0.441535	2.07336	0.524784	0.678206	0.274031	-0.0143074	0.0282179	0.848175	1.22855	0.712657	0.403787	0.53335	1.78024	0.720121	0.97917	-0.63426	0.443558	0.561841
LB-CRC-51-P-01	LB-CRC-51	CRC	II	-3	yes	0	baseline	diagnosis	0.183847	0.180544	0.788669	0.48494	0.177035	6.33e-08	2.73922	0.379113	1.00278	1.03848	0.0012309	-1.50204	-0.0705752	0.878526	0.550624	-1.78249	0.640879	-1.2246	-0.0158818	1.34956	-0.940157	0.488245	-1.67861	0.34138	2.22223	0.455071	0.667012	0.219123	-0.0655192	-0.0213548	0.873915	1.26463	0.669069	0.301572	0.43636	1.88975	0.786355	0.994631	-0.608062	0.375852	0.555821
LB-CRC-51-P-04	LB-CRC-51	Healthy_control	II	177	no	0	post_surgery_1	remission	0.16962	0.167372	0.811973	0.513966	0.160855	3.97e-08	3.1952	0.330022	0.883068	1.05449	6.64e-05	-1.46702	-0.0899752	0.871757	0.48131	-1.79245	0.671104	-1.21605	0.0278859	1.44965	-0.916571	0.385945	-1.65841	0.276147	2.28938	0.375577	0.633142	0.168166	-0.0548319	-0.0522328	0.906512	1.26237	0.579556	0.241225	0.361492	1.97516	0.850713	0.907042	-0.603995	0.307301	0.501377
LB-CRC-52-P-02	LB-CRC-52	CRC	III	6	no	0	post_surgery_1	therapy	0.190713	0.19041	0.902231	0.538498	0.0812843	2.78e-08	6.62487	0.354157	0.82516	2.34625	-0.00201155	-1.46051	0.149228	0.782824	0.630669	-1.82617	0.385935	-1.3098	-0.111143	1.07637	-0.990255	0.634558	-1.74099	0.464121	1.88582	0.587884	0.69789	0.387674	0.151816	0.182915	0.810537	1.09832	0.737001	0.551927	0.549411	1.53296	0.595036	0.962193	-0.734808	0.57702	0.532903
LB-CRC-52-P-03	LB-CRC-52	CRC	III	34	no	0	post_surgery_1	therapy	0.161032	0.158568	0.776502	0.4968	0.195195	9.09e-08	2.54514	0.324139	0.894949	0.82498	0.000885745	-1.50635	-0.00822889	0.884832	0.620807	-1.78006	0.500871	-1.25493	-0.0137016	1.28149	-0.917016	0.575024	-1.68712	0.435642	2.03509	0.498244	0.716458	0.298415	-0.0138787	0.0576861	0.882474	1.23956	0.75458	0.3671	0.503227	1.78556	0.745468	0.997194	-0.565015	0.415352	0.564186
LB-CRC-52-P-01	LB-CRC-52	CRC	III	-1	yes	0	baseline	diagnosis	0.149201	0.147723	0.749936	0.483726	0.221986	1.1e-07	2.17908	0.308442	0.88053	0.672119	0.000658851	-1.49616	-0.0466426	0.854405	0.585421	-1.7578	0.600012	-1.21288	0.00432133	1.29065	-0.938429	0.541687	-1.68322	0.345929	2.16177	0.498362	0.684839	0.218548	-0.0901567	-0.024336	0.866632	1.22853	0.693739	0.375543	0.4468	1.84206	0.718948	0.994909	-0.607091	0.416007	0.564231
LB-CRC-52-P-04	LB-CRC-52	CRC	III	147	no	0	chemo_1	therapy	0.184151	0.183122	0.844077	0.512473	0.131025	8.67e-08	3.91127	0.359338	0.909745	1.40547	-0.000910577	-1.47645	0.0100403	0.902722	0.549748	-1.79045	0.546425	-1.23403	0.0061523	1.33966	-0.934643	0.481274	-1.67899	0.36834	2.14873	0.478803	0.697532	0.247474	0.0170569	0.0437775	0.889124	1.23668	0.676195	0.350785	0.437721	1.88688	0.759218	0.960814	-0.625541	0.369231	0.501216
LB-CRC-52-P-05	LB-CRC-52	CRC	III	175	no	0	chemo_1	therapy	0.162844	0.162205	0.785178	0.493736	0.187901	7.6e-08	2.62764	0.32982	0.900416	0.866648	0.000166815	-1.45379	0.207998	0.811112	0.650201	-1.84864	0.297307	-1.32955	-0.112817	1.08042	-1.00394	0.621034	-1.75359	0.54819	1.7611	0.610734	0.702425	0.43026	0.206423	0.279156	0.820778	1.02854	0.702915	0.561265	0.576021	1.51154	0.593114	0.91788	-0.706596	0.550325	0.510938
LB-CRC-52-P-06	LB-CRC-52	CRC	III	189	no	0	chemo_1	therapy	0.186266	0.184897	0.803545	0.486931	0.167412	3.6e-08	2.90858	0.38253	1.03726	1.11262	0.00102107	-1.48837	0.151423	0.834045	0.640228	-1.82023	0.402006	-1.28859	-0.0853022	1.15613	-0.980073	0.612323	-1.71705	0.533997	1.85468	0.589462	0.694865	0.37422	0.0943919	0.178314	0.836948	1.11154	0.730965	0.499593	0.554702	1.58479	0.626821	0.948299	-0.686129	0.512111	0.526205
LB-CRC-53-P-02	LB-CRC-53	CRC	III	5	no	0	post_surgery_1	remission	0.111325	0.111155	0.778755	0.54182	0.207721	5.28886e-08	2.6084	0.205466	0.568869	0.535938	-0.00145055	-1.44837	0.286446	0.804973	0.68434	-1.79772	0.192516	-1.33863	-0.145413	1.00911	-0.996424	0.66032	-1.7542	0.644424	1.59959	0.644981	0.686881	0.493454	0.265249	0.345686	0.744193	0.966438	0.725098	0.602632	0.61129	1.31728	0.553859	0.878237	-0.741267	0.606498	0.53242
LB-CRC-53-P-01	LB-CRC-53	CRC	III	0	yes	0	baseline	therapy	0.172848	0.172342	0.82268	0.510454	0.15522	9.09689e-08	3.28857	0.338616	0.872849	1.11356	-0.000350776	-1.49868	0.0229623	0.879455	0.574708	-1.74796	0.498874	-1.2503	-0.0567086	1.28893	-0.950934	0.52631	-1.69024	0.410222	2.08762	0.504173	0.668578	0.254548	0.0163663	0.0720648	0.875198	1.20821	0.694879	0.393032	0.464539	1.7869	0.751872	0.93196	-0.636214	0.426012	0.548054
LB-CRC-54-P-01	LB-CRC-54	CRC	IV	-5	yes	0	baseline	diagnosis	0.0853207	0.0848615	0.626434	0.448144	0.332251	0.00457435	1.34881	0.190387	0.606343	0.256796	6.53781e-05	-1.45495	0.243518	0.801487	0.636563	-1.88808	0.300318	-1.46114	-0.201561	1.02683	-1.07123	0.657727	-1.76782	0.65379	1.63321	0.616774	0.675448	0.443953	0.282547	0.398055	0.750752	1.01527	0.707991	0.59389	0.629478	1.40751	0.622664	0.874256	-0.779488	0.567198	0.518775
LB-CRC-54-P-02	LB-CRC-54	CRC	IV	35	yes	0	chemo_1	therapy	0.109942	0.109875	0.746824	0.516266	0.235489	3.1102e-08	2.19232	0.212956	0.625064	0.466868	-0.000242922	-1.42368	0.361272	0.762678	0.666663	-1.90026	0.164175	-1.4778	-0.186104	0.998561	-1.04347	0.698098	-1.77423	0.705298	1.50634	0.633698	0.687818	0.536058	0.37996	0.478621	0.75782	0.933935	0.70592	0.628625	0.636464	1.30162	0.511636	0.871531	-0.76512	0.584429	0.484186
LB-CRC-55-P-01	LB-CRC-55	CRC	II	-3	yes	0	baseline	diagnosis	0.108836	0.108728	0.723673	0.496208	0.253978	1.43765e-08	1.95374	0.219335	0.647784	0.428524	-0.000722449	-1.366	0.400082	0.702514	0.680906	-1.84767	0.116026	-1.46649	-0.202319	0.818763	-1.08602	0.73653	-1.75121	0.704893	1.39333	0.661541	0.691991	0.639257	0.546295	0.594889	0.726559	0.846272	0.715198	0.664845	0.689169	1.10042	0.43427	0.864414	-0.820009	0.682439	0.529402
LB-CRC-56-P-02	LB-CRC-56	CRC	I	28	no	0	post_surgery_1	remission	0.194427	0.193453	0.89117	0.5331	0.0867376	1.14e-07	6.14612	0.364711	0.854812	2.24156	-0.00122083	-1.47357	0.0494486	0.820084	0.54024	-1.83755	0.492652	-1.39162	-0.0429253	1.28139	-1.00645	0.475419	-1.74108	0.316919	2.14278	0.487977	0.653236	0.2685	0.0628067	0.126387	0.885581	1.19142	0.659898	0.395683	0.448545	1.7714	0.716276	0.934613	-0.669823	0.428774	0.488123
LB-CRC-56-P-01	LB-CRC-56	CRC	I	-8	yes	0	baseline	diagnosis	0.130831	0.130412	0.784139	0.526848	0.198763	4.56e-08	2.65063	0.248328	0.704605	0.658226	-0.000523709	-1.50535	-0.0515051	0.893461	0.594719	-1.79838	0.547547	-1.33048	0.0376244	1.37389	-0.920136	0.515539	-1.67723	0.373113	2.17867	0.508577	0.685221	0.248108	-0.0475375	0.0048609	0.874023	1.29146	0.698146	0.330213	0.457888	1.8486	0.738108	0.995034	-0.595095	0.373953	0.521541
LB-CRC-57-P-02	LB-CRC-57	CRC	II	5	no	0	post_surgery_1	remission	0.192125	0.192002	0.894451	0.53952	0.0836222	8.42e-08	6.45188	0.356103	0.822572	2.29753	-0.00231657	-1.40262	0.368624	0.733206	0.661345	-1.88193	0.149702	-1.45977	-0.198836	0.946244	-1.02977	0.681556	-1.7687	0.626992	1.50111	0.657139	0.666008	0.562431	0.448254	0.486408	0.749457	0.920374	0.700032	0.65241	0.634619	1.27196	0.520812	0.877102	-0.789726	0.651054	0.518853
LB-CRC-57-P-03	LB-CRC-57	CRC	II	32	no	0	post_surgery_1	remission	0.205877	0.205143	0.871107	0.509995	0.104859	6.99e-08	4.86362	0.403685	0.994139	1.96337	-1.67e-05	-1.42013	0.270111	0.767206	0.672141	-1.8489	0.2835	-1.42521	-0.134803	1.07247	-0.977057	0.695539	-1.74316	0.607075	1.70327	0.639456	0.684154	0.539198	0.351893	0.421242	0.851837	1.08273	0.709346	0.532507	0.627733	1.44903	0.551321	0.972652	-0.726756	0.552783	0.494015
LB-CRC-57-P-01	LB-CRC-57	CRC	II	-1	yes	0	baseline	diagnosis	0.213197	0.210629	0.856645	0.4965	0.113027	7.86e-08	4.39275	0.429399	1.03523	1.88624	-0.000331519	-1.47902	-0.128889	0.872475	0.528865	-1.73207	0.707135	-1.26536	0.00846158	1.41672	-0.881877	0.522447	-1.62995	0.285411	2.32554	0.42973	0.675326	0.178065	-0.113052	-0.0310961	0.985695	1.36924	0.674054	0.247876	0.412173	2.03208	0.798925	1.05156	-0.578624	0.330059	0.493815
LB-CRC-58-P-01	LB-CRC-58	CRC	IV	-1	yes	0	baseline	diagnosis	0.250832	0.247895	0.773539	0.415119	0.178543	0.000565689	2.32503	0.60424	1.75348	1.40488	0.00421825	-1.44272	0.222659	0.642508	0.526255	-1.85437	0.169377	-1.3452	-0.221135	0.889774	-1.05675	0.481342	-1.76504	0.458318	1.46243	0.470238	0.505687	0.36355	0.251187	0.274074	0.580342	0.772962	0.52397	0.454637	0.427086	1.21099	0.381196	0.703821	-0.83487	0.44043	0.344292
LB-CRC-58-P-02	LB-CRC-58	CRC	IV	1	yes	0	post_surgery_1	therapy	0.300966	0.296826	0.827206	0.414805	0.118659	4.66e-05	3.49578	0.725561	1.91603	2.5364	0.00486978	-1.47215	0.0463873	0.660943	0.503135	-1.79611	0.250303	-1.30299	-0.181744	0.955644	-1.0006	0.438653	-1.71222	0.358907	1.58174	0.426857	0.501951	0.222636	0.0211337	0.0600854	0.589456	0.868104	0.533636	0.351887	0.358737	1.29944	0.463232	0.706551	-0.773106	0.352795	0.372851
LB-CRC-59-P-01	LB-CRC-59	CRC	III	71	no	0	post_surgery_1	therapy	0.16297	0.161008	0.75248	0.477705	0.212757	8.4e-08	2.2453	0.341153	0.969825	0.765992	0.000594991	-1.4736	0.086974	0.849327	0.621764	-1.8117	0.440548	-1.40081	-0.0665073	1.14568	-0.981262	0.701214	-1.73303	0.522997	1.92322	0.556135	0.691036	0.401245	0.137369	0.219921	0.883646	1.22145	0.729176	0.437529	0.588814	1.65082	0.625616	1.07174	-0.696435	0.494465	0.522365
LB-CRC-59-P-02	LB-CRC-59	CRC	III	99	no	0	chemo_1	therapy	0.164748	0.164316	0.814598	0.512397	0.163151	2.76e-08	3.14063	0.321524	0.865436	1.00979	-0.000340192	-1.45201	0.148196	0.799734	0.655612	-1.82363	0.378599	-1.43051	-0.0859568	1.10976	-0.982976	0.698348	-1.74495	0.540759	1.84512	0.578654	0.687926	0.458431	0.228494	0.285949	0.871034	1.18195	0.748784	0.484579	0.587335	1.56938	0.590764	1.0545	-0.710641	0.535202	0.494761
LB-CRC-59-P-03	LB-CRC-59	CRC	III	127	no	0	chemo_1	therapy	0.164033	0.163433	0.80476	0.510874	0.170672	6.99e-08	2.99331	0.321083	0.871666	0.961102	-0.000220446	-1.47051	0.141173	0.827681	0.652632	-1.86061	0.440017	-1.43035	-0.100691	1.1655	-0.983644	0.646431	-1.74718	0.531623	1.93625	0.563309	0.681619	0.380003	0.127563	0.156808	0.862653	1.16079	0.728748	0.478307	0.550923	1.65173	0.635399	0.973685	-0.720898	0.529397	0.536231
LB-CRC-59-P-04	LB-CRC-59	CRC	III	155	no	0	chemo_1	therapy	0.154335	0.153593	0.805049	0.519809	0.172929	6.97e-08	3.00591	0.296907	0.815277	0.892474	-0.000576789	-1.49395	-0.259686	0.921781	0.549419	-1.67244	0.83816	-1.21701	0.0689186	1.48696	-0.835162	0.495981	-1.58178	0.213694	2.4375	0.395408	0.657321	0.0498167	-0.369562	-0.292924	0.917842	1.45358	0.684365	0.180092	0.351644	2.1398	0.860301	1.06845	-0.515321	0.287527	0.573291
LB-CRC-60-P-01	LB-CRC-60	CRC	IV	-1	yes	0	baseline	diagnosis	0.179185	0.178118	0.792232	0.483428	0.178814	5.44664e-08	2.70353	0.370656	1.01617	1.00208	0.00217787	-1.37923	0.435623	0.728162	0.63388	-1.86759	0.165773	-1.39296	-0.149964	0.948255	-1.04219	0.670927	-1.77082	0.628951	1.54208	0.621809	0.6686	0.60794	0.552035	0.559671	0.769393	0.902643	0.675852	0.633061	0.614578	1.2556	0.49559	0.852451	-0.791149	0.613397	0.477711
LB-CRC-60-P-02	LB-CRC-60	CRC	IV	6	no	0	post_surgery_1		0.135165	0.135091	0.821735	0.542612	0.165241	1.51348e-08	3.28377	0.2491	0.650481	0.817987	-0.000956568	-1.34687	0.477783	0.711492	0.676198	-1.87829	0.0841938	-1.40439	-0.19453	0.848004	-1.03959	0.665277	-1.77181	0.644987	1.41332	0.649411	0.662837	0.630552	0.589095	0.59479	0.715476	0.842268	0.685695	0.679645	0.638888	1.14223	0.428104	0.828648	-0.821405	0.652334	0.478405
LB-CRC-61-P-01	LB-CRC-61	CRC	IV	-6	yes	0	baseline	diagnosis	0.310137	0.306502	0.776279	0.349645	0.139945	0.00854718	2.49845	0.887006	2.35998	2.21614	-5.03984e-05	-1.44399	-0.282207	0.264514	0.109054	-1.5667	-0.0941554	-1.24223	-0.350293	0.52489	-0.977736	0.0622576	-1.5394	-0.0023369	0.872275	0.0900133	0.150677	-0.1072	-0.355894	-0.320102	0.182744	0.416946	0.195372	-0.00691847	0.0241078	0.703625	0.110216	0.285474	-0.815435	-0.0130564	0.0522459
LB-CRC-61-P-02	LB-CRC-61	CRC	IV	42	yes	0	chemo_1	therapy	0.116397	0.116165	0.734756	0.502919	0.242048	1.59984e-07	2.07776	0.231442	0.670817	0.480882	-0.000691643	-1.46106	0.167491	0.781393	0.62837	-1.78248	0.388415	-1.33081	-0.151317	1.10887	-1.00264	0.590889	-1.73029	0.557436	1.79795	0.57775	0.689722	0.413698	0.201801	0.276365	0.79049	1.04734	0.728649	0.50656	0.560378	1.5408	0.603711	0.902223	-0.710388	0.533797	0.55515
LB-CRC-62-P-01	LB-CRC-62	CRC	III	-1	yes	0	baseline	diagnosis	0.111821	0.111719	0.727637	0.500263	0.252988	1.36979e-07	1.97742	0.223524	0.674848	0.442	-0.000451071	-1.36138	0.498564	0.674745	0.702922	-1.92823	0.0761343	-1.49887	-0.28206	0.780791	-1.0668	0.700113	-1.78799	0.67155	1.26947	0.662084	0.64352	0.620239	0.557858	0.52082	0.682504	0.738071	0.687869	0.772865	0.664485	1.08744	0.448749	0.794012	-0.855131	0.756472	0.557465
LB-CRC-62-P-02	LB-CRC-62	CRC	III	8	no	0	post_surgery_1		0.0960928	0.0959512	0.75691	0.540155	0.228947	0	2.3593	0.177899	0.504466	0.419716	-0.00126809	-1.22295	0.726253	0.503475	0.703564	-1.84377	-0.210408	-1.50798	-0.372053	0.427619	-1.08692	0.782952	-1.76729	0.812789	0.765132	0.759308	0.579893	0.82151	0.846116	0.851815	0.531896	0.507724	0.665373	0.952695	0.755731	0.540053	0.153343	0.726646	-0.90362	0.885398	0.482625
LB-CRC-63-P-01	LB-CRC-63	CRC	II	-1	yes	0	baseline	diagnosis	0.179266	0.178201	0.756303	0.46865	0.210675	1.17096e-07	2.22451	0.382517	1.11871	0.850914	0.00183907	-1.45483	0.253438	0.80166	0.647603	-1.8975	0.313943	-1.3614	-0.176199	1.05674	-1.03122	0.640539	-1.77349	0.586954	1.76236	0.585132	0.671529	0.446433	0.30922	0.319019	0.821457	1.0511	0.697951	0.566829	0.607409	1.48371	0.589062	0.89836	-0.770905	0.541956	0.517414
LB-CRC-63-P-02	LB-CRC-63	CRC	II	6	no	0	post_surgery_1		0.151215	0.150625	0.742368	0.483353	0.228696	1.4163e-07	2.11352	0.312845	0.930827	0.661204	0.000654631	-1.47686	0.157309	0.846151	0.655358	-1.84886	0.400154	-1.2948	-0.0959978	1.12661	-0.974055	0.641209	-1.76729	0.562147	1.832	0.586372	0.683576	0.369452	0.105269	0.196489	0.834349	1.13463	0.739744	0.504169	0.604415	1.58575	0.611002	0.958502	-0.716832	0.500841	0.543009
LB-CRC-64-P-01	LB-CRC-64	CRC	II	-1	yes	0	baseline	diagnosis	0.130486	0.130397	0.776776	0.516489	0.20475	5.01059e-08	2.52254	0.252639	0.704078	0.637293	-0.000260901	-1.43681	0.292212	0.754695	0.630013	-1.86035	0.267397	-1.42384	-0.171235	1.0062	-1.01841	0.636499	-1.75129	0.56937	1.68546	0.595984	0.67093	0.485768	0.329946	0.394672	0.793932	0.983303	0.672477	0.608011	0.583958	1.39616	0.566411	0.902882	-0.741678	0.619685	0.502814
LB-CRC-64-P-02	LB-CRC-64	CRC	II	6	no	0	post_surgery_1		0.175134	0.174934	0.838143	0.512186	0.14175	4.68323e-08	3.6133	0.341934	0.871117	1.23551	-0.00097063	-1.38737	0.387568	0.734747	0.664465	-1.86796	0.175754	-1.45401	-0.16397	0.961043	-1.01762	0.649463	-1.77569	0.603307	1.57305	0.640468	0.688416	0.56937	0.506007	0.52051	0.803587	0.954984	0.696349	0.639603	0.603885	1.26669	0.501247	0.883182	-0.784413	0.598104	0.467014
LB-CRC-65-P-01	LB-CRC-65	CRC	II	-1	yes	0	baseline	diagnosis	0.135659	0.135498	0.76036	0.505498	0.212944	5.39284e-08	2.37385	0.268367	0.748074	0.637065	-0.000135972	-1.4734	0.291997	0.533847	0.501261	-1.93484	-0.0606873	-1.3878	-0.239476	0.917044	-1.03979	0.696782	-1.76753	0.751676	1.19652	0.678228	0.713926	0.614718	0.548816	0.596993	0.731964	0.867191	0.718857	0.730624	0.711262	0.992751	0.519125	0.85685	-0.763573	0.724251	0.576179
LB-CRC-65-P-02	LB-CRC-65	CRC	II	12	no	0	post_surgery_1		0.232755	0.232255	0.906981	0.48571	0.0743865	3.13322e-08	6.52954	0.479207	1.09344	3.129	-0.00121165	-1.48848	0.0130308	0.878753	0.655537	-1.80394	0.58842	-1.27231	-0.0768309	1.29115	-0.903438	0.601417	-1.69817	0.386404	2.16305	0.536417	0.691588	0.293999	-0.0542876	-0.0121997	0.906572	1.28961	0.726513	0.38992	0.458505	1.87578	0.738205	1.00643	-0.681982	0.451805	0.560171
LB-CRC-66-P-01	LB-CRC-66	CRC	IV	0	yes	0	baseline	diagnosis	0.25927	0.256093	0.802201	0.424693	0.143589	0.00119952	2.9577	0.610488	1.5898	1.80564	0.00268175	-1.59162	0.273778	0.443294	-0.0193013	-1.96646	-0.398117	-1.34125	-0.116462	0.971381	-0.907212	0.66219	-1.64035	0.712045	0.674339	0.693131	0.67861	0.602184	0.446242	0.495214	0.750175	0.870977	0.683549	0.628943	0.631215	0.457355	0.471971	0.795036	-0.733505	0.611126	0.480584
LB-CRC-67-P-01	LB-CRC-67	CRC	II	0	yes	0	baseline	diagnosis	0.115928	0.115846	0.763949	0.522459	0.2188	6.46675e-08	2.38784	0.221889	0.62523	0.529836	-0.000329171	-1.35391	0.463573	0.684602	0.657651	-1.89202	0.0874476	-1.39084	-0.206362	0.833914	-1.07145	0.675427	-1.77036	0.683265	1.33193	0.662129	0.655473	0.600137	0.572942	0.608786	0.696619	0.816068	0.674786	0.733051	0.673558	1.10698	0.446007	0.839504	-0.804025	0.697996	0.502046
LB-CRC-67-P-02	LB-CRC-67	CRC	II	6	no	0	post_surgery_1		0.132503	0.132412	0.840438	0.561605	0.14851	1.23014e-08	3.7816	0.235935	0.611546	0.892214	-0.00203456	-1.44445	0.273262	0.790303	0.660919	-1.88028	0.308697	-1.33502	-0.10957	1.02275	-1.00465	0.622309	-1.7651	0.525586	1.70527	0.611283	0.703818	0.445352	0.286765	0.311677	0.777997	1.00715	0.710266	0.605692	0.582834	1.3823	0.568885	0.896924	-0.749613	0.59974	0.569427
LB-CRC-68-P-01	LB-CRC-68	CRC	II	-1	yes	0	baseline	diagnosis	0.137032	0.136896	0.807533	0.532551	0.176999	4.7174e-08	3.00878	0.257313	0.693069	0.774198	-0.00109175	-1.45629	0.184652	0.808234	0.624443	-1.85253	0.321521	-1.31704	-0.119465	1.14145	-1.00052	0.588117	-1.74505	0.493855	1.86614	0.552121	0.698872	0.392713	0.180857	0.251712	0.848391	1.09186	0.709605	0.51585	0.556676	1.5639	0.648091	0.912864	-0.69728	0.49756	0.508815
LB-CRC-68-P-02	LB-CRC-68	CRC	II	7	no	0	post_surgery_1		0.169564	0.169417	0.852716	0.529229	0.130548	5.19313e-08	4.05391	0.320398	0.804365	1.29887	-0.00184749	-1.37379	0.42938	0.736318	0.669137	-1.87083	0.0617088	-1.38279	-0.224427	0.901245	-1.04498	0.651825	-1.77483	0.651324	1.42191	0.659714	0.653664	0.571223	0.528742	0.540283	0.732623	0.862017	0.695546	0.69774	0.64869	1.18014	0.472368	0.840784	-0.793877	0.623867	0.481631
LB-CRC-69-P-01	LB-CRC-69	CRC	IV	0	yes	0	baseline	diagnosis	0.188375	0.187755	0.860219	0.511629	0.118949	8.65683e-08	4.30125	0.368187	0.925145	1.58366	-0.00091118	-1.46907	0.179114	0.818478	0.65876	-1.8433	0.379404	-1.30402	-0.0665658	1.15542	-0.987123	0.665359	-1.75811	0.532603	1.91508	0.59926	0.695998	0.430461	0.158605	0.245077	0.812962	1.13079	0.730985	0.509961	0.549132	1.54993	0.591296	0.988617	-0.692035	0.514416	0.501735
LB-CRC-70-P-01	LB-CRC-70	CRC	III	-3	yes	0	baseline	diagnosis	0.113953	0.113884	0.767454	0.530578	0.216581	6.06926e-08	2.44979	0.21477	0.611891	0.526142	-0.000710377	-1.3933	0.362984	0.682775	0.655705	-1.89405	0.212143	-1.40872	-0.19331	0.907333	-1.07675	0.679412	-1.79391	0.624338	1.60413	0.635574	0.652619	0.552505	0.493814	0.555204	0.728768	0.890096	0.695039	0.626188	0.614942	1.31592	0.501193	0.904388	-0.80239	0.64714	0.479109
LB-Neg-03-P-01	LB-Neg-03	Healthy_control	NA	NA	NA	NA	NA	NA	0.0530176	0.0524553	0.536237	0.409831	0.349651	0.0635807	1.17211	0.129365	0.406451	0.15163	-0.000744348	-1.44212	0.0817171	0.781071	0.631787	-1.8017	0.450817	-1.28442	-0.0917415	1.06125	-1.03345	0.645225	-1.73551	0.452702	1.95258	0.583457	0.701642	0.331257	0.10607	0.23178	0.827708	1.14148	0.717684	0.50277	0.546181	1.63364	0.603866	1.01055	-0.708463	0.553171	0.531668
LB-Neg-04-P-01	LB-Neg-04	Healthy_control	NA	NA	NA	NA	NA	NA	0.0831578	0.0823381	0.641808	0.472264	0.309284	0.0090421	1.52696	0.176083	0.525751	0.268872	-0.000259818	-1.38989	0.42125	0.726744	0.671036	-1.89584	0.132084	-1.49841	-0.223662	0.860401	-1.11344	0.659461	-1.8136	0.654943	1.51173	0.6393	0.673814	0.522786	0.450053	0.516189	0.71244	0.859074	0.671576	0.700006	0.634399	1.20524	0.479461	0.821899	-0.82932	0.636062	0.486475
LB-Neg-05-P-01	LB-Neg-05	Healthy_control	NA	NA	NA	NA	NA	NA	0.0972329	0.0962433	0.671313	0.479042	0.297338	0.00121586	1.6111	0.202973	0.62327	0.327011	-0.000237527	-1.45574	0.14767	0.823587	0.634676	-1.83959	0.459508	-1.4115	-0.139602	1.12574	-0.99773	0.621988	-1.72718	0.517165	1.92147	0.554471	0.673727	0.346583	0.176032	0.248442	0.802798	1.11396	0.702763	0.501675	0.570677	1.60643	0.668441	0.921583	-0.72552	0.529521	0.540808
LB-Neg-08-P-01	LB-Neg-08	Healthy_control	NA	NA	NA	NA	NA	NA	0.126457	0.124864	0.724989	0.494841	0.245246	1.04e-07	2.01773	0.255552	0.755697	0.515634	0.000311667	-1.44963	0.229795	0.778611	0.61655	-1.85361	0.327541	-1.34656	-0.187201	1.09883	-1.04338	0.608573	-1.78576	0.51612	1.81754	0.559606	0.642013	0.406973	0.277738	0.329998	0.781295	1.04125	0.686722	0.574135	0.570085	1.52912	0.576655	0.88964	-0.759855	0.537774	0.501653
LB-Neg-09-P-01	LB-Neg-09	Healthy_control	NA	NA	NA	NA	NA	NA	0.111421	0.110238	0.683899	0.472685	0.283565	0.000907178	1.66694	0.23572	0.715023	0.392931	0.000279435	-1.42582	0.358809	0.729462	0.645419	-1.89536	0.1944	-1.4861	-0.222105	0.932275	-1.08083	0.663473	-1.80106	0.605742	1.64354	0.593773	0.632789	0.470671	0.430835	0.473017	0.705507	0.929468	0.694923	0.660367	0.608856	1.33099	0.527215	0.852758	-0.811251	0.615574	0.506175
LB-Neg-10-P-01	LB-Neg-10	Healthy_control	NA	NA	NA	NA	NA	NA	0.121409	0.120514	0.75427	0.516237	0.221786	1.08e-07	2.32763	0.235182	0.670558	0.547416	-0.000762987	-1.46503	0.108427	0.825551	0.606573	-1.8357	0.485626	-1.3969	-0.116712	1.17081	-1.00763	0.629126	-1.74935	0.435947	2.07202	0.517268	0.659372	0.346783	0.166758	0.24094	0.89395	1.19171	0.688067	0.436119	0.516574	1.70515	0.659698	1.01066	-0.697827	0.474347	0.485054
LB-Neg-11-P-01	LB-Neg-11	Healthy_control	NA	NA	NA	NA	NA	NA	0.0905726	0.0897947	0.690208	0.501112	0.276781	0.00169525	1.8105	0.180743	0.528528	0.327235	-0.000907636	-1.48514	0.0410328	0.850326	0.58119	-1.83312	0.506712	-1.24301	-0.0752202	1.31211	-0.978535	0.539267	-1.72208	0.384507	2.20979	0.491443	0.660596	0.253462	0.0281562	0.09288	0.854087	1.20657	0.652468	0.375086	0.439442	1.85685	0.767318	0.933247	-0.683775	0.432299	0.514021
LB-Neg-12-P-01	LB-Neg-12	Healthy_control	NA	NA	NA	NA	NA	NA	0.0973422	0.0965549	0.690431	0.49186	0.271806	0.00469503	1.8096	0.197906	0.580608	0.358131	-0.000571441	-1.44396	0.259074	0.791579	0.652457	-1.87444	0.270095	-1.36391	-0.148537	1.05276	-1.02353	0.63314	-1.77345	0.64027	1.73006	0.587429	0.676472	0.468704	0.371578	0.408362	0.855377	1.01868	0.699396	0.545438	0.612711	1.46685	0.568382	0.899564	-0.769531	0.543979	0.53698
LB-Neg-14-P-01	LB-Neg-14	Healthy_control	NA	NA	NA	NA	NA	NA	0.0855164	0.0846318	0.645133	0.466671	0.307499	0.0121285	1.51763	0.183248	0.563302	0.278103	-0.000369145	-1.40656	0.391437	0.693103	0.638359	-1.90582	0.153721	-1.4091	-0.220078	0.921116	-1.08577	0.643325	-1.80686	0.608119	1.58083	0.612756	0.663219	0.521515	0.482579	0.515526	0.703553	0.881245	0.68854	0.666451	0.61518	1.2941	0.505015	0.865409	-0.811678	0.627587	0.474678
LB-Neg-15-P-01	LB-Neg-15	Healthy_control	NA	NA	NA	NA	NA	NA	0.098271	0.0967357	0.639847	0.453303	0.321565	0.00295521	1.40968	0.216789	0.684922	0.305602	-0.000136111	-1.49742	-0.0228823	0.861825	0.584273	-1.8074	0.627631	-1.26458	-0.045422	1.24786	-0.988168	0.538468	-1.72075	0.390591	2.19303	0.511067	0.661824	0.214475	-0.0672337	-0.0116444	0.820535	1.22561	0.703404	0.41073	0.472022	1.7926	0.715953	0.963957	-0.646992	0.454388	0.571097
LB-Neg-16-P-01	LB-Neg-16	Healthy_control	NA	NA	NA	NA	NA	NA	0.144947	0.143705	0.73389	0.475695	0.233642	0.00010532	2.036	0.304706	0.882863	0.620381	0.00121	-1.47106	0.14986	0.81539	0.647796	-1.87147	0.5064	-1.30082	-0.0993372	1.19072	-1.00408	0.602833	-1.72938	0.441979	1.95675	0.546309	0.676315	0.349529	0.115657	0.144227	0.838637	1.1347	0.709288	0.449514	0.498131	1.67051	0.661848	0.971031	-0.684653	0.500391	0.542941
LB-Neg-17-P-01	LB-Neg-17	Healthy_control	NA	NA	NA	NA	NA	NA	0.177379	0.160955	0.676374	0.425778	0.19845	0.0416634	2.14552	0.4166	1.07874	0.893822	0.00230718	-1.46518	0.103944	0.808667	0.624017	-1.79862	0.430745	-1.24814	-0.0600441	1.18219	-0.944995	0.649818	-1.69765	0.516759	1.94421	0.552384	0.678152	0.434432	0.15711	0.241601	0.878973	1.19733	0.709085	0.404409	0.554077	1.68815	0.611926	1.01201	-0.690045	0.469719	0.505883
LB-Neg-18-P-01	LB-Neg-18	Healthy_control	NA	NA	NA	NA	NA	NA	0.227761	0.186905	0.629781	0.39202	0.216821	0.0344249	1.80803	0.580994	1.43014	1.05046	0.00612593	-1.43201	0.350978	0.765022	0.697442	-1.87755	0.198041	-1.35503	-0.205441	1.00581	-1.05188	0.657693	-1.78771	0.663512	1.60704	0.636264	0.631322	0.490215	0.368099	0.413831	0.697167	0.93835	0.680415	0.62935	0.60326	1.35871	0.526129	0.869113	-0.77553	0.600563	0.516411
LB-Neg-19-P-01	LB-Neg-19	Healthy_control	NA	NA	NA	NA	NA	NA	0.165972	0.163667	0.72712	0.458877	0.227344	0.00177009	2.01843	0.361691	1.03605	0.730048	0.00170147	-1.41861	0.354515	0.748549	0.616612	-1.91497	0.279641	-1.36921	-0.178003	1.04157	-1.0395	0.613454	-1.79027	0.609272	1.66705	0.574068	0.634909	0.493755	0.44622	0.490475	0.779115	0.946152	0.675653	0.583959	0.570424	1.39561	0.533722	0.835223	-0.772736	0.573357	0.476433
LB-Neg-20-P-01	LB-Neg-20	Healthy_control	NA	NA	NA	NA	NA	NA	0.0660289	0.0646847	0.548884	0.411422	0.355284	0.044687	1.15801	0.16049	0.501243	0.185848	-0.00041477	-1.47369	0.0759746	0.781711	0.606574	-1.82047	0.437367	-1.26984	-0.0609512	1.15245	-1.02855	0.590718	-1.73402	0.415377	2.06649	0.535034	0.674921	0.284591	0.0786828	0.113951	0.816103	1.15405	0.704998	0.485392	0.503793	1.68412	0.661301	0.972863	-0.71061	0.527602	0.517372
LB-Neg-21-P-01	LB-Neg-21	Healthy_control	NA	NA	NA	NA	NA	NA	0.152672	0.139173	0.659573	0.438753	0.240355	0.0319696	1.82543	0.347968	0.957038	0.635192	0.00228429	-1.35691	0.529007	0.671829	0.628991	-1.90911	0.0567674	-1.48805	-0.286145	0.80858	-1.07696	0.669904	-1.79707	0.704115	1.2901	0.617551	0.602333	0.644953	0.683309	0.70764	0.702489	0.784455	0.652167	0.723795	0.710031	1.06332	0.421972	0.825061	-0.839525	0.679841	0.452007
LB-Neg-23-P-01	LB-Neg-23	Healthy_control	NA	NA	NA	NA	NA	NA	0.0864129	0.0854621	0.658445	0.475989	0.293441	0.0125508	1.6221	0.181544	0.534587	0.294481	-0.000470999	-1.43054	0.232215	0.782129	0.646178	-1.84699	0.373494	-1.33559	-0.171738	1.07259	-1.03389	0.633688	-1.74361	0.490314	1.90377	0.566472	0.668625	0.394276	0.24966	0.291198	0.831498	1.07709	0.71709	0.550437	0.542547	1.55794	0.61426	0.920238	-0.746207	0.571746	0.508378
LB-Neg-28-P-01	LB-Neg-28	Healthy_control	NA	NA	NA	NA	NA	NA	0.107438	0.106501	0.685701	0.476942	0.276315	0.00456502	1.72608	0.225263	0.667673	0.388822	-0.000106668	-1.39164	0.398032	0.702143	0.624496	-1.93416	0.16137	-1.47824	-0.220372	0.909259	-1.1031	0.61909	-1.81632	0.637135	1.5626	0.621132	0.640221	0.498101	0.510313	0.555093	0.709697	0.863729	0.648843	0.680082	0.605177	1.26278	0.510709	0.811982	-0.835395	0.616816	0.487509
LB-Neg-31-P-01	LB-Neg-31	Healthy_control	NA	NA	NA	NA	NA	NA	0.20912	0.187781	0.674191	0.409467	0.210071	0.0311206	1.94919	0.510712	1.33619	0.995472	0.00302808	-1.49046	0.0143048	0.871063	0.608243	-1.75879	0.57149	-1.24204	-0.0614036	1.31999	-0.934417	0.571116	-1.68118	0.41948	2.1265	0.496114	0.682137	0.264802	-0.0403979	0.0389212	0.855365	1.23669	0.679696	0.383675	0.49183	1.83205	0.734386	0.990249	-0.629507	0.429352	0.554004
LB-Neg-34-P-01	LB-Neg-34	Healthy_control	NA	NA	NA	NA	NA	NA	0.255769	0.224268	0.679312	0.39699	0.197952	0.0118381	2.00549	0.64427	1.63607	1.29208	0.00679156	-1.4303	0.373406	0.806122	0.663356	-1.88374	0.173447	-1.35519	-0.189243	1.0041	-1.03997	0.646357	-1.77921	0.63058	1.57377	0.609255	0.642941	0.538995	0.415199	0.436066	0.757931	0.956349	0.686565	0.619317	0.615131	1.34434	0.529003	0.877533	-0.793132	0.590211	0.477199
LB-Neg-37-P-01	LB-Neg-37	Healthy_control	NA	NA	NA	NA	NA	NA	0.0699507	0.0681593	0.565626	0.420245	0.361485	0.0282741	1.16255	0.166452	0.53092	0.19351	-0.000499129	-1.47261	0.110998	0.786897	0.636631	-1.80223	0.431599	-1.2128	-0.109729	1.05414	-1.05598	0.600191	-1.75883	0.496627	1.91588	0.569423	0.699613	0.328759	0.117082	0.214836	0.78271	1.06667	0.721796	0.56666	0.580452	1.53172	0.641176	0.918413	-0.712248	0.585788	0.554112
LB-Neg-38-P-01	LB-Neg-38	Healthy_control	NA	NA	NA	NA	NA	NA	0.245496	0.218477	0.714667	0.415759	0.180665	0.0118392	2.30127	0.590476	1.47293	1.35885	0.00556673	-1.41265	0.359067	0.750798	0.655912	-1.85577	0.192546	-1.35507	-0.153238	0.99908	-1.01341	0.633112	-1.7738	0.596111	1.62745	0.608565	0.645155	0.503528	0.439827	0.468755	0.79036	0.977152	0.673267	0.630106	0.610487	1.36966	0.536245	0.905391	-0.790973	0.604877	0.470325
LB-Neg-39-P-01	LB-Neg-39	Healthy_control	NA	NA	NA	NA	NA	NA	0.0724933	0.0707436	0.586714	0.436611	0.343328	0.0313484	1.2717	0.166036	0.528512	0.211148	-9.82e-06	-1.35852	0.431269	0.714853	0.669407	-1.86728	0.123897	-1.37801	-0.291943	0.855436	-1.09533	0.673309	-1.78671	0.695095	1.44819	0.630365	0.637193	0.531539	0.502848	0.554973	0.659107	0.831981	0.667412	0.702643	0.667059	1.19318	0.47517	0.791433	-0.828113	0.674185	0.519027
LB-Neg-40-P-01	LB-Neg-40	Healthy_control	NA	NA	NA	NA	NA	NA	0.166938	0.158671	0.685785	0.439465	0.249569	0.00511306	1.7609	0.379867	1.07691	0.668907	0.00225851	-1.44046	0.340045	0.734678	0.635679	-1.88329	0.247553	-1.34182	-0.183867	1.01248	-1.04955	0.6587	-1.79676	0.626869	1.66752	0.586044	0.647866	0.494384	0.39866	0.428049	0.762008	0.955941	0.664982	0.591904	0.597772	1.40489	0.566892	0.862225	-0.783307	0.595914	0.477801
LB-Neg-41-P-01	LB-Neg-41	Healthy_control	NA	NA	NA	NA	NA	NA	0.1274	0.117525	0.630676	0.432534	0.277714	0.0313286	1.55748	0.294543	0.845041	0.458744	0.00176976	-1.43043	0.335637	0.747767	0.685831	-1.8773	0.277957	-1.35768	-0.218405	0.970337	-1.05679	0.68229	-1.76699	0.684791	1.562	0.647854	0.667924	0.463233	0.335072	0.42998	0.684191	0.935916	0.704203	0.638979	0.638698	1.31865	0.526752	0.853711	-0.785229	0.595329	0.527427
LB-Neg-45-P-01	LB-Neg-45	Healthy_control	NA	NA	NA	NA	NA	NA	0.264286	0.222254	0.66338	0.386509	0.193916	0.0200273	1.99318	0.683777	1.65689	1.36289	0.00651658	-1.40616	0.354098	0.749482	0.656374	-1.85885	0.175085	-1.28733	-0.146775	0.975905	-1.03933	0.638448	-1.75427	0.654949	1.56986	0.635611	0.670826	0.531115	0.414134	0.452729	0.759999	0.924053	0.674457	0.60787	0.652814	1.35537	0.532126	0.860369	-0.772865	0.571194	0.520642
LB-Neg-46-P-01	LB-Neg-46	Healthy_control	NA	NA	NA	NA	NA	NA	0.27144	0.233208	0.691397	0.395718	0.176149	0.0143574	2.2465	0.685944	1.65949	1.54097	0.00871301	-1.40117	0.335861	0.75698	0.661733	-1.84791	0.190037	-1.31868	-0.15259	1.00272	-0.991516	0.627569	-1.75435	0.60345	1.55826	0.62209	0.671842	0.537328	0.420841	0.443872	0.786209	1	0.699436	0.594385	0.625405	1.32739	0.514901	0.906485	-0.766709	0.561839	0.4987
LB-Neg-47-P-01	LB-Neg-47	Healthy_control	NA	NA	NA	NA	NA	NA	0.110402	0.109554	0.685723	0.473129	0.276505	0.00397529	1.71111	0.233345	0.690645	0.399278	0.00033574	-1.40966	0.373713	0.733661	0.659331	-1.89269	0.203923	-1.35639	-0.213051	0.954474	-1.0593	0.64573	-1.76187	0.666853	1.56126	0.624772	0.640258	0.488985	0.414415	0.469195	0.717942	0.884858	0.688171	0.630489	0.620221	1.31591	0.558128	0.815542	-0.792892	0.639305	0.516871
LB-Neg-48-P-01	LB-Neg-48	Healthy_control	NA	NA	NA	NA	NA	NA	0.142676	0.140271	0.719665	0.471929	0.239044	0.00198032	1.97423	0.302325	0.860639	0.59686	0.000504296	-1.37797	0.440058	0.693618	0.664129	-1.89593	0.121691	-1.37304	-0.248269	0.843658	-1.07694	0.648163	-1.78654	0.662629	1.43958	0.64402	0.643278	0.559612	0.540204	0.58943	0.705933	0.821588	0.678476	0.695508	0.667113	1.17157	0.510059	0.821585	-0.821593	0.663076	0.508098
LB-Neg-50-P-01	LB-Neg-50	Healthy_control	NA	NA	NA	NA	NA	NA	0.201309	0.181382	0.724547	0.454666	0.195237	0.00483918	2.32879	0.442762	1.12327	1.0311	0.00329691	-1.4546	0.219376	0.810715	0.697082	-1.85384	0.307499	-1.31854	-0.116594	1.09486	-0.997133	0.64766	-1.73263	0.604871	1.75016	0.593735	0.68967	0.472104	0.255216	0.302924	0.806352	1.04534	0.73197	0.544547	0.612713	1.47321	0.571918	0.976108	-0.715281	0.535805	0.53497
LB-Neg-51-P-01	LB-Neg-51	Healthy_control	NA	NA	NA	NA	NA	NA	0.322634	0.2786	0.726282	0.393278	0.134214	0.00410324	2.93022	0.82037	1.94529	2.40387	0.00808471	-1.46546	0.182172	0.860839	0.659244	-1.82994	0.378172	-1.29866	-0.0644097	1.18104	-0.954682	0.650999	-1.7404	0.54352	1.92101	0.552987	0.696568	0.432608	0.218463	0.251513	0.89529	1.18079	0.716593	0.424618	0.567904	1.6102	0.611657	1.00748	-0.711426	0.446622	0.482798
LB-Neg-52-P-01	LB-Neg-52	Healthy_control	NA	NA	NA	NA	NA	NA	0.170734	0.152438	0.656061	0.420424	0.221618	0.0387441	1.89706	0.4061	1.05366	0.770398	0.00239272	-1.4463	0.231663	0.754004	0.655059	-1.8377	0.342659	-1.41561	-0.150921	1.0567	-0.999763	0.643286	-1.74852	0.522213	1.77699	0.603182	0.687009	0.452296	0.259441	0.345865	0.798659	1.04718	0.738524	0.579067	0.59568	1.41475	0.553659	0.957842	-0.716715	0.584961	0.52372
LB-Neg-53-P-01	LB-Neg-53	Healthy_control	NA	NA	NA	NA	NA	NA	0.183303	0.167356	0.7025	0.451904	0.22008	0.00921686	2.05336	0.405624	1.07692	0.832894	0.00257416	-1.44565	0.272766	0.771709	0.663856	-1.88213	0.265093	-1.26949	-0.16484	0.985122	-1.04149	0.640645	-1.78921	0.562376	1.73124	0.600212	0.662483	0.482836	0.328997	0.38513	0.789209	1.04973	0.724182	0.600721	0.620605	1.39038	0.524048	0.925702	-0.772094	0.614975	0.523582
LB-Neg-54-P-01	LB-Neg-54	Healthy_control	NA	NA	NA	NA	NA	NA	0.208916	0.192552	0.719606	0.442723	0.198313	0.00747047	2.23245	0.471889	1.23599	1.05347	0.00465096	-1.37681	0.408402	0.709296	0.667106	-1.87874	0.124539	-1.38956	-0.199522	0.895659	-1.05575	0.690851	-1.77111	0.654567	1.48838	0.643548	0.652645	0.549742	0.490381	0.544779	0.732617	0.882207	0.697153	0.671716	0.656146	1.22872	0.485498	0.862229	-0.793572	0.628334	0.490775
LB-Neg-56-P-01	LB-Neg-56	Healthy_control	NA	NA	NA	NA	NA	NA	0.185389	0.173468	0.715668	0.451724	0.214422	0.00577177	2.1067	0.410403	1.10224	0.864597	0.00383329	-1.42771	0.321474	0.75248	0.647336	-1.87343	0.239284	-1.39712	-0.191411	1.01372	-1.04411	0.622301	-1.78875	0.64352	1.55134	0.635481	0.676944	0.538348	0.39078	0.444708	0.730913	0.955548	0.678357	0.643075	0.626056	1.33389	0.547049	0.830935	-0.791259	0.603329	0.491811
LB-Neg-58-P-01	LB-Neg-58	Healthy_control	NA	NA	NA	NA	NA	NA	0.191892	0.167614	0.656602	0.412564	0.231586	0.0289243	1.78147	0.465121	1.20946	0.828598	0.00185638	-1.46181	0.0141291	0.829692	0.56117	-1.81672	0.608184	-1.27396	-0.0630834	1.27628	-0.953249	0.567133	-1.70307	0.351996	2.16728	0.495783	0.664653	0.284181	0.0252756	0.100836	0.910949	1.26339	0.700731	0.364662	0.465001	1.83937	0.717665	1.0161	-0.629276	0.435886	0.529354
LB-Neg-59-P-01	LB-Neg-59	Healthy_control	NA	NA	NA	NA	NA	NA	0.115907	0.113374	0.713567	0.497888	0.251706	0.00290987	1.97805	0.232797	0.683121	0.460485	0.000504052	-1.49144	0.106552	0.839486	0.619862	-1.83617	0.451425	-1.2864	-0.0734504	1.21443	-0.987997	0.590782	-1.73938	0.484027	1.98187	0.552335	0.662809	0.317718	0.103836	0.173379	0.804185	1.15763	0.695473	0.446752	0.517953	1.72447	0.666218	0.935228	-0.69411	0.475201	0.524907
LB-Neg-60-P-01	LB-Neg-60	Healthy_control	NA	NA	NA	NA	NA	NA	0.182433	0.162398	0.647338	0.412569	0.236214	0.0312852	1.74659	0.442188	1.18267	0.772323	0.00299233	-1.42057	0.380156	0.72307	0.678646	-1.91004	0.277971	-1.48657	-0.216573	0.934363	-1.08776	0.652837	-1.80276	0.635647	1.51922	0.625425	0.631652	0.504774	0.427576	0.460308	0.730345	0.90691	0.710053	0.681195	0.622825	1.32189	0.487578	0.844525	-0.803713	0.617819	0.489932
LB-Neg-61-P-01	LB-Neg-61	Healthy_control	NA	NA	NA	NA	NA	NA	0.198353	0.18987	0.708709	0.434865	0.222403	0.00435332	1.9553	0.456126	1.29093	0.891864	0.0039739	-1.39214	0.343707	0.751068	0.672939	-1.86275	0.213112	-1.3734	-0.162916	0.983407	-1.02358	0.651569	-1.76412	0.590329	1.63967	0.610026	0.689009	0.49676	0.429666	0.439454	0.804757	0.973399	0.697029	0.610708	0.605336	1.36002	0.53928	0.907586	-0.772388	0.604754	0.491954
LB-Neg-62-P-01	LB-Neg-62	Healthy_control	NA	NA	NA	NA	NA	NA	0.214192	0.200034	0.768839	0.469606	0.163392	0.00258044	2.87411	0.456111	1.14296	1.31091	0.00278695	-1.40819	0.299407	0.729852	0.640413	-1.84456	0.269379	-1.34168	-0.15879	1.01705	-0.996669	0.692945	-1.75067	0.57255	1.7448	0.58861	0.65398	0.494323	0.375475	0.429506	0.814556	1.04466	0.70613	0.565378	0.608414	1.44077	0.526344	0.939795	-0.771666	0.564793	0.453534
LB-Neg-63-P-01	LB-Neg-63	Healthy_control	NA	NA	NA	NA	NA	NA	0.131311	0.129855	0.682072	0.45293	0.271399	0.00488552	1.66887	0.289915	0.872016	0.483831	0.00106739	-1.38535	0.441963	0.717104	0.666582	-1.90746	0.111703	-1.29689	-0.224371	0.895337	-1.07135	0.665435	-1.78915	0.649206	1.50771	0.638598	0.639691	0.564586	0.514995	0.545577	0.708529	0.845225	0.692294	0.683255	0.611499	1.23325	0.498099	0.814078	-0.827322	0.650369	0.506096
LB-Neg-64-P-01	LB-Neg-64	Healthy_control	NA	NA	NA	NA	NA	NA	0.12036	0.119523	0.702192	0.477953	0.259374	0.0039367	1.84272	0.251824	0.737687	0.464042	0.000444459	-1.38832	0.400927	0.73517	0.67948	-1.88845	0.200939	-1.48582	-0.215398	0.888713	-1.0725	0.717517	-1.79277	0.66774	1.55799	0.631562	0.66032	0.569454	0.464389	0.498017	0.800029	0.942532	0.67768	0.646582	0.658711	1.25354	0.493504	0.891958	-0.797608	0.630266	0.500604
LB-Neg-65-P-01	LB-Neg-65	Healthy_control	NA	NA	NA	NA	NA	NA	0.139044	0.13687	0.666686	0.434722	0.275612	0.0100737	1.5773	0.319845	0.954209	0.504491	0.00167327	-1.36635	0.447644	0.699098	0.678853	-1.92237	0.110732	-1.36455	-0.170966	0.894696	-1.06412	0.671	-1.7983	0.651371	1.52581	0.609285	0.643329	0.591587	0.495441	0.525661	0.724849	0.822122	0.659486	0.655956	0.599858	1.18654	0.479637	0.810884	-0.82079	0.651524	0.495555
LB-Neg-67-P-01	LB-Neg-67	Healthy_control	NA	NA	NA	NA	NA	NA	0.099355	0.0982954	0.619676	0.437731	0.323985	0.0129734	1.35108	0.226977	0.72182	0.306665	0.000445386	-1.39072	0.443482	0.716138	0.71035	-1.9133	0.175427	-1.48103	-0.248077	0.858423	-1.07152	0.700663	-1.80418	0.702986	1.48813	0.606694	0.649294	0.548819	0.514049	0.569426	0.735453	0.886704	0.668955	0.646942	0.669653	1.20423	0.487638	0.829606	-0.841705	0.643522	0.499665
LB-Neg-68-P-01	LB-Neg-68	Healthy_control	NA	NA	NA	NA	NA	NA	0.177809	0.17252	0.703923	0.437975	0.234577	0.00520111	1.86708	0.405981	1.16332	0.758	0.00334473	-1.38631	0.456123	0.732884	0.659669	-1.92632	0.161452	-1.40622	-0.257171	0.904414	-1.07089	0.642944	-1.81281	0.695169	1.46413	0.649589	0.632789	0.548647	0.505263	0.538036	0.716377	0.831662	0.673984	0.668058	0.607924	1.22475	0.607346	0.809152	-0.799979	0.617238	0.504692
LB-Neg-69-P-01	LB-Neg-69	Healthy_control	NA	NA	NA	NA	NA	NA	0.216964	0.199176	0.699099	0.413873	0.199774	0.023526	2.0717	0.52423	1.37148	1.08605	0.00408258	-1.46842	0.136695	0.839385	0.658553	-1.83811	0.413356	-1.29806	-0.0907277	1.17684	-0.947548	0.677439	-1.71319	0.513616	1.93021	0.572157	0.684221	0.365583	0.105517	0.169605	0.829264	1.12894	0.737294	0.509165	0.565733	1.58426	0.624963	0.978398	-0.694233	0.541314	0.569284
LB-Neg-70-P-01	LB-Neg-70	Healthy_control	NA	NA	NA	NA	NA	NA	0.166032	0.151767	0.630496	0.404579	0.233429	0.0396697	1.7332	0.410382	1.12478	0.711274	0.00350418	-1.39562	0.390969	0.724663	0.67523	-1.85848	0.187747	-1.37329	-0.19457	0.923266	-1.03454	0.679073	-1.75474	0.631426	1.5919	0.626024	0.674199	0.552686	0.466309	0.517575	0.769587	0.927632	0.69304	0.628561	0.668308	1.29751	0.482262	0.896219	-0.778255	0.64148	0.485077
LB-Neg-71-P-01	LB-Neg-71	Healthy_control	NA	NA	NA	NA	NA	NA	0.189889	0.171552	0.71154	0.450218	0.207365	0.00994561	2.17113	0.421771	1.08869	0.915723	0.00210298	-1.48052	0.0599655	0.849946	0.638021	-1.84943	0.511142	-1.31303	-0.0662255	1.19157	-0.969909	0.58974	-1.73539	0.499437	2.00689	0.529684	0.680201	0.334967	0.0750291	0.177782	0.838816	1.19061	0.705056	0.407899	0.531847	1.74027	0.671815	0.983559	-0.683498	0.468164	0.535018
LB-Neg-72-P-01	LB-Neg-72	Healthy_control	NA	NA	NA	NA	NA	NA	0.204907	0.180968	0.64829	0.395865	0.212696	0.0373632	1.86118	0.517619	1.33839	0.963383	0.00372669	-1.49257	-0.176997	0.900161	0.544182	-1.68223	0.792267	-1.123	0.100356	1.44418	-0.862895	0.509868	-1.60547	0.251393	2.39928	0.424949	0.665563	0.0927676	-0.252741	-0.162631	0.912098	1.35022	0.672741	0.246712	0.386638	2.01075	0.807326	1.0053	-0.523957	0.317382	0.540761
LB-Neg-73-P-01	LB-Neg-73	Healthy_control	NA	NA	NA	NA	NA	NA	0.133181	0.119064	0.507519	0.327567	0.213013	0.0450508	1.53778	0.406576	1.10953	0.625224	0.0024432	-1.401	0.319666	0.772659	0.683669	-1.83997	0.221803	-1.25463	-0.132538	0.933071	-1.01678	0.712387	-1.76162	0.639775	1.58127	0.651234	0.684826	0.517358	0.368547	0.412674	0.757875	0.967926	0.72878	0.64259	0.659722	1.29106	0.506605	0.93536	-0.781147	0.633571	0.516037
LB-Neg-74-P-01	LB-Neg-74	Healthy_control	NA	NA	NA	NA	NA	NA	0.183541	0.16384	0.607139	0.374955	0.210322	0.0399199	1.78276	0.489503	1.3063	0.872668	0.00368536	-1.50015	-0.113929	0.907203	0.591199	-1.72861	0.671329	-1.15862	0.0613908	1.37835	-0.8703	0.568802	-1.62478	0.350528	2.27725	0.501443	0.714645	0.160534	-0.163425	-0.0778202	0.934547	1.34351	0.705171	0.305415	0.417781	1.96674	0.777565	1.0313	-0.56495	0.391538	0.537088
LB-Neg-75-P-01	LB-Neg-75	Healthy_control	NA	NA	NA	NA	NA	NA	0.193969	0.181036	0.743473	0.468479	0.190317	0.00189227	2.46157	0.414041	1.06972	1.01919	0.0028487	-1.50459	-0.0473206	0.901417	0.606983	-1.74655	0.601023	-1.19262	0.0241382	1.37219	-0.889849	0.551263	-1.64261	0.380109	2.17692	0.512968	0.680297	0.200241	-0.112675	-0.0278199	0.888905	1.27796	0.711976	0.347097	0.470984	1.88129	0.763939	0.990481	-0.598599	0.396433	0.544655
LB-Neg-78-P-01	LB-Neg-78	Healthy_control	NA	NA	NA	NA	NA	NA	0.118293	0.105275	0.492072	0.331369	0.239315	0.0441927	1.38465	0.356982	1.01165	0.494297	0.00225206	-1.36969	0.449235	0.681763	0.693748	-1.85987	0.0866857	-1.34661	-0.206809	0.841457	-1.05766	0.711438	-1.77071	0.691757	1.40435	0.653221	0.637957	0.569264	0.519477	0.558817	0.689259	0.80532	0.681333	0.700652	0.664616	1.17374	0.459629	0.792495	-0.81999	0.627538	0.465372
LB-Neg-80-P-01	LB-Neg-80	Healthy_control	NA	NA	NA	NA	NA	NA	0.192503	0.171232	0.65511	0.411379	0.223332	0.0320809	1.84201	0.467944	1.21762	0.861958	0.00413555	-1.46243	0.109108	0.834524	0.6697	-1.82224	0.351848	-1.27604	-0.0812027	1.13615	-0.976247	0.654529	-1.72092	0.591649	1.78769	0.602626	0.687921	0.383391	0.111685	0.201233	0.812814	1.14043	0.743789	0.520569	0.60886	1.55431	0.627271	0.950301	-0.704551	0.522674	0.54193
LB-Neg-81-P-01	LB-Neg-81	Healthy_control	NA	NA	NA	NA	NA	NA	0.150961	0.138307	0.606114	0.385265	0.210101	0.0467141	1.83371	0.391837	1.04085	0.718517	0.00272444	-1.38208	0.335599	0.753176	0.660023	-1.88317	0.135507	-1.25131	-0.133454	0.947806	-0.986646	0.7039	-1.74997	0.672735	1.52227	0.636472	0.684022	0.585483	0.474312	0.500348	0.785167	0.973166	0.72317	0.604476	0.672135	1.28628	0.499034	0.931084	-0.769754	0.639126	0.464952
[truncated: 1,965 more columns]

## Sheet: Supplementary Table 6 
Supplementary Table 6: Treatment monitoring
Sample_Type	LB_Nr	SampleID	Gender	Age	Material	UICC	UICC_Add	R-Class	clinical.data.indicating.presence.of.tumor..PET.SCAN..MRI..CT.	Microsatellites	Tumor	Site	Metastasis	MRD	Monitoring	Course	staging	sampling time	Therapy_S	Therapy_C	Days	Day_S_1	Day_S_2	Day_S_3	Day_C	Day_C_2	Day_C_3	Day_CIP	Day_pal_C	Day_Rez	Day_Rez_Surg	Day_Rez_2	Day_Rem	Day_PR	Day_SD	Day_PD_1	Day_PD_2	Day_PD_3	Day_PD_4	Day_Rad	Day_Stop_Rad	Day_Stop_C_1	Day_Stop_C_2	Death	Peak (bp)	cfDNA per ml plasma (ng/ml)	tumor_fraction	tumor_ploidy	filtered_tumor_fraction
CRC	LB-CRC-01	LB-CRC-01-P-01	m	84	Plasma	II	A	R0	yes	MSI-H	NA	NA	NA	MRD		before	diagnosis	baseline	Surgery	NA	-3	0	NA	NA	NA	NA	NA	NA	NA	NA	NA	NA	NA	NA	NA	NA	NA	NA	NA	NA	NA	NA	NA	NA	162	33.796	0	2	0.02586
CRC	LB-CRC-01	LB-CRC-01-P-02	m	84	Plasma	II	A	R0	no	MSI-H	NA	NA	NA	MRD		after	remission	post_surgery_1	Surgery	NA	3	0	NA	NA	NA	NA	NA	NA	NA	NA	NA	NA	NA	NA	NA	NA	NA	NA	NA	NA	NA	NA	NA	NA	165	23.0868	0	2.006	0.02394
CRC	LB-CRC-01	LB-CRC-01-P-03	m	84	Plasma	II	A	R0	no	MSI-H	NA	NA	NA	MRD		after	remission	post_surgery_1	Surgery	NA	36	0	NA	NA	NA	NA	NA	NA	NA	NA	NA	NA	NA	NA	NA	NA	NA	NA	NA	NA	NA	NA	NA	NA	167	17.2044	0	2.005	0
CRC	LB-CRC-04	LB-CRC-04-P-01	f	42	Plasma	IV	NA	NA	yes	MSS	NA	NA	Liver, Peritoneum			before	diagnosis	baseline	NA	Chemo	0	NA	NA	NA	NA	NA	NA	NA	NA	NA	NA	NA	NA	NA	NA	NA	NA	NA	NA	NA	NA	NA	NA	56	168	9.3004	0.4185	2.569	0.514
CRC	LB-CRC-07	LB-CRC-07-P-02	f	69	Plasma	II	A	R0	no	MSI	Karzinom	Colon ascendens	NA			after	remission	post_surgery_1	Surgery	Chemo	3	0	NA	NA	454	NA	NA	777	NA	214	228	440	NA	501	624	NA	NA	NA	NA	NA	NA	NA	NA	NA	166	13	0.0378	2.098	0.04222
CRC	LB-CRC-07	LB-CRC-07-P-06	f	69	Plasma	II	A	R0	no	MSI	Karzinom	Colon ascendens	Liver			after	remission	post_surgery_1	Surgery	Chemo	303	0	NA	NA	454	NA	NA	777	NA	214	228	440	NA	501	624	NA	NA	NA	NA	NA	NA	NA	NA	NA	175	4.51	0	2	0
CRC	LB-CRC-07	LB-CRC-07-P-08	f	69	Plasma	II	A	R0	yes	MSI	Karzinom	Colon ascendens	Liver			after	partial_remission	chemo_1	Surgery	Chemo	584	0	NA	NA	454	NA	NA	777	NA	214	228	440	NA	501	624	NA	NA	NA	NA	NA	NA	NA	NA	NA	167	51.29	0	1.999	0.04028
CRC	LB-CRC-07	LB-CRC-07-P-09	f	69	Plasma	II	A	R0	yes	MSI	Karzinom	Colon ascendens	Liver			after	partial_remission	chemo_1	Surgery	Chemo	616	0	NA	NA	454	NA	NA	777	NA	214	228	440	NA	501	624	NA	NA	NA	NA	NA	NA	NA	NA	NA	171	14.42	0.03181	2.04	0
CRC	LB-CRC-07	LB-CRC-07-P-10	f	69	Plasma	II	A	R0	yes	MSI	Karzinom	Colon ascendens	Liver			after	stable_disease	chemo_1	Surgery	Chemo	644	0	NA	NA	454	NA	NA	777	NA	214	228	440	NA	501	624	NA	NA	NA	NA	NA	NA	NA	NA	NA	168	26.92	0	2.003	0.04225
CRC	LB-CRC-07	LB-CRC-07-P-11	f	69	Plasma	II	A	R0	yes	MSI	Karzinom	Colon ascendens	Liver			after	stable_disease	chemo_1	Surgery	Chemo	672	0	NA	NA	454	NA	NA	777	NA	214	228	440	NA	501	624	NA	NA	NA	NA	NA	NA	NA	NA	NA	165	25.91	0	2.002	0.0453
CRC	LB-CRC-07	LB-CRC-07-P-12	f	69	Plasma	II	A	R0	yes	MSI	Karzinom	Colon ascendens	Liver			after	stable_disease	chemo_1	Surgery	Chemo	696	0	NA	NA	454	NA	NA	777	NA	214	228	440	NA	501	624	NA	NA	NA	NA	NA	NA	NA	NA	NA	155	129.66	0.04277	1.883	0.04093
CRC	LB-CRC-07	LB-CRC-07-P-13	f	69	Plasma	II	A	R0	yes		Karzinom	Colon ascendens	Liver			after	stable_disease	chemo_1	Surgery	Chemo	704	0	NA	NA	454	NA	NA	777	NA	214	228	440	NA	501	624	NA	NA	NA	NA	NA	NA	NA	NA	NA	173	171.26	0	1.997	0.05769
CRC	LB-CRC-07	LB-CRC-07-P-14	f	69	Plasma	II	A	R0	yes	MSI	Karzinom	Colon ascendens	Liver			after	stable_disease	chemo_1	Surgery	Chemo	758	0	NA	NA	454	NA	NA	777	NA	214	228	440	NA	501	624	NA	NA	NA	NA	NA	NA	NA	NA	NA	173	57.71	0	1.999	0.03857
CRC	LB-CRC-07	LB-CRC-07-P-15	f	69	Plasma	II	A	R0	yes	MSI	Karzinom	Colon ascendens	Liver			after	stable_disease	CIP_1	Surgery	Chemo	799	0	NA	NA	454	NA	NA	777	NA	214	228	440	NA	501	624	NA	NA	NA	NA	NA	NA	NA	NA	NA	168	89.43	0	1.997	0.05301
CRC	LB-CRC-07	LB-CRC-07-P-16	f	69	Plasma	II	A	R0	yes	MSI	Karzinom	Colon ascendens	Liver			after	stable_disease	CIP_1	Surgery	Chemo	822	0	NA	NA	454	NA	NA	777	NA	214	228	440	NA	501	624	NA	NA	NA	NA	NA	NA	NA	NA	NA	168	16.23	0.04966	1.819	0.04998
CRC	LB-CRC-07	LB-CRC-07-P-17	f	69	Plasma	II	A	R0	yes	MSI	Karzinom	Colon ascendens	Liver			after	stable_disease	CIP_1	Surgery	Chemo	862	0	NA	NA	454	NA	NA	777	NA	214	228	440	NA	501	624	NA	NA	NA	NA	NA	NA	NA	NA	NA	168	8.292	0.09835	2.846	0.04125
CRC	LB-CRC-07	LB-CRC-07-P-18	f	69	Plasma	II	A	R0	yes	MSI	Karzinom	Colon ascendens	Liver			after	stable_disease	CIP_1	Surgery	Chemo	893	0	NA	NA	454	NA	NA	777	NA	214	228	440	NA	501	624	NA	NA	NA	NA	NA	NA	NA	NA	NA	167	14.7536	0.08209	2.833	0.04111
CRC	LB-CRC-07	LB-CRC-07-P-19	f	69	Plasma	II	A	R0	yes	MSI	Karzinom	Colon ascendens	Liver			after	stable_disease	CIP_1	Surgery	Chemo	946	0	NA	NA	454	NA	NA	777	NA	214	228	440	NA	501	624	NA	NA	NA	NA	NA	NA	NA	NA	NA	172	2.5248	0.04062	1.997	0.03944
CRC	LB-CRC-07	LB-CRC-07-P-20	f	69	Plasma	II	A	R0	yes	MSI	Karzinom	Colon ascendens	Liver			after	stable_disease	CIP_1	Surgery	Chemo	1004	0	NA	NA	454	NA	NA	777	NA	214	228	440	NA	501	624	NA	NA	NA	NA	NA	NA	NA	NA	NA	171	1.656	0.04643	2.724	0
CRC	LB-CRC-07	LB-CRC-07-P-21	f	69	Plasma	II	A	R0	yes	MSI	Karzinom	Colon ascendens	Liver			after	stable_disease	CIP_1	Surgery	Chemo	1065	0	NA	NA	454	NA	NA	777	NA	214	228	440	NA	501	624	NA	NA	NA	NA	NA	NA	NA	NA	NA	173	1.9344	0	1.998	0
CRC	LB-CRC-08	LB-CRC-08-P-01	m	39	Plasma	IV	C	lokoregionär R0	yes	MSS	Adenokarzinom	Sigma	Liver, Peritoneum, Lung	MRD		before	diagnosis	baseline	Surgery	Chemo	-1	0	NA	NA	45	104	189		209	NA	NA	NA	NA	NA	NA	104	164	209	363	NA	NA	NA	NA	386	168	22.41	0.09148	2.831	0.03369
CRC	LB-CRC-08	LB-CRC-08-P-02	m	39	Plasma	IV	C	lokoregionär R0	yes	MSS	Adenokarzinom	Sigma	Liver, Peritoneum, Lung	MRD		during	therapy	post_surgery_1	Surgery	Chemo	3	0	NA	NA	45	104	189		209	NA	NA	NA	NA	NA	NA	104	164	209	363	NA	NA	NA	NA	386	175	41.562	0.03882	2.071	0.04692
CRC	LB-CRC-08	LB-CRC-08-P-03	m	39	Plasma	IV	C	lokoregionär R0	yes	MSS	Adenokarzinom	Sigma	Liver, Peritoneum, Lung	MRD		during	therapy	post_surgery_1	Surgery	Chemo	34	0	NA	NA	45	104	189		209	NA	NA	NA	NA	NA	NA	104	164	209	363	NA	NA	NA	NA	386	162	26.4768	0.03926	2.015	0.05426
CRC	LB-CRC-08	LB-CRC-08-P-04	m	39	Plasma	IV	C	lokoregionär R0	yes	MSS	Adenokarzinom	Sigma	Liver, Peritoneum, Lung	MRD		during	therapy	chemo_1	Surgery	Chemo	85	0	NA	NA	45	104	189		209	NA	NA	NA	NA	NA	NA	104	164	209	363	NA	NA	NA	NA	386	164	16.1992	0.03959	2.976	0.0359
CRC	LB-CRC-08	LB-CRC-08-P-05	m	39	Plasma	IV	C	lokoregionär R0	yes	MSS	Adenokarzinom	Sigma	Liver, Peritoneum, Lung	MRD		during	progressive_disease	chemo_2	Surgery	Chemo	181	0	NA	NA	45	104	189		209	NA	NA	NA	NA	NA	NA	104	164	209	363	NA	NA	NA	NA	386	165	5.8288	0.04644	2.038	0.06445
CRC	LB-CRC-08	LB-CRC-08-P-06	m	39	Plasma	IV	C	lokoregionär R0	yes	MSS	Adenokarzinom	Sigma	Liver, Peritoneum, Lung	MRD		during	progressive_disease	pal_chemo	Surgery	Chemo	352	0	NA	NA	45	104	189		209	NA	NA	NA	NA	NA	NA	104	164	209	363	NA	NA	NA	NA	386	159	31.482	0.2642	2.093	0.3409
CRC	LB-CRC-08	LB-CRC-08-P-07	m	39	Plasma	IV	C	lokoregionär R0	yes	MSS	Adenokarzinom	Sigma	Liver, Peritoneum, Lung	MRD		during	progressive_disease	pal_chemo	Surgery	Chemo	370	0	NA	NA	45	104	189		209	NA	NA	NA	NA	NA	NA	104	164	209	363	NA	NA	NA	NA	386	160	191.772	0.2649	2.124	0.3218
CRC	LB-CRC-13	LB-CRC-13-P-01	m	56	Plasma	IV	B	R0 (lokal)	yes	NA	NA	NA	NA	MRD		before	diagnosis	baseline	Surgery	Chemo	0	0	NA	NA	42	NA	NA	NA	NA	NA	NA	NA	NA	NA	NA	NA	NA	NA	NA	NA	NA	NA	NA	NA	168	2.5452	0.1064	2.079	0.3215
CRC	LB-CRC-13	LB-CRC-13-P-02	m	56	Plasma	IV	B	R0 (lokal)	yes	NA	NA	NA	NA	MRD		during	therapy	post_surgery_1	Surgery	Chemo	6	0	NA	NA	42	NA	NA	NA	NA	NA	NA	NA	NA	NA	NA	NA	NA	NA	NA	NA	NA	NA	NA	NA	171	4.3732	0	1.998	0.03059
CRC	LB-CRC-15	LB-CRC-15-P-01	m	77	Plasma	II	A	R0	yes	NA	Adenokarzinom	Colon ascendens	NA	MRD		before	diagnosis	baseline	Surgery	NA	-1	0	NA	NA	NA	NA	NA	NA	NA	NA	NA	NA	NA	NA	NA	NA	NA	NA	NA	NA	NA	NA	NA	NA	169	2.648	0	1.996	0.02846
CRC	LB-CRC-15	LB-CRC-15-P-02	m	77	Plasma	II	A	R0	no	NA	Adenokarzinom	Colon ascendens	NA	MRD		after	remission	post_surgery_1	Surgery	NA	4	0	NA	NA	NA	NA	NA	NA	NA	NA	NA	NA	NA	NA	NA	NA	NA	NA	NA	NA	NA	NA	NA	NA	170	15.432	0	1.999	0.05977
CRC	LB-CRC-15	LB-CRC-15-P-03	m	77	Plasma	II	A	R0	no	NA	Adenokarzinom	Colon ascendens	NA	MRD		after	remission	post_surgery_1	Surgery	NA	26	0	NA	NA	NA	NA	NA	NA	NA	NA	NA	NA	NA	NA	NA	NA	NA	NA	NA	NA	NA	NA	NA	NA	167	30.4736	0	2.001	0
CRC	LB-CRC-15	LB-CRC-15-P-04	m	77	Plasma	II	A	R0	no	NA	Adenokarzinom	Colon ascendens	NA	MRD		after	remission	post_surgery_1	Surgery	NA	60	0	NA	NA	NA	NA	NA	NA	NA	NA	NA	NA	NA	NA	NA	NA	NA	NA	NA	NA	NA	NA	NA	NA	171	5.328	0.1018	3.009	0.03415
CRC	LB-CRC-17	LB-CRC-17-P-01	f	82	Plasma	I	NA	R0	yes	NA	NA	NA	NA	MRD		before	diagnosis	baseline	Surgery	NA	-1	0	NA	NA	NA	NA	NA	NA	NA	NA	NA	NA	NA	NA	NA	NA	NA	NA	NA	NA	NA	NA	NA	NA	164	2.78871	0	1.998	0.03243
CRC	LB-CRC-17	LB-CRC-17-P-02	f	82	Plasma	I	NA	R0	no	NA	NA	NA	NA	MRD		after	remission	post_surgery_1	Surgery	NA	6	0	NA	NA	NA	NA	NA	NA	NA	NA	NA	NA	NA	NA	NA	NA	NA	NA	NA	NA	NA	NA	NA	NA	167	3.1376	0	1.997	0
CRC	LB-CRC-20	LB-CRC-20-P-01	m	80	Plasma	II	A	R0	yes	NA	Adenokarzinom	Sigma, Rectum	NA	MRD		before	diagnosis	baseline	Surgery	NA	-1	0	NA	NA	NA	NA	NA	NA	NA	NA	NA	NA	NA	NA	NA	NA	NA	NA	NA	NA	NA	NA	NA	NA	170	3.4176	0.03293	2.051	0.02961
CRC	LB-CRC-20	LB-CRC-20-P-02	m	80	Plasma	II	A	R0	no	NA	Adenokarzinom	Sigma, Rectum	NA	MRD		after	remission	post_surgery_1	Surgery	NA	5	0	NA	NA	NA	NA	NA	NA	NA	NA	NA	NA	NA	NA	NA	NA	NA	NA	NA	NA	NA	NA	NA	NA	165	17.3914	0.06599	2.917	0.04255
CRC	LB-CRC-20	LB-CRC-20-P-03	m	80	Plasma	II	A	R0	no	NA	Adenokarzinom	Sigma, Rectum	NA	MRD		after	remission	post_surgery_1	Surgery	NA	33	0	NA	NA	NA	NA	NA	NA	NA	NA	NA	NA	NA	NA	NA	NA	NA	NA	NA	NA	NA	NA	NA	NA	172	6.20727	0	1.999	0
CRC	LB-CRC-21	LB-CRC-21-P-01	f	76	Plasma	IV	NA	NA	yes	NA	Adenokarzinom	Colon	Ovary, Liver	MRD		before	diagnosis	baseline	Surgery	Chemo	-4	0	NA	NA	10	NA	NA	NA	NA	NA	NA	NA	NA	NA	NA	NA	NA	NA	NA	NA	NA	NA	NA	NA	167	12.86	0.135	1.985	0.2244
CRC	LB-CRC-21	LB-CRC-21-P-02	f	76	Plasma	IV	NA	NA	no	NA	Adenokarzinom	Colon	Ovary, Liver	MRD		during	therapy	post_surgery_1	Surgery	Chemo	8	0	NA	NA	10	NA	NA	NA	NA	NA	NA	NA	NA	NA	NA	NA	NA	NA	NA	NA	NA	NA	NA	NA	166	8.4256	0.2484	1.943	0.4013
CRC	LB-CRC-21	LB-CRC-21-P-03	f	76	Plasma	IV	NA	NA	no	NA	Adenokarzinom	Colon	Ovary, Liver	MRD		during	therapy	chemo_1	Surgery	Chemo	43	0	NA	NA	10	NA	NA	NA	NA	NA	NA	NA	NA	NA	NA	NA	NA	NA	NA	NA	NA	NA	NA	NA	168	7.816	0	1.999	0.03746
CRC	LB-CRC-22	LB-CRC-22-P-01	m	53	Plasma	III	C	R0	yes	NA	NA	NA	NA	MRD		before	diagnosis	baseline	Surgery	Chemo	-1	0	NA	NA	42	NA	NA	NA	NA	NA	NA	NA	NA	NA	NA	NA	NA	NA	NA	NA	NA	NA	NA	NA	165	3.9036	0.03667	2.05	0.06765
CRC	LB-CRC-22	LB-CRC-22-P-02	m	53	Plasma	III	C	R0	no	NA	NA	NA	NA	MRD			therapy	post_surgery_1	Surgery	Chemo	6	0	NA	NA	42	NA	NA	NA	NA	NA	NA	NA	NA	NA	NA	NA	NA	NA	NA	NA	NA	NA	NA	NA	169	3.4866	0	2.001	0.03535
CRC	LB-CRC-25	LB-CRC-25-P-02	m	77	Plasma	III	B	R0	no	MSS	Adenokarzinom	Rectum	NA			after	therapy	post_surgery_1	Surgery	Chemo	20	0	NA	NA	53	NA	NA	NA	NA	391	442	NA	NA	NA	NA	NA	NA	NA	NA	434	NA	233	NA	NA	175	12.41	0.03139	1.964	0.04752
CRC	LB-CRC-27	LB-CRC-27-P-01	m	78	Plasma	IV	A	lokoregionär R0, R2 (Leber)	yes	NA	Adenokarzinom	Rectum	Liver	MRD		before	diagnosis	baseline	Surgery	Chemo	-1	0	NA	NA	9	NA	NA	NA	NA	NA	NA	NA	NA	NA	NA	NA	NA	NA	NA	NA	NA	NA	NA	NA	166	27.05	0.07879	2.198	0.1201
CRC	LB-CRC-27	LB-CRC-27-P-02	m	78	Plasma	IV	A	lokoregionär R0, R2 (Leber)	no	NA	Adenokarzinom	Rectum	Liver	MRD		during	therapy	post_surgery_1	Surgery	Chemo	7	0	NA	NA	9	NA	NA	NA	NA	NA	NA	NA	NA	NA	NA	NA	NA	NA	NA	NA	NA	NA	NA	NA	168	17.8304	0.04628	2.812	0.09063
CRC	LB-CRC-28	LB-CRC-28-P-01	f	76	Plasma	I	NA	R0	yes	NA	Adenokarzinom	Colon Transversum	NA	MRD		before	diagnosis	baseline	Surgery	NA	-2	0	NA	NA	NA	NA	NA	NA	NA	NA	NA	NA	NA	NA	NA	NA	NA	NA	NA	NA	NA	NA	NA	NA	169	3.288	0	2.001	0.03773
CRC	LB-CRC-28	LB-CRC-28-P-02	f	76	Plasma	I	NA	R0	no	NA	Adenokarzinom	Colon Transversum	NA	MRD		after	remission	post_surgery_1	Surgery	NA	7	0	NA	NA	NA	NA	NA	NA	NA	NA	NA	NA	NA	NA	NA	NA	NA	NA	NA	NA	NA	NA	NA	NA	167	4.692	0	2.001	0.03702
CRC	LB-CRC-29	LB-CRC-29-P-01	m	83	Plasma	III	B	NA	yes	NA	Adenokarzinom	Colon ascendens	NA			before	diagnosis	baseline	Surgery	Chemo	-2	0	NA	NA	19	NA	NA	NA	NA	NA	NA	NA	NA	NA	NA	NA	NA	NA	NA	NA	NA	198	NA	NA	174	9.13	0	2	0.04504
CRC	LB-CRC-29	LB-CRC-29-P-08	m	83	Plasma	III	B	R0	no	NA	Adenokarzinom	Colon ascendens	NA			after	remission	post_chemo_1	Surgery	Chemo	426	0	NA	NA	19	NA	NA	NA	NA	NA	NA	NA	NA	NA	NA	NA	NA	NA	NA	NA	NA	198	NA	NA	170	2.0208	0.0272	3.17	0.04764
CRC	LB-CRC-29	LB-CRC-29-P-09	m	83	Plasma	III	B	R0	no	NA	Adenokarzinom	Colon ascendens	NA			after	remission	post_chemo_1	Surgery	Chemo	544	0	NA	NA	19	NA	NA	NA	NA	NA	NA	NA	NA	NA	NA	NA	NA	NA	NA	NA	NA	198	NA	NA	169	5.52171	0	2	0.04794
CRC	LB-CRC-31	LB-CRC-31-P-01	m	74	Plasma	II	A	R0	yes	MSS	Adenokarzinom	Colon Transversum	NA	MRD		before	diagnosis	baseline	Surgery	NA	0	0	NA	NA	NA	NA	NA	NA	NA	NA	NA	NA	NA	NA	NA	NA	NA	NA	NA	NA	NA	NA	NA	NA	170	2.38292	0.02192	1.953	0.0392
CRC	LB-CRC-31	LB-CRC-31-P-02	m	74	Plasma	II	A	R0	no	MSS	Adenokarzinom	Colon Transversum	NA	MRD		after	remission	post_surgery_1	Surgery	NA	5	0	NA	NA	NA	NA	NA	NA	NA	NA	NA	NA	NA	NA	NA	NA	NA	NA	NA	NA	NA	NA	NA	NA	160	25.2008	0	2.001	0.03273
CRC	LB-CRC-32	LB-CRC-32-P-01	f	73	Plasma	IV		R1	yes	MSS	Adenokarzinom	Rectum	Liver			before	diagnosis	baseline	NA	Chemo	0	NA	NA	NA	0	NA	NA	NA	0	NA	NA	NA	NA	187	321	492	NA	NA	NA	NA	NA	NA	NA	NA	161	57.34	0.701	2.131	0.3016
CRC	LB-CRC-32	LB-CRC-32-P-02	f	73	Plasma	IV		R1	yes	MSS	Adenokarzinom	Rectum	Liver			before	therapy	pal_chemo	NA	Chemo	5	NA	NA	NA	0	NA	NA	NA	0	NA	NA	NA	NA	187	321	492	NA	NA	NA	NA	NA	NA	NA	NA	166	47.46	0.5579	2.184	0.6917
CRC	LB-CRC-32	LB-CRC-32-P-03	f	73	Plasma	IV		R1	yes	MSS	Adenokarzinom	Rectum	Liver			before	therapy	pal_chemo	NA	Chemo	20	NA	NA	NA	0	NA	NA	NA	0	NA	NA	NA	NA	187	321	492	NA	NA	NA	NA	NA	NA	NA	NA	166	67.31	0.6367	2.147	0.712
CRC	LB-CRC-32	LB-CRC-32-P-04	f	73	Plasma	IV		R1	yes	MSS	Adenokarzinom	Rectum	Liver			before	therapy	pal_chemo	NA	Chemo	34	NA	NA	NA	0	NA	NA	NA	0	NA	NA	NA	NA	187	321	492	NA	NA	NA	NA	NA	NA	NA	NA	164	16.3	0.1605	2.185	0.2263
CRC	LB-CRC-32	LB-CRC-32-P-08	f	73	Plasma	IV		R1	yes	MSS	Adenokarzinom	Rectum	Liver			before	therapy	pal_chemo	NA	Chemo	104	NA	NA	NA	0	NA	NA	NA	0	NA	NA	NA	NA	187	321	492	NA	NA	NA	NA	NA	NA	NA	NA	156	18.47	0	2	0.03637
CRC	LB-CRC-32	LB-CRC-32-P-09	f	73	Plasma	IV		R1	yes	MSS	Adenokarzinom	Rectum	Liver			before	therapy	pal_chemo	NA	Chemo	132	NA	NA	NA	0	NA	NA	NA	0	NA	NA	NA	NA	187	321	492	NA	NA	NA	NA	NA	NA	NA	NA	168	13.57	0	1.998	0.03796
CRC	LB-CRC-32	LB-CRC-32-P-10	f	73	Plasma	IV		R1	yes	MSS	Adenokarzinom	Rectum	Liver			before	therapy	pal_chemo	NA	Chemo	174	NA	NA	NA	0	NA	NA	NA	0	NA	NA	NA	NA	187	321	492	NA	NA	NA	NA	NA	NA	NA	NA	177	31.66	0	1.999	0.03924
CRC	LB-CRC-32	LB-CRC-32-P-11	f	73	Plasma	IV		R1	yes	MSS	Adenokarzinom	Rectum	Liver			before	partial_remission	pal_chemo	NA	Chemo	188	NA	NA	NA	0	NA	NA	NA	0	NA	NA	NA	NA	187	321	492	NA	NA	NA	NA	NA	NA	NA	NA	171	18.8	0	1.998	0.0327
CRC	LB-CRC-32	LB-CRC-32-P-12	f	73	Plasma	IV		R1	yes	MSS	Adenokarzinom	Rectum	Liver			before	partial_remission	pal_chemo	NA	Chemo	195	NA	NA	NA	0	NA	NA	NA	0	NA	NA	NA	NA	187	321	492	NA	NA	NA	NA	NA	NA	NA	NA	180	24.61	0	2.018	0
CRC	LB-CRC-32	LB-CRC-32-P-15	f	73	Plasma	IV		R1	yes	MSS	Adenokarzinom	Rectum	Liver			before	partial_remission	pal_chemo	NA	Chemo	265	NA	NA	NA	0	NA	NA	NA	0	NA	NA	NA	NA	187	321	492	NA	NA	NA	NA	NA	NA	NA	NA	169	20.55	0.04346	2	0
CRC	LB-CRC-32	LB-CRC-32-P-16	f	73	Plasma	IV		R1	yes	MSS	Adenokarzinom	Rectum	Liver			before	partial_remission	pal_chemo	NA	Chemo	279	NA	NA	NA	0	NA	NA	NA	0	NA	NA	NA	NA	187	321	492	NA	NA	NA	NA	NA	NA	NA	NA	173	18.91	0	1.995	0.04085
CRC	LB-CRC-32	LB-CRC-32-P-17	f	73	Plasma	IV		R1	yes	MSS	Adenokarzinom	Rectum	Liver			before	partial_remission	pal_chemo	NA	Chemo	258	NA	NA	NA	0	NA	NA	NA	0	NA	NA	NA	NA	187	321	492	NA	NA	NA	NA	NA	NA	NA	NA	168	6.572	0	1.998	0.02781
CRC	LB-CRC-32	LB-CRC-32-P-18	f	73	Plasma	IV		R1	yes	MSS	Adenokarzinom	Rectum	Liver			before	partial_remission	pal_chemo	NA	Chemo	272	NA	NA	NA	0	NA	NA	NA	0	NA	NA	NA	NA	187	321	492	NA	NA	NA	NA	NA	NA	NA	NA	167	3.7848	0	2.004	0
CRC	LB-CRC-32	LB-CRC-32-P-19	f	73	Plasma	IV		R1	yes	MSS	Adenokarzinom	Rectum	Liver			before	partial_remission	pal_chemo	NA	Chemo	286	NA	NA	NA	0	NA	NA	NA	0	NA	NA	NA	NA	187	321	492	NA	NA	NA	NA	NA	NA	NA	NA	167	5.8808	0	1.998	0.03658
CRC	LB-CRC-32	LB-CRC-32-P-20	f	73	Plasma	IV		R1	yes	MSS	Adenokarzinom	Rectum	Liver			before	partial_remission	pal_chemo	NA	Chemo	301	NA	NA	NA	0	NA	NA	NA	0	NA	NA	NA	NA	187	321	492	NA	NA	NA	NA	NA	NA	NA	NA	165	8.128	0.03902	2.072	0
CRC	LB-CRC-32	LB-CRC-32-P-21	f	73	Plasma	IV		R1	yes	MSS	Adenokarzinom	Rectum	Liver			before	partial_remission	pal_chemo	NA	Chemo	314	NA	NA	NA	0	NA	NA	NA	0	NA	NA	NA	NA	187	321	492	NA	NA	NA	NA	NA	NA	NA	NA	169	8.0504	0	1.999	0
CRC	LB-CRC-32	LB-CRC-32-P-22	f	73	Plasma	IV		R1	yes	MSS	Adenokarzinom	Rectum	Liver			before	stable_disease	pal_chemo	NA	Chemo	328	NA	NA	NA	0	NA	NA	NA	0	NA	NA	NA	NA	187	321	492	NA	NA	NA	NA	NA	NA	NA	NA	166	7.024	0	1.998	0
CRC	LB-CRC-32	LB-CRC-32-P-23	f	73	Plasma	IV		R1	yes	MSS	Adenokarzinom	Rectum	Liver			before	stable_disease	pal_chemo	NA	Chemo	342	NA	NA	NA	0	NA	NA	NA	0	NA	NA	NA	NA	187	321	492	NA	NA	NA	NA	NA	NA	NA	NA	166	7.7656	0	1.983	0.03927
CRC	LB-CRC-32	LB-CRC-32-P-24	f	73	Plasma	IV		R1	yes	MSS	Adenokarzinom	Rectum	Liver			before	stable_disease	pal_chemo	NA	Chemo	370	NA	NA	NA	0	NA	NA	NA	0	NA	NA	NA	NA	187	321	492	NA	NA	NA	NA	NA	NA	NA	NA	170	6.1736	0.07119	3.011	0.03365
CRC	LB-CRC-32	LB-CRC-32-P-25	f	73	Plasma	IV		R1	yes	MSS	Adenokarzinom	Rectum	Liver			before	stable_disease	pal_chemo	NA	Chemo	398	NA	NA	NA	0	NA	NA	NA	0	NA	NA	NA	NA	187	321	492	NA	NA	NA	NA	NA	NA	NA	NA	163	9.2744	0.05372	2.858	0.05579
CRC	LB-CRC-32	LB-CRC-32-P-26	f	73	Plasma	IV		R1	yes	MSS	Adenokarzinom	Rectum	Liver			before	stable_disease	pal_chemo	NA	Chemo	414	NA	NA	NA	0	NA	NA	NA	0	NA	NA	NA	NA	187	321	492	NA	NA	NA	NA	NA	NA	NA	NA	167	11.4848	0.03829	2.045	0.04894
CRC	LB-CRC-32	LB-CRC-32-P-27	f	73	Plasma	IV		R1	yes	MSS	Adenokarzinom	Rectum	Liver			before	stable_disease	pal_chemo	NA	Chemo	482	NA	NA	NA	0	NA	NA	NA	0	NA	NA	NA	NA	187	321	492	NA	NA	NA	NA	NA	NA	NA	NA	168	3.6656	0.1151	2.148	0.1952
CRC	LB-CRC-32	LB-CRC-32-P-28	f	73	Plasma	IV		R1	yes	MSS	Adenokarzinom	Rectum	Liver			before	progressive_disease	pal_chemo	NA	Chemo	495	NA	NA	NA	0	NA	NA	NA	0	NA	NA	NA	NA	187	321	492	NA	NA	NA	NA	NA	NA	NA	NA	163	10.9477	0.09946	2.207	0.1891
CRC	LB-CRC-33	LB-CRC-33-P-01	f	55	Plasma	I	NA	R0	yes	NA	Adenokarzinom	Rectum	NA			before	diagnosis	baseline	Surgery	NA	0	0	NA	NA	NA	NA	NA	NA	NA	NA	NA	NA	NA	NA	NA	NA	NA	NA	NA	NA	NA	NA	NA	NA	172	2.66733	0.02547	1.833	0.03325
CRC	LB-CRC-34	LB-CRC-34-P-01	m	63	Plasma	IV		R1	yes	MSS	Adenokarzinom	Rectum	Liver, Lung			before	diagnosis	baseline	NA	Chemo	0	NA	NA	NA	NA	231	286	NA	0	NA	NA	NA	NA	68	169	286	NA	NA	NA	NA	NA	188	344	372	157	140.92	0.4185	2.144	0.4374
CRC	LB-CRC-34	LB-CRC-34-P-02	m	63	Plasma	IV		R1	yes	MSS	Adenokarzinom	Rectum	Liver, Lung			during	therapy	pal_chemo	NA	Chemo	14	NA	NA	NA	NA	231	286	NA	0	NA	NA	NA	NA	68	169	286	NA	NA	NA	NA	NA	188	344	372	165	52.3312	0.4309	2.128	0.4633
CRC	LB-CRC-34	LB-CRC-34-P-03	m	63	Plasma	IV		R1	yes	MSS	Adenokarzinom	Rectum	Liver, Lung			during	therapy	pal_chemo	NA	Chemo	28	NA	NA	NA	NA	231	286	NA	0	NA	NA	NA	NA	68	169	286	NA	NA	NA	NA	NA	188	344	372	167	3.885	0.04052	3.055	0.03685
CRC	LB-CRC-34	LB-CRC-34-P-04	m	63	Plasma	IV		R1	yes	MSS	Adenokarzinom	Rectum	Liver, Lung			during	therapy	pal_chemo	NA	Chemo	56	NA	NA	NA	NA	231	286	NA	0	NA	NA	NA	NA	68	169	286	NA	NA	NA	NA	NA	188	344	372	168	7.8104	0	2	0
CRC	LB-CRC-34	LB-CRC-34-P-05	m	63	Plasma	IV		R1	yes	MSS	Adenokarzinom	Rectum	Liver, Lung			during	partial_remission	pal_chemo	NA	Chemo	112	NA	NA	NA	NA	231	286	NA	0	NA	NA	NA	NA	68	169	286	NA	NA	NA	NA	NA	188	344	372	168	5.45314	0	2	0
CRC	LB-CRC-34	LB-CRC-34-P-06	m	63	Plasma	IV		R1	yes	MSS	Adenokarzinom	Rectum	Liver, Lung			during	partial_remission	pal_chemo	NA	Chemo	140	NA	NA	NA	NA	231	286	NA	0	NA	NA	NA	NA	68	169	286	NA	NA	NA	NA	NA	188	344	372	168	9.3168	0	2	0.03917
CRC	LB-CRC-34	LB-CRC-34-P-07	m	63	Plasma	IV		R1	yes	MSS	Adenokarzinom	Rectum	Liver, Lung			during	partial_remission	pal_chemo	NA	Chemo	151	NA	NA	NA	NA	231	286	NA	0	NA	NA	NA	NA	68	169	286	NA	NA	NA	NA	NA	188	344	372	169	7.683	0	2	0
CRC	LB-CRC-34	LB-CRC-34-P-08	m	63	Plasma	IV		R1	yes	MSS	Adenokarzinom	Rectum	Liver, Lung			during	partial_remission	pal_chemo	NA	Chemo	167	NA	NA	NA	NA	231	286	NA	0	NA	NA	NA	NA	68	169	286	NA	NA	NA	NA	NA	188	344	372	172	9.914	0	2.005	0
CRC	LB-CRC-34	LB-CRC-34-P-09	m	63	Plasma	IV		R1	yes	MSS	Adenokarzinom	Rectum	Liver, Lung			during	stable_disease	post_chemo_1	NA	Chemo	210	NA	NA	NA	NA	231	286	NA	0	NA	NA	NA	NA	68	169	286	NA	NA	NA	NA	NA	188	344	372	166	15.4234	0.2117	2.071	0.3073
CRC	LB-CRC-34	LB-CRC-34-P-10	m	63	Plasma	IV		R1	yes	MSS	Adenokarzinom	Rectum	Liver, Lung			during	stable_disease	post_chemo_1	NA	Chemo	231	NA	NA	NA	NA	231	286	NA	0	NA	NA	NA	NA	68	169	286	NA	NA	NA	NA	NA	188	344	372	165	28.254	0.3438	2.127	0.4262
CRC	LB-CRC-34	LB-CRC-34-P-11	m	63	Plasma	IV		R1	yes	MSS	Adenokarzinom	Rectum	Liver, Lung			during	stable_disease	chemo_2	NA	Chemo	245	NA	NA	NA	NA	231	286	NA	0	NA	NA	NA	NA	68	169	286	NA	NA	NA	NA	NA	188	344	372	172	5.07867	0.04468	2.887	0.04166
CRC	LB-CRC-34	LB-CRC-34-P-12	m	63	Plasma	IV		R1	yes	MSS	Adenokarzinom	Rectum	Liver, Lung			during	stable_disease	chemo_2	NA	Chemo	259	NA	NA	NA	NA	231	286	NA	0	NA	NA	NA	NA	68	169	286	NA	NA	NA	NA	NA	188	344	372	172	2.239	0.0472	2.104	0.05735
CRC	LB-CRC-34	LB-CRC-34-P-13	m	63	Plasma	IV		R1	yes	MSS	Adenokarzinom	Rectum	Liver, Lung			during	stable_disease	chemo_2	NA	Chemo	273	NA	NA	NA	NA	231	286	NA	0	NA	NA	NA	NA	68	169	286	NA	NA	NA	NA	NA	188	344	372	167	6.5352	0.06551	1.994	0.08763
CRC	LB-CRC-34	LB-CRC-34-P-14	m	63	Plasma	IV		R1	yes	MSS	Adenokarzinom	Rectum	Liver, Lung			during	progressive_disease	chemo_2	NA	Chemo	287	NA	NA	NA	NA	231	286	NA	0	NA	NA	NA	NA	68	169	286	NA	NA	NA	NA	NA	188	344	372	172	5.61138	0.04083	2.135	0.08421
CRC	LB-CRC-34	LB-CRC-34-P-15	m	63	Plasma	IV		R1	yes	MSS	Adenokarzinom	Rectum	Liver, Lung			during	progressive_disease	chemo_3	NA	Chemo	315	NA	NA	NA	NA	231	286	NA	0	NA	NA	NA	NA	68	169	286	NA	NA	NA	NA	NA	188	344	372	171	3.846	0.1009	2.08	0.1874
CRC	LB-CRC-35	LB-CRC-35-P-01	m	48	Plasma	III		R0	yes	MSS	Adenokarzinom	Rectum	NA			before	diagnosis	baseline	Surgery	Chemo	0	119	NA	NA	0	146	NA	NA	NA	NA	NA	NA	273	NA	NA	NA	NA	NA	NA	0	NA	45	238	NA	171	7.7	0.1176	2.638	0.1982
CRC	LB-CRC-35	LB-CRC-35-P-02	m	48	Plasma	III		R0	no	MSS	Adenokarzinom	Rectum	NA			during	therapy	post_surgery_1	Surgery	Chemo	146	119	NA	NA	0	146	NA	NA	NA	NA	NA	NA	273	NA	NA	NA	NA	NA	NA	0	NA	45	238	NA	168	4.5176	0	2.002	0
CRC	LB-CRC-35	LB-CRC-35-P-03	m	48	Plasma	III		R0	no	MSS	Adenokarzinom	Rectum	NA			during	therapy	chemo_2	Surgery	Chemo	192	119	NA	NA	0	146	NA	NA	NA	NA	NA	NA	273	NA	NA	NA	NA	NA	NA	0	NA	45	238	NA	175	1.52945	0.03123	2.062	0.04215
CRC	LB-CRC-35	LB-CRC-35-P-04	m	48	Plasma	III		R0	no	MSS	Adenokarzinom	Rectum	NA			during	therapy	chemo_2	Surgery	Chemo	226	119	NA	NA	0	146	NA	NA	NA	NA	NA	NA	273	NA	NA	NA	NA	NA	NA	0	NA	45	238	NA	172	1.9056	0	1.999	0.03764
CRC	LB-CRC-35	LB-CRC-35-P-05	m	48	Plasma	III		R0	no	MSS	Adenokarzinom	Rectum	NA			after	remission	post_chemo_2	Surgery	Chemo	325	119	NA	NA	0	146	NA	NA	NA	NA	NA	NA	273	NA	NA	NA	NA	NA	NA	0	NA	45	238	NA	172	1.3632	0	2.001	0.02897
CRC	LB-CRC-35	LB-CRC-35-P-06	m	48	Plasma	III		R0	no	MSS	Adenokarzinom	Rectum	NA			after	remission	post_chemo_2	Surgery	Chemo	329	119	NA	NA	0	146	NA	NA	NA	NA	NA	NA	273	NA	NA	NA	NA	NA	NA	0	NA	45	238	NA	173	1.596	0	2.001	0.02241
CRC	LB-CRC-35	LB-CRC-35-P-07	m	48	Plasma	III		R0	no	MSS	Adenokarzinom	Rectum	NA			after	remission	post_chemo_2	Surgery	Chemo	423	119	NA	NA	0	146	NA	NA	NA	NA	NA	NA	273	NA	NA	NA	NA	NA	NA	0	NA	45	238	NA	169	2.079	0	2.001	0.04006
CRC	LB-CRC-36	LB-CRC-36-P-01	f	78	Plasma	IV	A	R0	yes	MSI	Adenokarzinom	Coecum	Liver	MRD		before	diagnosis	baseline	Surgery	NA	-1	0	NA	NA	NA	NA	NA	NA	NA	NA	NA	NA	NA	NA	NA	NA	NA	NA	NA	NA	NA	NA	NA	NA	166	19.45	0	1.998	0.09126
CRC	LB-CRC-36	LB-CRC-36-P-02	f	78	Plasma	IV	A	R0	no	MSI	Adenokarzinom	Coecum	Liver	MRD		after	therapy	post_surgery_1	Surgery	NA	6	0	NA	NA	NA	NA	NA	NA	NA	NA	NA	NA	NA	NA	NA	NA	NA	NA	NA	NA	NA	NA	NA	NA	169	48.9824	0.049	2.123	0.05887
CRC	LB-CRC-38	LB-CRC-38-P-01	m	69	Plasma	IV	C	NA	yes	NA	Adenokarzinom	Coecum, Colon ascendens	Peritoneum	MRD		after	diagnosis	baseline	Surgery	Chemo	-1	0	NA	NA	NA	NA	NA	NA	29	NA	NA	NA	NA	NA	120	NA	NA	NA	NA	NA	NA	NA	NA	NA	161	20.1	0.03921	1.961	0.03002
CRC	LB-CRC-38	LB-CRC-38-P-02	m	69	Plasma	IV	C	NA	yes	NA	Adenokarzinom	Coecum, Colon ascendens	Peritoneum	MRD		after	therapy	post_surgery_1	Surgery	Chemo	5	0	NA	NA	NA	NA	NA	NA	29	NA	NA	NA	NA	NA	120	NA	NA	NA	NA	NA	NA	NA	NA	NA	168	47.5	0.0495	1.879	0.05796
CRC	LB-CRC-38	LB-CRC-38-P-03	m	69	Plasma	IV	C	NA	yes	NA	Adenokarzinom	Coecum, Colon ascendens	Peritoneum	MRD		after	therapy	post_surgery_1	Surgery	Chemo	29	0	NA	NA	NA	NA	NA	NA	29	NA	NA	NA	NA	NA	120	NA	NA	NA	NA	NA	NA	NA	NA	NA	163	49.55	0.04661	2.053	0.08446
CRC	LB-CRC-38	LB-CRC-38-P-04	m	69	Plasma	IV	C	NA	yes	NA	Adenokarzinom	Coecum, Colon ascendens	Peritoneum	MRD		after	therapy	pal_chemo	Surgery	Chemo	85	0	NA	NA	NA	NA	NA	NA	29	NA	NA	NA	NA	NA	120	NA	NA	NA	NA	NA	NA	NA	NA	NA	177	172.54	0	2	0
CRC	LB-CRC-38	LB-CRC-38-P-05	m	69	Plasma	IV	C	NA	yes	NA	Adenokarzinom	Coecum, Colon ascendens	Peritoneum	MRD		after	stable_disease	pal_chemo	Surgery	Chemo	139	0	NA	NA	NA	NA	NA	NA	29	NA	NA	NA	NA	NA	120	NA	NA	NA	NA	NA	NA	NA	NA	NA	171	39.13	0.0487	2.941	0.04065
CRC	LB-CRC-38	LB-CRC-38-P-06	m	69	Plasma	IV	C	NA	yes	NA	Adenokarzinom	Coecum, Colon ascendens	Peritoneum	MRD		after	stable_disease	pal_chemo	Surgery	Chemo	159	0	NA	NA	NA	NA	NA	NA	29	NA	NA	NA	NA	NA	120	NA	NA	NA	NA	NA	NA	NA	NA	NA	168	30.25	0	2.001	0
CRC	LB-CRC-38	LB-CRC-38-P-07	m	69	Plasma	IV	C	NA	yes	NA	Adenokarzinom	Coecum, Colon ascendens	Peritoneum	MRD		after	stable_disease	pal_chemo	Surgery	Chemo	183	0	NA	NA	NA	NA	NA	NA	29	NA	NA	NA	NA	NA	120	NA	NA	NA	NA	NA	NA	NA	NA	NA	168	30.28	0.04328	1.991	0.03266
CRC	LB-CRC-38	LB-CRC-38-P-08	m	69	Plasma	IV	C	NA	yes	NA	Adenokarzinom	Coecum, Colon ascendens	Peritoneum	MRD		after	stable_disease	pal_chemo	Surgery	Chemo	211	0	NA	NA	NA	NA	NA	NA	29	NA	NA	NA	NA	NA	120	NA	NA	NA	NA	NA	NA	NA	NA	NA	172	33.83	0	2	0
CRC	LB-CRC-38	LB-CRC-38-P-09	m	69	Plasma	IV	C	NA	yes	NA	Adenokarzinom	Coecum, Colon ascendens	Peritoneum	MRD		after	stable_disease	pal_chemo	Surgery	Chemo	230	0	NA	NA	NA	NA	NA	NA	29	NA	NA	NA	NA	NA	120	NA	NA	NA	NA	NA	NA	NA	NA	NA	167	20.118	0	1.999	0.02182
CRC	LB-CRC-38	LB-CRC-38-P-10	m	69	Plasma	IV	C	NA	yes	NA	Adenokarzinom	Coecum, Colon ascendens	Peritoneum	MRD		after	stable_disease	pal_chemo	Surgery	Chemo	247	0	NA	NA	NA	NA	NA	NA	29	NA	NA	NA	NA	NA	120	NA	NA	NA	NA	NA	NA	NA	NA	NA	165	17.44	0	1.998	0.03343
CRC	LB-CRC-38	LB-CRC-38-P-11	m	69	Plasma	IV	C	NA	yes	NA	Adenokarzinom	Coecum, Colon ascendens	Peritoneum	MRD		after	stable_disease	pal_chemo	Surgery	Chemo	288	0	NA	NA	NA	NA	NA	NA	29	NA	NA	NA	NA	NA	120	NA	NA	NA	NA	NA	NA	NA	NA	NA	168	15.411	0	1.998	0.02886
CRC	LB-CRC-38	LB-CRC-38-P-12	m	69	Plasma	IV	C	NA	yes	NA	Adenokarzinom	Coecum, Colon ascendens	Peritoneum	MRD		after	stable_disease	pal_chemo	Surgery	Chemo	313	0	NA	NA	NA	NA	NA	NA	29	NA	NA	NA	NA	NA	120	NA	NA	NA	NA	NA	NA	NA	NA	NA	168	15.4509	0	1.999	0
CRC	LB-CRC-38	LB-CRC-38-P-13	m	69	Plasma	IV	C	NA	yes	NA	Adenokarzinom	Coecum, Colon ascendens	Peritoneum	MRD		after	stable_disease	pal_chemo	Surgery	Chemo	345	0	NA	NA	NA	NA	NA	NA	29	NA	NA	NA	NA	NA	120	NA	NA	NA	NA	NA	NA	NA	NA	NA	173	4.51527	0.04174	2.145	0.0658
CRC	LB-CRC-38	LB-CRC-38-P-14	m	69	Plasma	IV	C	NA	yes	NA	Adenokarzinom	Coecum, Colon ascendens	Peritoneum	MRD		after	stable_disease	pal_chemo	Surgery	Chemo	373	0	NA	NA	NA	NA	NA	NA	29	NA	NA	NA	NA	NA	120	NA	NA	NA	NA	NA	NA	NA	NA	NA	170	7.243	0	1.998	0
CRC	LB-CRC-38	LB-CRC-38-P-15	m	69	Plasma	IV	C	NA	yes	NA	Adenokarzinom	Coecum, Colon ascendens	Peritoneum	MRD		after	stable_disease	pal_chemo	Surgery	Chemo	421	0	NA	NA	NA	NA	NA	NA	29	NA	NA	NA	NA	NA	120	NA	NA	NA	NA	NA	NA	NA	NA	NA	169	5.602	0	2.001	0
CRC	LB-CRC-38	LB-CRC-38-P-16	m	69	Plasma	IV	C	NA	yes	NA	Adenokarzinom	Coecum, Colon ascendens	Peritoneum	MRD		after	stable_disease	pal_chemo	Surgery	Chemo	447	0	NA	NA	NA	NA	NA	NA	29	NA	NA	NA	NA	NA	120	NA	NA	NA	NA	NA	NA	NA	NA	NA	171	2.892	0	1.999	0.0439
CRC	LB-CRC-42	LB-CRC-42-P-01	m	83	Plasma	I		R0	yes	NA	Adenokarzinom	Sigma	Liver, Lung	MRD		before	diagnosis	baseline	Surgery	NA	-1	0	NA	NA	NA	NA	NA	NA	NA	NA	NA	NA	NA	NA	NA	NA	NA	NA	NA	NA	NA	NA	NA	NA	171	1.25782	0.05121	2.804	0.03923
CRC	LB-CRC-42	LB-CRC-42-P-02	m	83	Plasma	I		R0	no	NA	Adenokarzinom	Sigma	Liver, Lung	MRD		after	remission	post_surgery_1	Surgery	NA	5	0	NA	NA	NA	NA	NA	NA	NA	NA	NA	NA	NA	NA	NA	NA	NA	NA	NA	NA	NA	NA	NA	NA	164	29.704	0	1.997	0
CRC	LB-CRC-42	LB-CRC-42-P-03	m	83	Plasma	I		R0	no	NA	Adenokarzinom	Sigma	Liver, Lung	MRD		after	remission	post_surgery_1	Surgery	NA	39	0	NA	NA	NA	NA	NA	NA	NA	NA	NA	NA	NA	NA	NA	NA	NA	NA	NA	NA	NA	NA	NA	NA	174	1.56873	0.04791	1.983	0.05284
CRC	LB-CRC-43	LB-CRC-43-P-02	f	70	Plasma	IV	A	NA	yes	MSS	Adenokarzinom	Sigma	Liver, Lung			during	therapy	pal_chemo	Surgery	Chemo	26	97	130	352	0	272	NA	NA	0	NA	NA	NA	NA	70	333	255	NA	NA	NA	102	128	58	392	NA	172	10.17	0	2	0
CRC	LB-CRC-43	LB-CRC-43-P-03	f	70	Plasma	IV	A	NA	yes	MSS	Adenokarzinom	Sigma	Liver, Lung			during	therapy	pal_chemo	Surgery	Chemo	55	97	130	352	0	272	NA	NA	0	NA	NA	NA	NA	70	333	255	NA	NA	NA	102	128	58	392	NA	166	56.87	0	2	0
CRC	LB-CRC-43	LB-CRC-43-P-05	f	70	Plasma	IV	A	NA	yes	MSS	Adenokarzinom	Sigma	Liver, Lung			during	partial_remission	radiation	Surgery	Chemo	110	97	130	352	0	272	NA	NA	0	NA	NA	NA	NA	70	333	255	NA	NA	NA	102	128	58	392	NA	169	92.57	0	2	0
CRC	LB-CRC-43	LB-CRC-43-P-06	f	70	Plasma	IV	A	NA	yes	MSS	Adenokarzinom	Sigma	Liver, Lung			during	partial_remission	post_surgery_2	Surgery	Chemo	160	97	130	352	0	272	NA	NA	0	NA	NA	NA	NA	70	333	255	NA	NA	NA	102	128	58	392	NA	171	5.07867	0.03947	2.043	0.04359
CRC	LB-CRC-43	LB-CRC-43-P-07	f	70	Plasma	IV	A	NA	yes	MSS	Adenokarzinom	Sigma	Liver, Lung			during	partial_remission	post_surgery_2	Surgery	Chemo	201	97	130	352	0	272	NA	NA	0	NA	NA	NA	NA	70	333	255	NA	NA	NA	102	128	58	392	NA	171	5.52646	0.03133	2.09	0.04703
CRC	LB-CRC-43	LB-CRC-43-P-08	f	70	Plasma	IV	A	NA	yes	MSS	Adenokarzinom	Sigma	Liver, Lung			during	progressive_disease	chemo_2	Surgery	Chemo	278	97	130	352	0	272	NA	NA	0	NA	NA	NA	NA	70	333	255	NA	NA	NA	102	128	58	392	NA	167	3.96277	0.05052	1.98	0.08658
CRC	LB-CRC-43	LB-CRC-43-P-09	f	70	Plasma	IV	A	NA	yes	MSS	Adenokarzinom	Sigma	Liver, Lung			during	progressive_disease	chemo_2	Surgery	Chemo	313	97	130	352	0	272	NA	NA	0	NA	NA	NA	NA	70	333	255	NA	NA	NA	102	128	58	392	NA	169	6.0176	0.03106	2.062	0.02838
CRC	LB-CRC-43	LB-CRC-43-P-10	f	70	Plasma	IV	A	NA	yes	MSS	Adenokarzinom	Sigma	Liver, Lung			during	stable_disease	chemo_2	Surgery	Chemo	342	97	130	352	0	272	NA	NA	0	NA	NA	NA	NA	70	333	255	NA	NA	NA	102	128	58	392	NA	167	9.3944	0	2	0.02897
CRC	LB-CRC-44	LB-CRC-44-P-01	f	78	Plasma	III	B	R0	yes	NA	Adenokarzinom	rechte Kolonflexur	NA	MRD		before	diagnosis	baseline	Surgery	NA	0	0	NA	NA	NA	NA	NA	NA	NA	NA	NA	NA	NA	NA	NA	NA	NA	NA	NA	NA	NA	NA	NA	NA	169	2.368	0.03373	2.041	0.04285
CRC	LB-CRC-44	LB-CRC-44-P-02	f	78	Plasma	III	B	R0	no	NA	Adenokarzinom	rechte Kolonflexur	NA	MRD		after	remission	post_surgery_1	Surgery	NA	8	0	NA	NA	NA	NA	NA	NA	NA	NA	NA	NA	NA	NA	NA	NA	NA	NA	NA	NA	NA	NA	NA	NA	164	9.7196	0	2	0.04163
CRC	LB-CRC-45	LB-CRC-45-P-01	m	46	Plasma	I	NA	NA	yes	NA	Adenokarzinom	Rectum	NA	MRD		during	therapy	baseline	Surgery	Chemo	-5	0	NA	NA	-74	NA	NA	NA	NA	NA	NA	NA	NA	NA	NA	NA	NA	NA	NA	-74	NA	NA	NA	NA	171	0.6064	0.03298	1.997	0
CRC	LB-CRC-45	LB-CRC-45-P-02	m	46	Plasma	I	NA	NA	no	NA	Adenokarzinom	Rectum	NA	MRD		after	remission	post_surgery_1	Surgery	Chemo	6	0	NA	NA	-74	NA	NA	NA	NA	NA	NA	NA	NA	NA	NA	NA	NA	NA	NA	-74	NA	NA	NA	NA	167	1.2328	0.0356	1.971	0.03042
CRC	LB-CRC-46	LB-CRC-46-P-01	m	78	Plasma	IV	A	R0 (lokal)	yes	MSS	Adenokarzinom	Colon ascendens	Liver	MRD		during	therapy	baseline	Surgery	Chemo	-1	0	NA	NA	-75	NA	NA	NA	NA	NA	NA	154	NA	NA	NA	NA	NA	NA	NA	NA	NA	-75	NA	NA	169	4.18971	0.04165	2.035	0.05174
CRC	LB-CRC-46	LB-CRC-46-P-02	m	78	Plasma	IV	A	R0 (lokal)	yes	MSS	Adenokarzinom	Colon ascendens	Liver	MRD		after	therapy	post_surgery_1	Surgery	Chemo	9	0	NA	NA	-75	NA	NA	NA	NA	NA	NA	154	NA	NA	NA	NA	NA	NA	NA	NA	NA	-75	NA	NA	174	58.679	0.03837	3.124	0.04298
CRC	LB-CRC-46	LB-CRC-46-P-03	m	78	Plasma	IV	A	R0 (lokal)	yes	MSS	Adenokarzinom	Colon ascendens	Liver	MRD		after	therapy	post_surgery_1	Surgery	Chemo	35	0	NA	NA	-75	NA	NA	NA	NA	NA	NA	154	NA	NA	NA	NA	NA	NA	NA	NA	NA	-75	NA	NA	170	2.312	0.05099	2.141	0.04151
CRC	LB-CRC-47	LB-CRC-47-P-01	m	74	Plasma	III		R0	yes	NA	Adenokarzinom	Sigma	NA	MRD		before	diagnosis	baseline	Surgery	Chemo	-7	0	NA	NA	26	NA	NA	NA	NA	NA	NA	NA	190	NA	NA	NA	NA	NA	NA	NA	NA	180	NA	NA	166	2.6896	0	1.999	0.02441
CRC	LB-CRC-47	LB-CRC-47-P-02	m	74	Plasma	III		R0	no	NA	Adenokarzinom	Sigma	NA	MRD		during	therapy	post_surgery_1	Surgery	Chemo	16	0	NA	NA	26	NA	NA	NA	NA	NA	NA	NA	190	NA	NA	NA	NA	NA	NA	NA	NA	180	NA	NA	167	6.5805	0.02764	1.963	0
CRC	LB-CRC-47	LB-CRC-47-P-03	m	74	Plasma	III		R0	no	NA	Adenokarzinom	Sigma	NA	MRD		during	therapy	chemo_1	Surgery	Chemo	28	0	NA	NA	26	NA	NA	NA	NA	NA	NA	NA	190	NA	NA	NA	NA	NA	NA	NA	NA	180	NA	NA	166	4.482	0	1.998	0.03302
CRC	LB-CRC-47	LB-CRC-47-P-04	m	74	Plasma	III		R0	no	NA	Adenokarzinom	Sigma	NA	MRD		during	therapy	chemo_1	Surgery	Chemo	50	0	NA	NA	26	NA	NA	NA	NA	NA	NA	NA	190	NA	NA	NA	NA	NA	NA	NA	NA	180	NA	NA	168	2.8288	0.03803	3.054	0.0377
CRC	LB-CRC-47	LB-CRC-47-P-05	m	74	Plasma	III		R0	no	NA	Adenokarzinom	Sigma	NA	MRD		during	therapy	chemo_1	Surgery	Chemo	72	0	NA	NA	26	NA	NA	NA	NA	NA	NA	NA	190	NA	NA	NA	NA	NA	NA	NA	NA	180	NA	NA	171	3.513	0	2.001	0.05677
CRC	LB-CRC-47	LB-CRC-47-P-06	m	74	Plasma	III		R0	no	NA	Adenokarzinom	Sigma	NA	MRD		during	therapy	chemo_1	Surgery	Chemo	83	0	NA	NA	26	NA	NA	NA	NA	NA	NA	NA	190	NA	NA	NA	NA	NA	NA	NA	NA	180	NA	NA	172	2.0508	0	2.003	0.03711
CRC	LB-CRC-47	LB-CRC-47-P-07	m	74	Plasma	III		R0	no	NA	Adenokarzinom	Sigma	NA	MRD		during	therapy	chemo_1	Surgery	Chemo	114	0	NA	NA	26	NA	NA	NA	NA	NA	NA	NA	190	NA	NA	NA	NA	NA	NA	NA	NA	180	NA	NA	173	2.46686	0	2	0.03968
CRC	LB-CRC-47	LB-CRC-47-P-08	m	74	Plasma	III		R0	no	NA	Adenokarzinom	Sigma	NA	MRD		during	therapy	chemo_1	Surgery	Chemo	142	0	NA	NA	26	NA	NA	NA	NA	NA	NA	NA	190	NA	NA	NA	NA	NA	NA	NA	NA	180	NA	NA	172	2.9952	0	2	0
CRC	LB-CRC-47	LB-CRC-47-P-09	m	74	Plasma	III		R0	no	NA	Adenokarzinom	Sigma	NA	MRD		during	therapy	chemo_1	Surgery	Chemo	177	0	NA	NA	26	NA	NA	NA	NA	NA	NA	NA	190	NA	NA	NA	NA	NA	NA	NA	NA	180	NA	NA	180	10.224	0.03078	1.939	0.02398
CRC	LB-CRC-47	LB-CRC-47-P-10	m	74	Plasma	III		R0	no	NA	Adenokarzinom	Sigma	NA	MRD		after	remission	post_chemo_1	Surgery	Chemo	226	0	NA	NA	26	NA	NA	NA	NA	NA	NA	NA	190	NA	NA	NA	NA	NA	NA	NA	NA	180	NA	NA	173	1.5684	0.0413	3.135	0.03879
CRC	LB-CRC-48	LB-CRC-48-P-01	m	71	Plasma	IV		R1	yes	MSI	Adenokarzinom	Rectum	Liver, Lung			before	diagnosis	baseline	NA	Chemo	-14	NA	NA	NA	0	NA	NA	30	0	NA	NA	NA	NA	NA	NA	7	30	NA	NA	7	22	13	NA	62	156	166.843	0.6596	1.992	0.6988
CRC	LB-CRC-48	LB-CRC-48-P-02	m	71	Plasma	IV		R1	yes	MSI	Adenokarzinom	Rectum	Liver, Lung			during	therapy	pal_chemo	NA	Chemo	2	NA	NA	NA	0	NA	NA	30	0	NA	NA	NA	NA	NA	NA	7	30	NA	NA	7	22	13	NA	62	163	917.68	0.6331	1.988	0.7004
CRC	LB-CRC-48	LB-CRC-48-P-03	m	71	Plasma	IV		R1	yes	MSI	Adenokarzinom	Rectum	Liver, Lung			during	progressive_disease	pal_chemo	NA	Chemo	11	NA	NA	NA	0	NA	NA	30	0	NA	NA	NA	NA	NA	NA	7	30	NA	NA	7	22	13	NA	62	162	442.338	0.6724	1.986	0.7594
CRC	LB-CRC-48	LB-CRC-48-P-04	m	71	Plasma	IV		R1	yes	MSI	Adenokarzinom	Rectum	Liver, Lung			during	progressive_disease	post_chemo_1	NA	Chemo	30	NA	NA	NA	0	NA	NA	30	0	NA	NA	NA	NA	NA	NA	7	30	NA	NA	7	22	13	NA	62	169	360.96	0.563	1.994	0.5852
CRC	LB-CRC-49	LB-CRC-49-P-01	f	78	Plasma	II	A	R0	yes	MSI-H	Adenokarzinom	Colon Transversum	NA	MRD		before	diagnosis	baseline	Surgery	NA	-1	0	NA	NA	NA	NA	NA	NA	NA	NA	NA	NA	NA	NA	NA	NA	NA	NA	NA	NA	NA	NA	NA	NA	166	6.31457	0.04944	2.005	0.04176
CRC	LB-CRC-49	LB-CRC-49-P-02	f	78	Plasma	II	A	R0	no	MSI-H	Adenokarzinom	Colon Transversum	NA	MRD		after	remission	post_surgery_1	Surgery	NA	20	0	NA	NA	NA	NA	NA	NA	NA	NA	NA	NA	NA	NA	NA	NA	NA	NA	NA	NA	NA	NA	NA	NA	168	3.2108	0.04083	2.095	0.05309
CRC	LB-CRC-50	LB-CRC-50-P-01	f	84	Plasma	I		R0	yes	NA	Adenokarzinom	Colon ascendens	NA	MRD		before	diagnosis	baseline	Surgery	NA	-1	0	NA	NA	NA	NA	NA	NA	NA	NA	NA	NA	NA	NA	NA	NA	NA	NA	NA	NA	NA	NA	NA	NA	171	5.748	0.03824	2.892	0.037
CRC	LB-CRC-50	LB-CRC-50-P-02	f	84	Plasma	I		R0	no	NA	Adenokarzinom	Colon ascendens	NA	MRD		after	remission	post_surgery_1	Surgery	NA	4	0	NA	NA	NA	NA	NA	NA	NA	NA	NA	NA	NA	NA	NA	NA	NA	NA	NA	NA	NA	NA	NA	NA	160	36.4128	0.05104	2.936	0.05056
CRC	LB-CRC-51	LB-CRC-51-P-01	f	78	Plasma	II	A	R0	yes	NA	Adenokarzinom	Sigma	NA	MRD		before	diagnosis	baseline	Surgery	NA	-3	0	NA	NA	NA	NA	NA	NA	NA	NA	NA	NA	NA	NA	NA	NA	NA	NA	NA	NA	NA	NA	NA	NA	168	0.9152	0.02903	2.964	0.02344
CRC	LB-CRC-51	LB-CRC-51-P-02	f	78	Plasma	II	A	R0	no	NA	Adenokarzinom	Sigma	NA	MRD		after	remission	post_surgery_1	Surgery	NA	8	0	NA	NA	NA	NA	NA	NA	NA	NA	NA	NA	NA	NA	NA	NA	NA	NA	NA	NA	NA	NA	NA	NA	171	5.59938	0	2	0.03046
CRC	LB-CRC-51	LB-CRC-51-P-03	f	78	Plasma	II	A	R0	no	NA	Adenokarzinom	Sigma	NA	MRD		after	remission	post_surgery_1	Surgery	NA	31	0	NA	NA	NA	NA	NA	NA	NA	NA	NA	NA	NA	NA	NA	NA	NA	NA	NA	NA	NA	NA	NA	NA	173	1.30629	0.06441	3.035	0.03968
CRC	LB-CRC-51	LB-CRC-51-P-04	f	78	Plasma	II	A	R0	no	NA	Adenokarzinom	Sigma	NA	MRD		after	remission	post_surgery_1	Surgery	NA	177	0	NA	NA	NA	NA	NA	NA	NA	NA	NA	NA	NA	NA	NA	NA	NA	NA	NA	NA	NA	NA	NA	NA	170	1.14267	0.05873	2.932	0.07027
CRC	LB-CRC-52	LB-CRC-52-P-01	m	58	Plasma	III	C	R0 (lokal)	yes	MSS	Adenokarzinom	Coecum	NA	MRD		before	diagnosis	baseline	Surgery	Chemo	-1	0	NA	NA	34	NA	NA	NA	NA	NA	NA	NA	NA	NA	NA	NA	NA	NA	NA	NA	NA	189	NA	NA	172	1.5344	0.0316	2.992	0.02703
CRC	LB-CRC-52	LB-CRC-52-P-02	m	58	Plasma	III	C	R0 (lokal)	no	MSS	Adenokarzinom	Coecum	NA	MRD		during	therapy	post_surgery_1	Surgery	Chemo	6	0	NA	NA	34	NA	NA	NA	NA	NA	NA	NA	NA	NA	NA	NA	NA	NA	NA	NA	NA	189	NA	NA	162	75.4145	0.04641	2.111	0.04634
CRC	LB-CRC-52	LB-CRC-52-P-03	m	58	Plasma	III	C	R0 (lokal)	no	MSS	Adenokarzinom	Coecum	NA	MRD		during	therapy	post_surgery_1	Surgery	Chemo	34	0	NA	NA	34	NA	NA	NA	NA	NA	NA	NA	NA	NA	NA	NA	NA	NA	NA	NA	NA	189	NA	NA	174	2.05754	0	1.996	0.03579
CRC	LB-CRC-52	LB-CRC-52-P-04	m	58	Plasma	III	C	R0 (lokal)	no	MSS	Adenokarzinom	Coecum	NA	MRD		during	therapy	chemo_1	Surgery	Chemo	147	0	NA	NA	34	NA	NA	NA	NA	NA	NA	NA	NA	NA	NA	NA	NA	NA	NA	NA	NA	189	NA	NA	171	7.49262	0.0412	2.888	0.04334
CRC	LB-CRC-52	LB-CRC-52-P-05	m	58	Plasma	III	C	R0 (lokal)	no	MSS	Adenokarzinom	Coecum	NA	MRD		during	therapy	chemo_1	Surgery	Chemo	175	0	NA	NA	34	NA	NA	NA	NA	NA	NA	NA	NA	NA	NA	NA	NA	NA	NA	NA	NA	189	NA	NA	168	5.511	0	1.996	0
CRC	LB-CRC-52	LB-CRC-52-P-06	m	58	Plasma	III	C	R0 (lokal)	no	MSS	Adenokarzinom	Coecum	NA	MRD		during	therapy	chemo_1	Surgery	Chemo	189	0	NA	NA	34	NA	NA	NA	NA	NA	NA	NA	NA	NA	NA	NA	NA	NA	NA	NA	NA	189	NA	NA	178	4.37952	0	1.998	0.02229
CRC	LB-CRC-53	LB-CRC-53-P-01	m	88	Plasma	III	C	R0	yes	NA	Adenokarzinom	Rectum	NA	MRD		during	therapy	baseline	Surgery	NA	0	0	NA	NA	NA	NA	NA	NA	NA	NA	NA	NA	NA	NA	NA	NA	NA	NA	NA	-11	NA	NA	NA	NA	169	4.71415	0.032	3.074	0.03377
CRC	LB-CRC-53	LB-CRC-53-P-02	m	88	Plasma	III	C	R0	no	NA	Adenokarzinom	Rectum	NA	MRD		after	remission	post_surgery_1	Surgery	NA	5	0	NA	NA	NA	NA	NA	NA	NA	NA	NA	NA	NA	NA	NA	NA	NA	NA	NA	-11	NA	NA	NA	NA	162	3.9565	0	1.999	0
CRC	LB-CRC-54	LB-CRC-54-P-01	f	56	Plasma	IV	B	NA	yes	MSS	Adenokarzinom	Rectum	NA			before	diagnosis	baseline	NA	Chemo	-5	NA	NA	NA	0	NA	NA	NA	NA	NA	NA	NA	NA	NA	NA	NA	NA	NA	NA	NA	NA	NA	NA	NA	174	5.298	0	2.003	0.04326
CRC	LB-CRC-54	LB-CRC-54-P-02	f	56	Plasma	IV	B	NA	yes	MSS	Adenokarzinom	Rectum	NA			during	therapy	chemo_1	NA	Chemo	35	NA	NA	NA	0	NA	NA	NA	NA	NA	NA	NA	NA	NA	NA	NA	NA	NA	NA	NA	NA	NA	NA	NA	171	3.9392	0	1.998	0.02804
CRC	LB-CRC-55	LB-CRC-55-P-01	m	73	Plasma	II	A	R0	yes	MSS	Adenokarzinom	linke Colonflexur	NA			before	diagnosis	baseline	Surgery	NA	-3	0	NA	NA	NA	NA	NA	NA	NA	NA	NA	NA	NA	NA	NA	NA	NA	NA	NA	NA	NA	NA	NA	NA	169	2.7724	0	1.996	0.04169
CRC	LB-CRC-56	LB-CRC-56-P-01	f	58	Plasma	I		R0	yes	MSS	Adenokarzinom	Colon ascendens	NA	MRD		before	diagnosis	baseline	Surgery	NA	-8	0	NA	NA	NA	NA	NA	NA	NA	NA	NA	NA	NA	NA	NA	NA	NA	NA	NA	NA	NA	NA	NA	NA	168	2.0232	0	1.999	0.0406
CRC	LB-CRC-56	LB-CRC-56-P-02	f	58	Plasma	I		R0	no	MSS	Adenokarzinom	Colon ascendens	NA	MRD		after	remission	post_surgery_1	Surgery	NA	28	0	NA	NA	NA	NA	NA	NA	NA	NA	NA	NA	NA	NA	NA	NA	NA	NA	NA	NA	NA	NA	NA	NA	167	8.5984	0.0374	2.058	0.02909
CRC	LB-CRC-57	LB-CRC-57-P-01	m	72	Plasma	II	A	R0	yes	MSS	Adenokarzinom	linke Colonflexur	NA	MRD		before	diagnosis	baseline	Surgery	NA	-1	0	NA	NA	NA	NA	NA	NA	NA	NA	NA	NA	NA	NA	NA	NA	NA	NA	NA	NA	NA	NA	NA	NA	169	5.7465	0.09041	2.903	0.0323
CRC	LB-CRC-57	LB-CRC-57-P-02	m	72	Plasma	II	A	R0	no	MSS	Adenokarzinom	linke Colonflexur	NA	MRD		after	remission	post_surgery_1	Surgery	NA	5	0	NA	NA	NA	NA	NA	NA	NA	NA	NA	NA	NA	NA	NA	NA	NA	NA	NA	NA	NA	NA	NA	NA	164	79.2868	0	1.998	0
CRC	LB-CRC-57	LB-CRC-57-P-03	m	72	Plasma	II	A	R0	no	MSS	Adenokarzinom	linke Colonflexur	NA	MRD		after	remission	post_surgery_1	Surgery	NA	32	0	NA	NA	NA	NA	NA	NA	NA	NA	NA	NA	NA	NA	NA	NA	NA	NA	NA	NA	NA	NA	NA	NA	168	15.8424	0	1.999	0.03017
CRC	LB-CRC-58	LB-CRC-58-P-01	f	70	Plasma	IV	B	R0, R1	yes	MSS	Adenokarzinom	Coecum	Liver	MRD		before	diagnosis	baseline	Surgery	Chemo	-1	0	NA	NA	56	NA	NA	NA	NA	NA	NA	NA	NA	NA	NA	NA	NA	NA	NA	NA	NA	NA	NA	NA	164	2.07877	0.1458	2.374	0.3032
CRC	LB-CRC-58	LB-CRC-58-P-02	f	70	Plasma	IV	B	R0, R1	yes	MSS	Adenokarzinom	Coecum	Liver	MRD		before	therapy	post_surgery_1	Surgery	Chemo	1	0	NA	NA	56	NA	NA	NA	NA	NA	NA	NA	NA	NA	NA	NA	NA	NA	NA	NA	NA	NA	NA	NA	164	15.9655	0.1837	2.357	0.3399
CRC	LB-CRC-59	LB-CRC-59-P-01	f	80	Plasma	III	B	R0	no	NA	Adenokarzinom	Coecum	NA			during	therapy	post_surgery_1	Surgery	Chemo	71	0	NA	NA	71	NA	NA	NA	NA	NA	NA	NA	NA	NA	NA	NA	NA	NA	NA	NA	NA	NA	NA	NA	171	2.7	0.09829	2.894	0.03559
CRC	LB-CRC-59	LB-CRC-59-P-02	f	80	Plasma	III	B	R0	no	NA	Adenokarzinom	Coecum	NA			during	therapy	chemo_1	Surgery	Chemo	99	0	NA	NA	71	NA	NA	NA	NA	NA	NA	NA	NA	NA	NA	NA	NA	NA	NA	NA	NA	NA	NA	NA	172	8.9224	0.02905	2.033	0.03732
CRC	LB-CRC-59	LB-CRC-59-P-03	f	80	Plasma	III	B	R0	no	NA	Adenokarzinom	Coecum	NA			during	therapy	chemo_1	Surgery	Chemo	127	0	NA	NA	71	NA	NA	NA	NA	NA	NA	NA	NA	NA	NA	NA	NA	NA	NA	NA	NA	NA	NA	NA	171	5.799	0.02257	2.003	0
CRC	LB-CRC-59	LB-CRC-59-P-04	f	80	Plasma	III	B	R0	no	NA	Adenokarzinom	Coecum	NA			during	therapy	chemo_1	Surgery	Chemo	155	0	NA	NA	71	NA	NA	NA	NA	NA	NA	NA	NA	NA	NA	NA	NA	NA	NA	NA	NA	NA	NA	NA	170	4.569	0	1.999	0.03143
CRC	LB-CRC-60	LB-CRC-60-P-01	m	79	Plasma	IV	A	R0	yes	MSS	Karzinom	Coecum	Liver	MRD		before	diagnosis	baseline	Surgery	NA	-1	0	NA	NA	NA	NA	NA	NA	NA	NA	NA	NA	NA	NA	NA	NA	NA	NA	NA	NA	NA	NA	NA	NA	169	0.988	0	1.997	0.03106
CRC	LB-CRC-60	LB-CRC-60-P-02	m	79	Plasma	IV	A	R0	no	MSS	Karzinom	Coecum	Liver	MRD		after	remission	post_surgery_1	Surgery	NA	6	0	NA	NA	NA	NA	NA	NA	NA	NA	NA	NA	NA	NA	NA	NA	NA	NA	NA	NA	NA	NA	NA	NA	164	4.2404	0	1.998	0.02606
CRC	LB-CRC-61	LB-CRC-61-P-01	m	56	Plasma	IV	NA	NA	yes	MSS	Adenokarzinom	Sigma	Liver, Lung			before	diagnosis	baseline	NA	Chemo	-6	NA	NA	NA	0	NA	NA	NA	NA	NA	NA	NA	NA	81	NA	NA	NA	NA	NA	NA	NA	NA	NA	NA	159	96.1728	0.5155	2.484	0.5348
CRC	LB-CRC-61	LB-CRC-61-P-02	m	56	Plasma	IV	NA	NA	yes	MSS	Adenokarzinom	Sigma	Liver, Lung			during	therapy	chemo_1	NA	Chemo	42	NA	NA	NA	0	NA	NA	NA	NA	NA	NA	NA	NA	81	NA	NA	NA	NA	NA	NA	NA	NA	NA	NA	171	3.22892	0	2.001	0.06117
CRC	LB-CRC-62	LB-CRC-62-P-01	m	62	Plasma	III	B	R0	yes	MSS	Adenokarzinom	NA	NA	MRD		before	diagnosis	baseline	Surgery	Chemo	-1	0	NA	NA	27	NA	NA	NA	NA	NA	NA	NA	NA	NA	NA	NA	NA	NA	NA	NA	NA	NA	NA	NA	170	6.594	0	1.994	0
CRC	LB-CRC-62	LB-CRC-62-P-02	m	62	Plasma	III	B	R0	no	MSS	Adenokarzinom	NA	NA	MRD		during	therapy	post_surgery_1	Surgery	Chemo	8	0	NA	NA	27	NA	NA	NA	NA	NA	NA	NA	NA	NA	NA	NA	NA	NA	NA	NA	NA	NA	NA	NA	164	2.0022	0.04393	3.017	0.0425
CRC	LB-CRC-63	LB-CRC-63-P-01	f	50	Plasma	II	A	R0	yes	MSS	Adenokarzinom	Colon descendens	NA	MRD		before	diagnosis	baseline	Surgery	NA	-1	0	NA	NA	NA	NA	NA	NA	NA	NA	NA	NA	NA	NA	NA	NA	NA	NA	NA	NA	NA	NA	NA	NA	171	1.6668	0	2.001	0
CRC	LB-CRC-63	LB-CRC-63-P-02	f	50	Plasma	II	A	R0	no	MSS	Adenokarzinom	Colon descendens	NA	MRD		after	remission	post_surgery_1	Surgery	NA	6	0	NA	NA	NA	NA	NA	NA	NA	NA	NA	NA	NA	NA	NA	NA	NA	NA	NA	NA	NA	NA	NA	NA	170	2.01133	0	2	0.03979
CRC	LB-CRC-64	LB-CRC-64-P-01	m	79	Plasma	II	A	R0	yes	NA	Karzinom	Rectum	NA	MRD		before	diagnosis	baseline	Surgery	NA	-1	0	NA	NA	NA	NA	NA	NA	NA	NA	NA	NA	NA	NA	NA	NA	NA	NA	NA	NA	NA	NA	NA	NA	156	27.7248	0.03559	2.029	0.02874
CRC	LB-CRC-64	LB-CRC-64-P-02	m	79	Plasma	II	A	R0	no	NA	Karzinom	Rectum	NA	MRD		after	remission	post_surgery_1	Surgery	NA	6	0	NA	NA	NA	NA	NA	NA	NA	NA	NA	NA	NA	NA	NA	NA	NA	NA	NA	NA	NA	NA	NA	NA	330	21.302	0.0275	2.044	0
CRC	LB-CRC-65	LB-CRC-65-P-01	f	69	Plasma	II	A	R0	yes	NA	Adenokarzinom	Colon descendens	NA	MRD		before	diagnosis	baseline	Surgery	NA	-1	0	NA	NA	NA	NA	NA	NA	NA	NA	NA	NA	NA	NA	NA	NA	NA	NA	NA	NA	NA	NA	NA	NA	163	11.3928	0.07997	2.739	0.1108
CRC	LB-CRC-65	LB-CRC-65-P-02	f	69	Plasma	II	A	R0	no	NA	Adenokarzinom	Colon descendens	NA	MRD		after	remission	post_surgery_1	Surgery	NA	12	0	NA	NA	NA	NA	NA	NA	NA	NA	NA	NA	NA	NA	NA	NA	NA	NA	NA	NA	NA	NA	NA	NA	161	7.60586	0.04861	2.005	0.03365
CRC	LB-CRC-66	LB-CRC-66-P-01	m	61	Plasma	IV	NA	NA	yes	MSI-L	Adenokarzinom	Rectum	Liver			before	diagnosis	baseline	NA	Chemo	0	NA	NA	NA	0	NA	NA	NA	0	NA	NA	NA	NA	NA	NA	NA	NA	NA	NA	12	20	NA	NA	NA	162	7.827	0.3599	1.952	0.5525
CRC	LB-CRC-67	LB-CRC-67-P-01	m	81	Plasma	II	B	R0	yes	MSS	Adenokarzinom	Rectum		MRD		before	diagnosis	baseline	Surgery	NA	0	0	NA	NA	NA	NA	NA	NA	NA	NA	NA	NA	NA	NA	NA	NA	NA	NA	NA	NA	NA	NA	NA	NA	170	3.66525	0	2.002	0.01816
CRC	LB-CRC-67	LB-CRC-67-P-02	m	81	Plasma	II	B	R0	no	MSS	Adenokarzinom	Rectum		MRD		after	remission	post_surgery_1	Surgery	NA	6	0	NA	NA	NA	NA	NA	NA	NA	NA	NA	NA	NA	NA	NA	NA	NA	NA	NA	NA	NA	NA	NA	NA	168	55.7797	0.0312	2.108	0
CRC	LB-CRC-68	LB-CRC-68-P-01	m	79	Plasma	II	A	R0	yes	MSS	Adenokarzinom	Colon ascendens		MRD		before	diagnosis	baseline	Surgery	NA	-1	0	NA	NA	NA	NA	NA	NA	NA	NA	NA	NA	NA	NA	NA	NA	NA	NA	NA	NA	NA	NA	NA	NA	168	5.8395	0	2.002	0.03113
CRC	LB-CRC-68	LB-CRC-68-P-02	m	79	Plasma	II	A	R0	no	MSS	Adenokarzinom	Colon ascendens		MRD		after	remission	post_surgery_1	Surgery	NA	7	0	NA	NA	NA	NA	NA	NA	NA	NA	NA	NA	NA	NA	NA	NA	NA	NA	NA	NA	NA	NA	NA	NA	163	6.7948	0	2.001	0
CRC	LB-CRC-69	LB-CRC-69-P-01	f	73	Plasma	IV	NA	NA	yes	MSS	Adenokarzinom	Rectum	Lung			before	diagnosis	baseline	NA	Chemo	0	NA	NA	NA	0	NA	NA	NA	NA	NA	NA	NA	NA	NA	NA	NA	NA	NA	NA	NA	NA	NA	NA	NA	170	4.5894	0.01605	1.828	0.03861
CRC	LB-CRC-70	LB-CRC-70-P-01	f	71	Plasma	III	A	NA	yes	NA	Adenokarzinom	Anus	NA			before	diagnosis	baseline	NA	Chemo	-3	NA	NA	NA	0	NA	NA	NA	NA	NA	NA	NA	NA	NA	NA	NA	NA	NA	NA	NA	NA	NA	NA	NA	169	2.68757	0	1.999	0.03854
Healthy	LB-Neg-03	LB-Neg-03-P-01	m	52	Plasma	NA	NA	NA	NA	NA	NA	NA	NA			NA	NA	NA	NA	NA	NA	NA	NA	NA	NA	NA	NA	NA	NA	NA	NA	NA	NA	NA	NA	NA	NA	NA	NA	NA	NA	NA	NA	NA	175	1.89	0.03418	2.023	0.0404
Healthy	LB-Neg-04	LB-Neg-04-P-01	f	69	Plasma	NA	NA	NA	NA	NA	NA	NA	NA			NA	NA	NA	NA	NA	NA	NA	NA	NA	NA	NA	NA	NA	NA	NA	NA	NA	NA	NA	NA	NA	NA	NA	NA	NA	NA	NA	NA	NA	168	5.26	0.02869	2.01	0.04522
Healthy	LB-Neg-05	LB-Neg-05-P-01	m	30	Plasma	NA	NA	NA	NA	NA	NA	NA	NA			NA	NA	NA	NA	NA	NA	NA	NA	NA	NA	NA	NA	NA	NA	NA	NA	NA	NA	NA	NA	NA	NA	NA	NA	NA	NA	NA	NA	NA	175	4.92	0.04909	2.061	0.03775
Healthy	LB-Neg-08	LB-Neg-08-P-01	f	24	Plasma	NA	NA	NA	NA	NA	NA	NA	NA			NA	NA	NA	NA	NA	NA	NA	NA	NA	NA	NA	NA	NA	NA	NA	NA	NA	NA	NA	NA	NA	NA	NA	NA	NA	NA	NA	NA	NA	175	1.45	0	2.001	0.02322
Healthy	LB-Neg-09	LB-Neg-09-P-01	f	31	Plasma	NA	NA	NA	NA	NA	NA	NA	NA			NA	NA	NA	NA	NA	NA	NA	NA	NA	NA	NA	NA	NA	NA	NA	NA	NA	NA	NA	NA	NA	NA	NA	NA	NA	NA	NA	NA	NA	175	1.49	0	2.003	0.03066
Healthy	LB-Neg-10	LB-Neg-10-P-01	f	29	Plasma	NA	NA	NA	NA	NA	NA	NA	NA			NA	NA	NA	NA	NA	NA	NA	NA	NA	NA	NA	NA	NA	NA	NA	NA	NA	NA	NA	NA	NA	NA	NA	NA	NA	NA	NA	NA	NA	173	2.44	0.03961	2.043	0.05289
Healthy	LB-Neg-11	LB-Neg-11-P-01	f	51	Plasma	NA	NA	NA	NA	NA	NA	NA	NA			NA	NA	NA	NA	NA	NA	NA	NA	NA	NA	NA	NA	NA	NA	NA	NA	NA	NA	NA	NA	NA	NA	NA	NA	NA	NA	NA	NA	NA	172	1.17	0	2.002	0.04413
Healthy	LB-Neg-12	LB-Neg-12-P-01	f	55	Plasma	NA	NA	NA	NA	NA	NA	NA	NA			NA	NA	NA	NA	NA	NA	NA	NA	NA	NA	NA	NA	NA	NA	NA	NA	NA	NA	NA	NA	NA	NA	NA	NA	NA	NA	NA	NA	NA	169	0.84	0	1.994	0
Healthy	LB-Neg-14	LB-Neg-14-P-01	f	50	Plasma	NA	NA	NA	NA	NA	NA	NA	NA			NA	NA	NA	NA	NA	NA	NA	NA	NA	NA	NA	NA	NA	NA	NA	NA	NA	NA	NA	NA	NA	NA	NA	NA	NA	NA	NA	NA	NA	172	1.52	0.02325	2.155	0
Healthy	LB-Neg-15	LB-Neg-15-P-01	f	32	Plasma	NA	NA	NA	NA	NA	NA	NA	NA			NA	NA	NA	NA	NA	NA	NA	NA	NA	NA	NA	NA	NA	NA	NA	NA	NA	NA	NA	NA	NA	NA	NA	NA	NA	NA	NA	NA	NA	180	2.31	0.04628	2.178	0.04702
Healthy	LB-Neg-16	LB-Neg-16-P-01	m	39	Plasma	NA	NA	NA	NA	NA	NA	NA	NA			NA	NA	NA	NA	NA	NA	NA	NA	NA	NA	NA	NA	NA	NA	NA	NA	NA	NA	NA	NA	NA	NA	NA	NA	NA	NA	NA	NA	NA	169	0.91	0.03959	2.052	0.0368
Healthy	LB-Neg-17	LB-Neg-17-P-01	m	24	Plasma	NA	NA	NA	NA	NA	NA	NA	NA			NA	NA	NA	NA	NA	NA	NA	NA	NA	NA	NA	NA	NA	NA	NA	NA	NA	NA	NA	NA	NA	NA	NA	NA	NA	NA	NA	NA	NA	173	8.71	0.03897	1.927	0
Healthy	LB-Neg-18	LB-Neg-18-P-01	f	25	Plasma	NA	NA	NA	NA	NA	NA	NA	NA			NA	NA	NA	NA	NA	NA	NA	NA	NA	NA	NA	NA	NA	NA	NA	NA	NA	NA	NA	NA	NA	NA	NA	NA	NA	NA	NA	NA	NA	176	2.07	0.0266	3.112	0
Healthy	LB-Neg-19	LB-Neg-19-P-01	f	42	Plasma	NA	NA	NA	NA	NA	NA	NA	NA			NA	NA	NA	NA	NA	NA	NA	NA	NA	NA	NA	NA	NA	NA	NA	NA	NA	NA	NA	NA	NA	NA	NA	NA	NA	NA	NA	NA	NA	173	2.53	0	1.999	0.02878
Healthy	LB-Neg-20	LB-Neg-20-P-01	m	46	Plasma	NA	NA	NA	NA	NA	NA	NA	NA			NA	NA	NA	NA	NA	NA	NA	NA	NA	NA	NA	NA	NA	NA	NA	NA	NA	NA	NA	NA	NA	NA	NA	NA	NA	NA	NA	NA	NA	178	3.03	0	2.015	0.03211
Healthy	LB-Neg-21	LB-Neg-21-P-01	f	21	Plasma	NA	NA	NA	NA	NA	NA	NA	NA			NA	NA	NA	NA	NA	NA	NA	NA	NA	NA	NA	NA	NA	NA	NA	NA	NA	NA	NA	NA	NA	NA	NA	NA	NA	NA	NA	NA	NA	169	2.37	0	2	0
Healthy	LB-Neg-23	LB-Neg-23-P-01	m	48	Plasma	NA	NA	NA	NA	NA	NA	NA	NA			NA	NA	NA	NA	NA	NA	NA	NA	NA	NA	NA	NA	NA	NA	NA	NA	NA	NA	NA	NA	NA	NA	NA	NA	NA	NA	NA	NA	NA	175	3.32	0.04023	2.06	0.02278
Healthy	LB-Neg-28	LB-Neg-28-P-01	f	54	Plasma	NA	NA	NA	NA	NA	NA	NA	NA			NA	NA	NA	NA	NA	NA	NA	NA	NA	NA	NA	NA	NA	NA	NA	NA	NA	NA	NA	NA	NA	NA	NA	NA	NA	NA	NA	NA	NA	172	3.67	0	2	0.04558
Healthy	LB-Neg-31	LB-Neg-31-P-01	m	32	Plasma	NA	NA	NA	NA	NA	NA	NA	NA			NA	NA	NA	NA	NA	NA	NA	NA	NA	NA	NA	NA	NA	NA	NA	NA	NA	NA	NA	NA	NA	NA	NA	NA	NA	NA	NA	NA	NA	174	0.66	0.05112	2.022	0.0426
Healthy	LB-Neg-34	LB-Neg-34-P-01	f	23	Plasma	NA	NA	NA	NA	NA	NA	NA	NA			NA	NA	NA	NA	NA	NA	NA	NA	NA	NA	NA	NA	NA	NA	NA	NA	NA	NA	NA	NA	NA	NA	NA	NA	NA	NA	NA	NA	NA	172	1.91	0	2.001	0
Healthy	LB-Neg-37	LB-Neg-37-P-01	m	60	Plasma	NA	NA	NA	NA	NA	NA	NA	NA			NA	NA	NA	NA	NA	NA	NA	NA	NA	NA	NA	NA	NA	NA	NA	NA	NA	NA	NA	NA	NA	NA	NA	NA	NA	NA	NA	NA	NA	180	4.55	0	2.002	0
Healthy	LB-Neg-38	LB-Neg-38-P-01	m	20	Plasma	NA	NA	NA	NA	NA	NA	NA	NA			NA	NA	NA	NA	NA	NA	NA	NA	NA	NA	NA	NA	NA	NA	NA	NA	NA	NA	NA	NA	NA	NA	NA	NA	NA	NA	NA	NA	NA	168	1.75	0	1.999	0
Healthy	LB-Neg-39	LB-Neg-39-P-01	m	30	Plasma	NA	NA	NA	NA	NA	NA	NA	NA			NA	NA	NA	NA	NA	NA	NA	NA	NA	NA	NA	NA	NA	NA	NA	NA	NA	NA	NA	NA	NA	NA	NA	NA	NA	NA	NA	NA	NA	176	12.6	0	2.003	0
Healthy	LB-Neg-40	LB-Neg-40-P-01	f	49	Plasma	NA	NA	NA	NA	NA	NA	NA	NA			NA	NA	NA	NA	NA	NA	NA	NA	NA	NA	NA	NA	NA	NA	NA	NA	NA	NA	NA	NA	NA	NA	NA	NA	NA	NA	NA	NA	NA	171	2.55	0	1.998	0
Healthy	LB-Neg-41	LB-Neg-41-P-01	f	31	Plasma	NA	NA	NA	NA	NA	NA	NA	NA			NA	NA	NA	NA	NA	NA	NA	NA	NA	NA	NA	NA	NA	NA	NA	NA	NA	NA	81	NA	NA	NA	NA	NA	NA	NA	NA	NA	NA	177	3.42	0	2.003	0.02744
Healthy	LB-Neg-45	LB-Neg-45-P-01	m	26	Plasma	NA	NA	NA	NA	NA	NA	NA	NA			NA	NA	NA	NA	NA	NA	NA	NA	NA	NA	NA	NA	NA	NA	NA	NA	NA	NA	NA	NA	NA	NA	NA	NA	NA	NA	NA	NA	NA	168	2.3	0.03302	2.023	0
Healthy	LB-Neg-46	LB-Neg-46-P-01	m	24	Plasma	NA	NA	NA	NA	NA	NA	NA	NA			NA	NA	NA	NA	NA	NA	NA	NA	NA	NA	NA	NA	NA	NA	NA	NA	NA	NA	NA	NA	NA	NA	NA	NA	NA	NA	NA	NA	NA	176	2.76	0.03405	2.039	0
Healthy	LB-Neg-47	LB-Neg-47-P-01	m	46	Plasma	NA	NA	NA	NA	NA	NA	NA	NA			NA	NA	NA	NA	NA	NA	NA	NA	NA	NA	NA	NA	NA	NA	NA	NA	NA	NA	NA	NA	NA	NA	NA	NA	NA	NA	NA	NA	NA	171	3.15	0	2.003	0.04154
Healthy	LB-Neg-48	LB-Neg-48-P-01	m	41	Plasma	NA	NA	NA	NA	NA	NA	NA	NA			NA	NA	NA	NA	NA	NA	NA	NA	NA	NA	NA	NA	NA	NA	NA	NA	NA	NA	NA	NA	NA	NA	NA	NA	NA	NA	NA	NA	NA	170	5.64	0	2.001	0
Healthy	LB-Neg-50	LB-Neg-50-P-01	m	26	Plasma	NA	NA	NA	NA	NA	NA	NA	NA			NA	NA	NA	NA	NA	NA	NA	NA	NA	NA	NA	NA	NA	NA	NA	NA	NA	NA	NA	NA	NA	NA	NA	NA	NA	NA	NA	NA	NA	176	1.99	0	1.999	0.04277
Healthy	LB-Neg-51	LB-Neg-51-P-01	f	27	Plasma	NA	NA	NA	NA	NA	NA	NA	NA			NA	NA	NA	NA	NA	NA	NA	NA	NA	NA	NA	NA	NA	NA	NA	NA	NA	NA	NA	NA	NA	NA	NA	NA	NA	NA	NA	NA	NA	172	2.59	0	1.996	0
Healthy	LB-Neg-52	LB-Neg-52-P-01	m	31	Plasma	NA	NA	NA	NA	NA	NA	NA	NA			NA	NA	NA	NA	NA	NA	NA	NA	NA	NA	NA	NA	NA	NA	NA	NA	NA	NA	NA	NA	NA	NA	NA	NA	NA	NA	NA	NA	NA	175	2.64	0	2.001	0.02754
Healthy	LB-Neg-53	LB-Neg-53-P-01	f	25	Plasma	NA	NA	NA	NA	NA	NA	NA	NA			NA	NA	NA	NA	NA	NA	NA	NA	NA	NA	NA	NA	NA	NA	NA	NA	NA	NA	NA	NA	NA	NA	NA	NA	NA	NA	NA	NA	NA	171	2.76	0	1.999	0
Healthy	LB-Neg-54	LB-Neg-54-P-01	m	31	Plasma	NA	NA	NA	NA	NA	NA	NA	NA			NA	NA	NA	NA	NA	NA	NA	NA	NA	NA	NA	NA	NA	NA	NA	NA	NA	NA	NA	NA	NA	NA	NA	NA	NA	NA	NA	NA	NA	171	3.09	0	2	0
Healthy	LB-Neg-56	LB-Neg-56-P-01	f	43	Plasma	NA	NA	NA	NA	NA	NA	NA	NA			NA	NA	NA	NA	NA	NA	NA	NA	NA	NA	NA	NA	NA	NA	NA	NA	NA	NA	NA	NA	NA	NA	NA	NA	NA	NA	NA	NA	NA	174	2.8	0.03883	2.002	0.04191
Healthy	LB-Neg-58	LB-Neg-58-P-01	f	28	Plasma	NA	NA	NA	NA	NA	NA	NA	NA			NA	NA	NA	NA	NA	NA	NA	NA	NA	NA	NA	NA	NA	NA	NA	NA	NA	NA	NA	NA	NA	NA	NA	NA	NA	NA	NA	NA	NA	177	0.98	0	1.997	0.03034
Healthy	LB-Neg-59	LB-Neg-59-P-01	f	24	Plasma	NA	NA	NA	NA	NA	NA	NA	NA			NA	NA	NA	NA	NA	NA	NA	NA	NA	NA	NA	NA	NA	NA	NA	NA	NA	NA	NA	NA	NA	NA	NA	NA	NA	NA	NA	NA	NA	171	3.07	0	2.003	0.0436
Healthy	LB-Neg-60	LB-Neg-60-P-01	f	30	Plasma	NA	NA	NA	NA	NA	NA	NA	NA			NA	NA	NA	NA	NA	NA	NA	NA	NA	NA	NA	NA	NA	NA	NA	NA	NA	NA	NA	NA	NA	NA	NA	NA	NA	NA	NA	NA	NA	178	1.25	0	2	0
Healthy	LB-Neg-61	LB-Neg-61-P-01	m	37	Plasma	NA	NA	NA	NA	NA	NA	NA	NA			NA	NA	NA	NA	NA	NA	NA	NA	NA	NA	NA	NA	NA	NA	NA	NA	NA	NA	NA	NA	NA	NA	NA	NA	NA	NA	NA	NA	NA	171	2.12	0	1.999	0.04447
Healthy	LB-Neg-62	LB-Neg-62-P-01	m	33	Plasma	NA	NA	NA	NA	NA	NA	NA	NA			NA	NA	NA	NA	NA	NA	NA	NA	NA	NA	NA	NA	NA	NA	NA	NA	NA	NA	NA	NA	NA	NA	NA	NA	NA	NA	NA	NA	NA	172	5.17	0	1.999	0.02803
Healthy	LB-Neg-63	LB-Neg-63-P-01	m	44	Plasma	NA	NA	NA	NA	NA	NA	NA	NA			NA	NA	NA	NA	NA	NA	NA	NA	NA	NA	NA	NA	NA	NA	NA	NA	NA	NA	NA	NA	NA	NA	NA	NA	NA	NA	NA	NA	NA	172	2.82	0	2	0.0297
Healthy	LB-Neg-64	LB-Neg-64-P-01	f	72	Plasma	NA	NA	NA	NA	NA	NA	NA	NA			NA	NA	NA	NA	NA	NA	NA	NA	NA	NA	NA	NA	NA	NA	NA	NA	NA	NA	NA	NA	NA	NA	NA	NA	NA	NA	NA	NA	NA	171	2.39	0	2	0.03251
Healthy	LB-Neg-65	LB-Neg-65-P-01	m	73	Plasma	NA	NA	NA	NA	NA	NA	NA	NA			NA	NA	NA	NA	NA	NA	NA	NA	NA	NA	NA	NA	NA	NA	NA	NA	NA	NA	NA	NA	NA	NA	NA	NA	NA	NA	NA	NA	NA	172	3.04	0.02868	2.006	0.03442
Healthy	LB-Neg-67	LB-Neg-67-P-01	f	39	Plasma	NA	NA	NA	NA	NA	NA	NA	NA			NA	NA	NA	NA	NA	NA	NA	NA	NA	NA	NA	NA	NA	NA	NA	NA	NA	NA	NA	NA	NA	NA	NA	NA	NA	NA	NA	NA	NA	174	2.15	0	2.002	0
Healthy	LB-Neg-68	LB-Neg-68-P-01	f	40	Plasma	NA	NA	NA	NA	NA	NA	NA	NA			NA	NA	NA	NA	NA	NA	NA	NA	NA	NA	NA	NA	NA	NA	NA	NA	NA	NA	NA	NA	NA	NA	NA	NA	NA	NA	NA	NA	NA	173	1.92	0	2.001	0.04006
Healthy	LB-Neg-69	LB-Neg-69-P-01	m	56	Plasma	NA	NA	NA	NA	NA	NA	NA	NA			NA	NA	NA	NA	NA	NA	NA	NA	NA	NA	NA	NA	NA	NA	NA	NA	NA	NA	NA	NA	NA	NA	NA	NA	NA	NA	NA	NA	NA	173	3.41	0	2	0
Healthy	LB-Neg-70	LB-Neg-70-P-01	m	26	Plasma	NA	NA	NA	NA	NA	NA	NA	NA			NA	NA	NA	NA	NA	NA	NA	NA	NA	NA	NA	NA	NA	NA	NA	NA	NA	NA	NA	NA	NA	NA	NA	NA	NA	NA	NA	NA	NA	174	1.29	0	1.996	0
Healthy	LB-Neg-71	LB-Neg-71-P-01	f	36	Plasma	NA	NA	NA	NA	NA	NA	NA	NA			NA	NA	NA	NA	NA	NA	NA	NA	NA	NA	NA	NA	NA	NA	NA	NA	NA	NA	NA	NA	NA	NA	NA	NA	NA	NA	NA	NA	NA	173	1.52	0.03245	1.956	0
Healthy	LB-Neg-72	LB-Neg-72-P-01	m	30	Plasma	NA	NA	NA	NA	NA	NA	NA	NA			NA	NA	NA	NA	NA	NA	NA	NA	NA	NA	NA	NA	NA	NA	NA	NA	NA	NA	NA	NA	NA	NA	NA	NA	NA	NA	NA	NA	NA	178	2.46	0.08504	3.019	0.02935
Healthy	LB-Neg-73	LB-Neg-73-P-01	m	38	Plasma	NA	NA	NA	NA	NA	NA	NA	NA			NA	NA	NA	NA	NA	NA	NA	NA	NA	NA	NA	NA	NA	NA	NA	NA	NA	NA	NA	NA	NA	NA	NA	NA	NA	NA	NA	NA	NA	177	3.04	0	1.99	0.02002
Healthy	LB-Neg-74	LB-Neg-74-P-01	m	29	Plasma	NA	NA	NA	NA	NA	NA	NA	NA			NA	NA	NA	NA	NA	NA	NA	NA	NA	NA	NA	NA	NA	NA	NA	NA	NA	NA	NA	NA	NA	NA	NA	NA	NA	NA	NA	NA	NA	178	2.4	0.04061	3.026	0.03725
Healthy	LB-Neg-75	LB-Neg-75-P-01	m	25	Plasma	NA	NA	NA	NA	NA	NA	NA	NA			NA	NA	NA	NA	NA	NA	NA	NA	NA	NA	NA	NA	NA	NA	NA	NA	NA	NA	NA	NA	NA	NA	NA	NA	NA	NA	NA	NA	NA	174	4.22	0.06909	3.018	0.04165
Healthy	LB-Neg-78	LB-Neg-78-P-01	m	24	Plasma	NA	NA	NA	NA	NA	NA	NA	NA			NA	NA	NA	NA	NA	NA	NA	NA	NA	NA	NA	NA	NA	NA	NA	NA	NA	NA	NA	NA	NA	NA	NA	NA	NA	NA	NA	NA	NA	176	2.63	0	1.998	0
Healthy	LB-Neg-80	LB-Neg-80-P-01	m	22	Plasma	NA	NA	NA	NA	NA	NA	NA	NA			NA	NA	NA	NA	NA	NA	NA	NA	NA	NA	NA	NA	NA	NA	NA	NA	NA	NA	NA	NA	NA	NA	NA	NA	NA	NA	NA	NA	NA	177	3.78	0	1.997	0.02976
Healthy	LB-Neg-81	LB-Neg-81-P-01	m	42	Plasma	NA	NA	NA	NA	NA	NA	NA	NA			NA	NA	NA	NA	NA	NA	NA	NA	NA	NA	NA	NA	NA	NA	NA	NA	NA	NA	NA	NA	NA	NA	NA	NA	NA	NA	NA	NA	NA	174	5.48	0.03691	1.973	0.03165
[truncated: 141 more columns]

## Sheet: Supplementary Table 7
Supplementary Table 7: Preparation of in silico dilutions
tumor_sample	healthy	Sex	Total_Reads_tumor_sample	Total_Reads_healthy	Mapped_Reads_tumor_sample	Mapped_Reads_healthy	mapping_rate_tumor_sample	mapping_rate_healthy	ichor_tumor_content	Target_tumor_content	Target_Reads_tumor	Target_Reads_healthy	Total_Reads_Target_Cov	Percent_Reads_tumor_sample	Percent_Reads_healthy
LB-CRC-32-P-01	LB-Neg-51-P-01	f	194090938	242422790	188665995	231636860	0.972049	0.955508	0.701	0.1	2.78835e+07	1.69665e+08	190000000	0.143662	0.699874
LB-CRC-35-P-01	LB-Neg-72-P-01	m	126176242	302281934	121117100	285533820	0.959904	0.944594	0.1176	0.1	1.2402e+08	1.6917e+07	140000000	0.982913	0.0559642
LB-CRC-58-P-01	LB-Neg-18-P-01	f	484560244	405470908	480916842	380838129	0.992481	0.939249	0.1458	0.1	1.31303e+08	6.24938e+07	190000000	0.270973	0.154126
LB-CRC-21-P-01	LB-Neg-71-P-01	f	174622400	198472576	172874808	186131103	0.989992	0.937818	0.135	0.1	1.42163e+08	5.10083e+07	190000000	0.814119	0.257004
LB-CRC-61-P-01	LB-Neg-39-P-01	m	167718680	199362510	166134308	197113079	0.990553	0.988717	0.5155	0.1	3.72089e+07	1.54535e+08	190000000	0.221853	0.775144
LB-CRC-32-P-01	LB-Neg-51-P-01	f	194090938	242422790	188665995	231636860	0.972049	0.955508	0.701	0.05	1.39417e+07	1.84256e+08	190000000	0.071831	0.760061
LB-CRC-35-P-01	LB-Neg-72-P-01	m	126176242	302281934	121117100	285533820	0.959904	0.944594	0.1176	0.05	8.41566e+07	1.12052e+08	190000000	0.666977	0.370686
LB-CRC-58-P-01	LB-Neg-18-P-01	f	484560244	405470908	480916842	380838129	0.992481	0.939249	0.1458	0.05	6.56514e+07	1.32392e+08	190000000	0.135487	0.326513
LB-CRC-21-P-01	LB-Neg-71-P-01	f	174622400	198472576	172874808	186131103	0.989992	0.937818	0.135	0.05	7.10817e+07	1.26803e+08	190000000	0.40706	0.638895
LB-CRC-61-P-01	LB-Neg-39-P-01	m	167718680	199362510	166134308	197113079	0.990553	0.988717	0.5155	0.05	1.86045e+07	1.73351e+08	190000000	0.110927	0.869529
LB-CRC-32-P-01	LB-Neg-51-P-01	f	194090938	242422790	188665995	231636860	0.972049	0.955508	0.701	0.025	6.97087e+06	1.91552e+08	190000000	0.0359155	0.790155
LB-CRC-35-P-01	LB-Neg-72-P-01	m	126176242	302281934	121117100	285533820	0.959904	0.944594	0.1176	0.025	4.20783e+07	1.56598e+08	190000000	0.333488	0.518053
LB-CRC-58-P-01	LB-Neg-18-P-01	f	484560244	405470908	480916842	380838129	0.992481	0.939249	0.1458	0.025	3.28257e+07	1.6734e+08	190000000	0.0677433	0.412706
LB-CRC-21-P-01	LB-Neg-71-P-01	f	174622400	198472576	172874808	186131103	0.989992	0.937818	0.135	0.025	3.55409e+07	1.64701e+08	190000000	0.20353	0.829841
LB-CRC-61-P-01	LB-Neg-39-P-01	m	167718680	199362510	166134308	197113079	0.990553	0.988717	0.5155	0.025	9.30223e+06	1.8276e+08	190000000	0.0554633	0.916721
LB-CRC-32-P-01	LB-Neg-51-P-01	f	194090938	242422790	188665995	231636860	0.972049	0.955508	0.701	0.01	2.78835e+06	1.95929e+08	190000000	0.0143662	0.808212
LB-CRC-35-P-01	LB-Neg-72-P-01	m	126176242	302281934	121117100	285533820	0.959904	0.944594	0.1176	0.01	1.68313e+07	1.83326e+08	190000000	0.133395	0.606473
LB-CRC-58-P-01	LB-Neg-18-P-01	f	484560244	405470908	480916842	380838129	0.992481	0.939249	0.1458	0.01	1.31303e+07	1.8831e+08	190000000	0.0270973	0.464422
LB-CRC-21-P-01	LB-Neg-71-P-01	f	174622400	198472576	172874808	186131103	0.989992	0.937818	0.135	0.01	1.42163e+07	1.87439e+08	190000000	0.0814119	0.944408
LB-CRC-61-P-01	LB-Neg-39-P-01	m	167718680	199362510	166134308	197113079	0.990553	0.988717	0.5155	0.01	3.72089e+06	1.88405e+08	190000000	0.0221853	0.945037
LB-CRC-32-P-01	LB-Neg-51-P-01	f	194090938	242422790	188665995	231636860	0.972049	0.955508	0.701	0.005	1.39417e+06	1.97388e+08	190000000	0.0071831	0.814231
LB-CRC-35-P-01	LB-Neg-72-P-01	m	126176242	302281934	121117100	285533820	0.959904	0.944594	0.1176	0.005	8.41566e+06	1.92235e+08	190000000	0.0666977	0.635947
LB-CRC-58-P-01	LB-Neg-18-P-01	f	484560244	405470908	480916842	380838129	0.992481	0.939249	0.1458	0.005	6.56514e+06	1.953e+08	190000000	0.0135487	0.481661
LB-CRC-21-P-01	LB-Neg-71-P-01	f	174622400	198472576	172874808	186131103	0.989992	0.937818	0.135	0.005	7.10817e+06	1.95019e+08	190000000	0.040706	0.982597
LB-CRC-32-P-01	LB-Neg-39-P-01	m	167718680	199362510	166134308	197113079	0.990553	0.988717	0.5155	0.005	1.86045e+06	1.90287e+08	190000000	0.0110927	0.954475

## Sheet: Supplementary Table 8
Supplementary Table 8: Proof-of-principle
Sample_Type	LB_Nr	SampleID	Sex	Target_tumor_content	tumor_fraction	tumor_ploidy	filtered_tumor_fraction	filtered_tumor_ploidy	number_focal_amps	number_scnas	glob_frag_pValue	chr1p_pValue	chr1p_pValue_inclCNV	chr1q_pValue	chr1q_pValue_inclCNV	chr2p_pValue	chr2p_pValue_inclCNV	chr2q_pValue	chr2q_pValue_inclCNV	chr3p_pValue	chr3p_pValue_inclCNV	chr3q_pValue	chr3q_pValue_inclCNV	chr4p_pValue	chr4p_pValue_inclCNV	chr4q_pValue	chr4q_pValue_inclCNV	chr5p_pValue	chr5p_pValue_inclCNV	chr5q_pValue	chr5q_pValue_inclCNV	chr6p_pValue	chr6p_pValue_inclCNV	chr6q_pValue	chr6q_pValue_inclCNV	chr7p_pValue	chr7p_pValue_inclCNV	chr7q_pValue	chr7q_pValue_inclCNV	chr8p_pValue	chr8p_pValue_inclCNV	chr8q_pValue	chr8q_pValue_inclCNV	chr9p_pValue	chr9p_pValue_inclCNV	chr9q_pValue	chr9q_pValue_inclCNV	chr10p_pValue	chr10p_pValue_inclCNV
Healthy	LB-Neg-55	LB-Neg-55-P-01	m	NA	0	1.998	0.02649	2.109	0	3	0.214286	0.25	0.25	0.5	0.5	0.428571	0.428571	0.571429	0.571429	0.964286	0.964286	0.214286	0.214286	1	1	0.178571	0.178571	0.357143	0.357143		0.964286	0.821429	0.821429	0.678571	0.678571	0.821429	0.821429	0.178571	0.178571	0.928571	0.928571	0.642857	0.642857	0.535714	0.535714	0.607143	0.607143	0.785714	0.785714
Healthy	LB-Neg-66	LB-Neg-66-P-01	f	NA	0	1.995	0	2	0	6	0.928571	0.642857	0.642857	0.642857	0.642857	0.357143	0.357143	0.821429	0.821429	0.928571	0.928571	0.892857	0.892857	0.214286	0.214286	0.607143	0.607143	0.75	0.75	0.571429	0.571429	0.5	0.5	0.785714	0.785714		0.785714	0.428571	0.428571	0.928571	0.928571	0.714286	0.714286		0.678571		0.892857	0.607143	0.607143
Healthy	LB-Neg-83	LB-Neg-83-P-01	f	NA	0	1.994	0.02997	2.053	0	4	0.928571	0.5	0.5	0.75	0.75	0.857143	0.857143	0.892857	0.892857	0.392857	0.392857	0.5	0.5	1	1	0.75	0.75	0.464286	0.464286	0.571429	0.571429	0.5	0.5	0.5	0.5	1	1	0.678571	0.678571	0.535714	0.535714	0.214286	0.214286	1	1	0.892857	0.892857	0.392857	0.392857
Healthy	LB-Neg-84	LB-Neg-84-P-01	m	NA	0	1.995	0.02897	2.132	2	7	0.214286	0.928571	0.928571		0.357143	0.535714	0.535714	0.392857	0.392857	0.535714	0.535714	1	1	0.107143	0.107143		0.75	0.178571	0.178571	1	1	0.142857	0.142857	0.392857	0.392857	0.607143	0.607143	0.642857	0.642857	0.107143	0.107143	0.464286	0.464286	0.25	0.25	0.142857	0.142857	1	1
Healthy	LB-Neg-85	LB-Neg-85-P-01	m	NA	0	2	0.03236	2.097	0	3	0.75	0.428571	0.428571	0.357143	0.357143	0.428571	0.428571	0.392857	0.392857	0.5	0.5	0.571429	0.571429	0.75	0.75	0.821429	0.821429	0.357143	0.357143	0.714286	0.714286	0.142857	0.142857	0.392857	0.392857	0.964286	0.964286	0.857143	0.857143	0.535714	0.535714	0.535714	0.535714	1	1	0.821429	0.821429	0.892857	0.892857
Healthy	LB-Neg-86	LB-Neg-86-P-01	f	NA	0	1.999	0.03575	2.053	1	4	0.535714	0.857143	0.857143	0.0357143	0.0357143	0.464286	0.464286	0.5	0.5	0.25	0.25	0.0714286	0.0714286	0.0357143	0.0357143	0.928571	0.928571	0.142857	0.142857	0.678571	0.678571	0.178571	0.178571	0.964286	0.964286		0.535714	0.392857	0.392857		0.178571		0.857143	0.892857	0.892857	0.142857	0.142857	0.642857	0.642857
in_silico	LB_IS_155005	LB_IS_155005_P_01	f	0.005	0.03165	1.94	0.03233	2.011	0	2	0.571429	0.107143	0.107143	0.714286	0.714286	0.142857	0.142857	0.821429	0.821429	0.928571	0.928571	0.25	0.25	0.0714286	0.0714286	0.928571	0.928571	0.464286	0.464286	0.928571	0.928571	0.428571	0.428571	0.964286	0.964286	0.178571	0.178571	0.821429	0.821429	0.107143	0.107143	0.107143	0.107143	0.214286	0.214286	0.107143	0.107143	0.464286	0.464286
in_silico	LB_IS_155010	LB_IS_155010_P_01	f	0.01	0.03846	2.879	0.04058	2.029	1	5	0.535714	0.0714286	0.0714286	0.607143	0.607143	0.142857	0.142857	0.892857	0.892857	1	1	0.357143	0.357143	0.0714286	0.0714286	0.821429	0.821429	0.321429	0.321429	0.142857	0.142857	0.25	0.25	0.892857	0.892857	0.0714286	0.0714286	0.964286	0.964286		0.0714286	0.107143	0.107143	0.25	0.25	0.107143	0.107143	0.178571	0.178571
in_silico	LB_IS_155025	LB_IS_155025_P_01	f	0.025	0.04119	1.965	0.05977	2.05	1	7	0.535714	0.0357143	0.0357143	0.357143	0.357143	0.25	0.25	0.821429	0.821429	0.964286	0.964286	0.357143	0.357143	0.0714286	0.0714286	0.678571	0.678571	0.321429	0.321429	0.0357143	0.0357143		0.0714286	0.5	0.5	0.0357143	0.0357143	0.964286	0.964286	0.0357143	0.0357143	0.0714286	0.0714286	0.321429	0.321429	0.0714286	0.0714286	0.607143	0.607143
in_silico	LB_IS_155050	LB_IS_155050_P_01	f	0.05	0.06339	1.999	0.1105	2.024	1	14	0.535714	0.0357143	0.0357143	0.0357143	0.0357143	0.285714	0.285714	0.321429	0.321429	0.642857	0.642857	0.214286	0.214286	0.0714286	0.0714286	0.357143	0.357143	0.428571	0.428571		0.0357143	0.0357143	0.0357143	0.464286	0.464286	0.0357143	0.0357143	0.892857	0.892857		0.0357143	0.0357143	0.0357143	0.642857	0.642857	0.0714286	0.0714286	0.642857	0.642857
in_silico	LB_IS_155100	LB_IS_155100_P_01	f	0.1	0.1045	1.982	0.1744	1.998	3	43	0.535714	0.0357143	0.0357143	0.0357143	0.0357143	0.25	0.25	0.0714286	0.0714286	0.5	0.5	0.214286	0.214286	0.0357143	0.0357143		0.285714		0.357143		0.0357143		0.0357143		0.321429	0.0357143	0.0357143		0.392857		0.0357143		0.0357143	0.642857	0.642857	0.0357143	0.0357143	0.892857	0.892857
in_silico	LB_IS_168005	LB_IS_168005_P_01	f	0.005	0	1.996	0	2.059	1	6	0.0357143	0.107143	0.107143	0.214286	0.214286	0.428571	0.428571	0.357143	0.357143	0.75	0.75	0.714286	0.714286	0.821429	0.821429	0.357143	0.357143	0.142857	0.142857	0.142857	0.142857	0.357143	0.357143	0.107143	0.107143	0.642857	0.642857	0.607143	0.607143	0.107143	0.107143	0.214286	0.214286	0.607143	0.607143	0.75	0.75	0.571429	0.571429
in_silico	LB_IS_168010	LB_IS_168010_P_01	f	0.01	0	1.996	0	2.004	1	6	0.0357143	0.0714286	0.0714286	0.142857	0.142857	0.464286	0.464286	0.142857	0.142857	0.821429	0.821429	0.75	0.75	0.464286	0.464286	0.392857	0.392857	0.142857	0.142857	0.464286	0.464286	0.821429	0.821429	0.142857	0.142857	0.357143	0.357143	0.392857	0.392857	0.214286	0.214286	0.107143	0.107143	0.678571	0.678571	0.75	0.75	0.285714	0.285714
in_silico	LB_IS_168025	LB_IS_168025_P_01	f	0.025	0.05075	2.76	0.05327	2.777	3	9	0.0357143	0.0714286	0.0714286	0.0357143	0.0357143	0.535714	0.535714	0.0357143	0.0357143	0.25	0.25		0.214286	0.0714286	0.0714286	0.571429	0.571429	0.25	0.25	0.821429	0.821429	0.25	0.25	0.464286	0.464286	0.0714286	0.0714286	0.142857	0.142857		0.607143	0.0714286	0.0714286	0.75	0.75	1	1	0.285714	0.285714
in_silico	LB_IS_168050	LB_IS_168050_P_01	f	0.05	0.05255	2.167	0.06308	2.371	5	21	0.0357143	0.0357143	0.0357143		0.0357143	0.107143	0.107143	0.0357143	0.0357143	0.0714286	0.0714286		0.0714286	0.0714286	0.0714286	0.821429	0.821429	0.357143	0.357143	0.142857	0.142857		0.0714286	0.75	0.75	0.0357143	0.0357143	0.0357143	0.0357143		0.357143		0.0714286	1	1	0.75	0.75	0.0714286	0.0714286
in_silico	LB_IS_168100	LB_IS_168100_P_01	f	0.1	0.1125	2.119	0.1209	2.319	10	51	0.0357143		0.0357143		0.0357143	0.0357143	0.0357143	0.0357143	0.0357143		0.0357143		0.0714286	0.0357143	0.0357143		0.428571	0.928571	0.928571	0.0357143	0.0357143		0.0357143	0.357143	0.357143		0.0357143	0.0357143	0.0357143		0.0714286		0.0357143	0.857143	0.857143	0.607143	0.607143	0.0714286	0.0714286
in_silico	LB_IS_170005	LB_IS_170005_P_01	m	0.005	0.04312	2.92	0.0337	3.024	1	6	0.428571	0.285714	0.285714	0.892857	0.892857	0.107143	0.107143	0.0714286	0.0714286	0.214286	0.214286	0.535714	0.535714	0.0714286	0.0714286	0.714286	0.714286	0.0714286	0.0714286	0.0714286	0.0714286	0.678571	0.678571	0.0714286	0.0714286	0.857143	0.857143	0.107143	0.107143	0.0714286	0.0714286	0.214286	0.214286	0.714286	0.714286	0.357143	0.357143	0.0357143	0.0357143
in_silico	LB_IS_170010	LB_IS_170010_P_01	m	0.01	0.04186	2.834	0.03645	2.145	1	6	0.357143	0.25	0.25	0.964286	0.964286	0.0357143	0.0357143	0.0357143	0.0357143	0.178571	0.178571	0.678571	0.678571	0.0714286	0.0714286	0.285714	0.285714	0.0357143	0.0357143	0.0357143	0.0357143	0.357143	0.357143	0.0357143	0.0357143	0.0714286	0.0714286	0.0357143	0.0357143	0.0714286	0.0714286	0.107143	0.107143	0.714286	0.714286	0.357143	0.357143	0.0357143	0.0357143
in_silico	LB_IS_170025	LB_IS_170025_P_01	m	0.025	0.04135	2.081	0.08305	2.101	3	9	0.25	0.142857	0.142857	0.428571	0.428571	0.0357143	0.0357143	0.0357143	0.0357143	0.107143	0.107143	0.75	0.75	0.0714286	0.0714286	0.0357143	0.0357143	0.0357143	0.0357143	0.0357143	0.0357143	0.0357143	0.0357143	0.0357143	0.0357143	0.0357143	0.0357143	0.0357143	0.0357143	0.0357143	0.0357143	0.0714286	0.0714286	0.607143	0.607143	0.321429	0.321429	0.0357143	0.0357143
in_silico	LB_IS_170050	LB_IS_170050_P_01	m	0.05	0.07739	2.098	0.1063	2.645	6	14	0.214286	0.142857	0.142857	0.0357143	0.0357143	0.0357143	0.0357143	0.0357143	0.0357143	0.0357143	0.0357143	0.535714	0.535714		0.0357143	0.0357143	0.0357143	0.0357143	0.0357143	0.0357143	0.0357143	0.0357143	0.0357143	0.0357143	0.0357143	0.0357143	0.0357143	0.0357143	0.0357143	0.0357143	0.0357143	0.0357143	0.0357143		0.0714286	0.357143	0.357143	0.0357143	0.0357143
in_silico	LB_IS_170100	LB_IS_170100_P_01	m	0.1	0.1044	2.632	0.1793	2.6	8	39	0.107143	0.0357143	0.0357143	0.0357143	0.0357143		0.0357143		0.0357143		0.0357143	0.0714286	0.0714286		0.0357143	0.0357143	0.0357143	0.0357143	0.0357143	0.0357143	0.0357143	0.0357143	0.0357143		0.0357143	0.0357143	0.0357143		0.0357143		0.0357143		0.0357143		0.0357143	0.0714286	0.0714286		0.0357143
in_silico	LB_IS_186005	LB_IS_186005_P_01	f	0.005	0.01957	3.076	0.04048	2.288	0	3	0.285714	0.821429	0.821429	0.0357143	0.0357143	0.0714286	0.0714286	0.0714286	0.0714286	0.107143	0.107143	0.928571	0.928571	0.5	0.5	0.0357143	0.0357143	0.25	0.25	0.142857	0.142857	0.0714286	0.0714286	0.464286	0.464286	0.0357143	0.0357143	0.0357143	0.0357143	0.464286	0.464286	0.0714286	0.0714286		0.0714286	0.75	0.75	0.857143	0.857143
in_silico	LB_IS_186010	LB_IS_186010_P_01	f	0.01	0.02747	2.907	0.04212	2.047	0	3	0.285714	0.535714	0.535714	0.0357143	0.0357143	0.0357143	0.0357143	0.0357143	0.0357143	0.0357143	0.0357143	0.214286	0.214286	0.0714286	0.0714286	0.0357143	0.0357143	0.607143	0.607143	0.0714286	0.0714286	0.0714286	0.0714286	0.142857	0.142857	0.0357143	0.0357143	0.0357143	0.0357143	0.0714286	0.0714286	0.0357143	0.0357143		0.0357143	0.107143	0.107143	0.0714286	0.0714286
in_silico	LB_IS_186025	LB_IS_186025_P_01	f	0.025	0.04578	1.971	0.09795	2.016	1	15	0.214286	0.214286	0.214286	0.0357143	0.0357143	0.0357143	0.0357143	0.0357143	0.0357143	0.0357143	0.0357143	0.0714286	0.0714286	0.0357143	0.0357143		0.0357143	0.928571	0.928571	0.0357143	0.0357143	0.0357143	0.0357143	0.0357143	0.0357143	0.0357143	0.0357143	0.0357143	0.0357143	0.0357143	0.0357143		0.0357143		0.0357143	0.0357143	0.0357143	0.0357143	0.0357143
in_silico	LB_IS_186050	LB_IS_186050_P_01	f	0.05	0.07803	1.99	0.1328	2.433	1	32	0.214286	0.464286	0.464286	0.0357143	0.0357143		0.0357143		0.0357143	0.0357143	0.0357143	0.0357143	0.0357143	0.0357143	0.0357143		0.0357143		0.0714286		0.25	0.0357143	0.0357143	0.0357143	0.0357143		0.0357143		0.0357143		0.0357143		0.0357143	0.0357143	0.0357143	0.107143	0.107143	0.0357143	0.0357143
in_silico	LB_IS_186100	LB_IS_186100_P_01	f	0.1	0.1037	2.408	0.2288	2.401	4	99	0.107143		0.0714286		0.0357143		0.0357143		0.0357143		0.0357143		0.0357143		0.0357143		0.0357143		0.464286		0.0357143	0.0357143	0.0357143	0.0357143	0.0357143		0.0357143		0.0357143		0.0357143		0.0357143		0.0357143	0.0357143	0.0357143	0.0357143	0.0357143
in_silico	LB_IS_188005	LB_IS_188005_P_01	m	0.005	0	2.003	0.05402	2.062	0	0	0.178571	0.357143	0.357143	0.357143	0.357143	0.107143	0.107143	0.0357143	0.0357143	0.678571	0.678571	0.571429	0.571429	0.178571	0.178571	0.0357143	0.0357143	0.964286	0.964286	0.0714286	0.0714286	0.892857	0.892857	0.0714286	0.0714286	0.0714286	0.0714286	0.142857	0.142857	0.0357143	0.0357143	0.0714286	0.0714286	0.107143	0.107143	0.0714286	0.0714286	0.535714	0.535714
in_silico	LB_IS_188010	LB_IS_188010_P_01	m	0.01	0	2.003	0.04803	1.909	0	1	0.178571	0.0714286	0.0714286	0.0357143	0.0357143	0.0357143	0.0357143	0.0357143	0.0357143	0.785714	0.785714	0.714286	0.714286	0.0714286	0.0714286	0.0357143	0.0357143	0.785714	0.785714	0.0357143	0.0357143	0.857143	0.857143	0.0357143	0.0357143	0.0357143	0.0357143	0.107143	0.107143	0.0357143	0.0357143		0.0357143	0.714286	0.714286	0.0357143	0.0357143	0.357143	0.357143
in_silico	LB_IS_188025	LB_IS_188025_P_01	m	0.025	0.05502	2.862	0.1086	2.557	2	19	0.25	0.0357143	0.0357143	0.0357143	0.0357143	0.0357143	0.0357143	0.0357143	0.0357143	0.0714286	0.0714286	0.214286	0.214286	0.0714286	0.0714286		0.0357143	0.75	0.75	0.107143	0.107143	1	1	0.107143	0.107143	0.0357143	0.0357143	0.0357143	0.0357143		0.0357143		0.0357143	0.0357143	0.0357143	0.0357143	0.0357143	0.107143	0.107143
in_silico	LB_IS_188050	LB_IS_188050_P_01	m	0.05	0.04069	1.845	0.1812	2.526	2	34	0.464286	0.0357143	0.0357143	0.0357143	0.0357143	0.0357143	0.0357143	0.0357143	0.0357143	0.0357143	0.0357143	0.107143	0.107143	0.0714286	0.0714286		0.0357143	0.5	0.5	0.107143	0.107143	0.428571	0.428571	0.0357143	0.0357143	0.0357143	0.0357143	0.0357143	0.0357143		0.0357143		0.0357143		0.0357143	0.0357143	0.0357143	0.0357143	0.0357143
in_silico	LB_IS_188100	LB_IS_188100_P_01	m	0.1	0.1089	2.508	0.2773	2.511	3	47	0.821429	0.0357143	0.0357143		0.0357143	0.0357143	0.0357143	0.0357143	0.0357143	0.0357143	0.0357143	0.0714286	0.0714286	0.0357143	0.0357143		0.0357143	0.25	0.25	0.357143	0.357143	0.0714286	0.0714286	0.0714286	0.0714286	0.0357143	0.0357143	0.0357143	0.0357143		0.0357143		0.0357143		0.0357143		0.0357143	0.0357143	0.0357143
[truncated: 78 more columns]
